# Supplementary material for: Dual role of ethyl bromodifluoroacetate in the formation of fluorine-containing heteroaromatic compounds
Source: Royal Society of Chemistry journal article supplement (doi:10.1039/c8cc04298e), 2018-01-01

## Electronic Supplementary Information

*for*

### Dual Roles of Ethyl Bromodifluoroacetate in the Formation of Fluorine-containing Heteroaromatic Compounds a

Xingxing Ma,<sup>a</sup> Shaoyu Mai,<sup>a</sup> Yao Zhou,<sup>a</sup> Gui-Juan Cheng<sup>b</sup> and Qiuling Song<sup>\*,a,c</sup>

<sup>a</sup> Institute of Next Generation Matter Transformation, College of Chemical Engineering at Huaqiao University, 668 Jimei Blvd, Xiamen, Fujian, 361021, P. R. China.

<sup>b</sup> Warshel Institute for Computational Biology, School of Science and Engineering, The Chinese University of Hong Kong, Shenzhen, 2001 Longxiang Road, Shenzhen 518172, P. R. China.

<sup>c</sup> State Key Laboratory of Organometallic Chemistry, Shanghai Institute of Organic Chemistry, Chinese Academy of Sciences, Shanghai 200032, P R China.

Fax:86-592-6162990.

E-mail: qsong@hqu.edu.cn

## Table of Contents

|                                                                                        |    |
|----------------------------------------------------------------------------------------|----|
| 1. General information.....                                                            | 3  |
| 2. Optimization of experiment conditions for <b>3a</b> .....                           | 4  |
| 3. General procedure for starting materials.....                                       | 8  |
| 4. General process for the synthesis of <b>3</b> .....                                 | 9  |
| 5. Crystal data of <b>3a</b> .....                                                     | 10 |
| 6. General process for the synthesis of <b>5</b> .....                                 | 12 |
| 7. Control experiments to figure out the key intermediate for this transformation..... | 12 |
| 8. Control experiments to figure out the formation of isocyanides from amines.....     | 13 |
| 9. Control experiments and radical trapping experiments.....                           | 13 |
| 10. Computation.....                                                                   | 14 |
| 11. Characterization data for products.....                                            | 16 |
| 12. References.....                                                                    | 29 |
| 13. NMR spectroscopic data.....                                                        | 30 |

## 1. General information

All chemicals were purchased from Adamas Reagent, energy chemical company ( $\text{BrCF}_2\text{COOEt}$ ,  $\text{BrCF}_2\text{COOH}$ ,  $\text{ClCF}_2\text{COONa}$ ), J&K Scientific Ltd, Bide Pharmatech Ltd and Tansoole, Shuya company ( $\text{BrCF}_2\text{PO}(\text{OEt})_2$ ). Unless otherwise stated, all experiments were conducted in a sealed tube under  $\text{N}_2$  atmosphere. Reactions were monitored by TLC or GC-MS analysis. Flash column chromatography was performed over silica gel (200-300 mesh).

$^1\text{H}$ -NMR and  $^{13}\text{C}$ -NMR spectra were recorded in  $\text{CDCl}_3$  on a Bruker Avance 500 spectrometer (500 MHz  $^1\text{H}$ , 125 MHz  $^{13}\text{C}$ , 470 MHz  $^9\text{F}$ ) at room temperature. Chemical shifts were reported in ppm on the scale relative to  $\text{CDCl}_3$  ( $\delta = 7.26$  for  $^1\text{H}$ -NMR,  $\delta = 77.00$  for  $^{13}\text{C}$ -NMR) as an internal reference. Coupling constants ( $J$ ) were reported in Hertz (Hz).

## 2. Optimization of experiment conditions for 3a

Table S1. The reaction of without the additive compared with additive

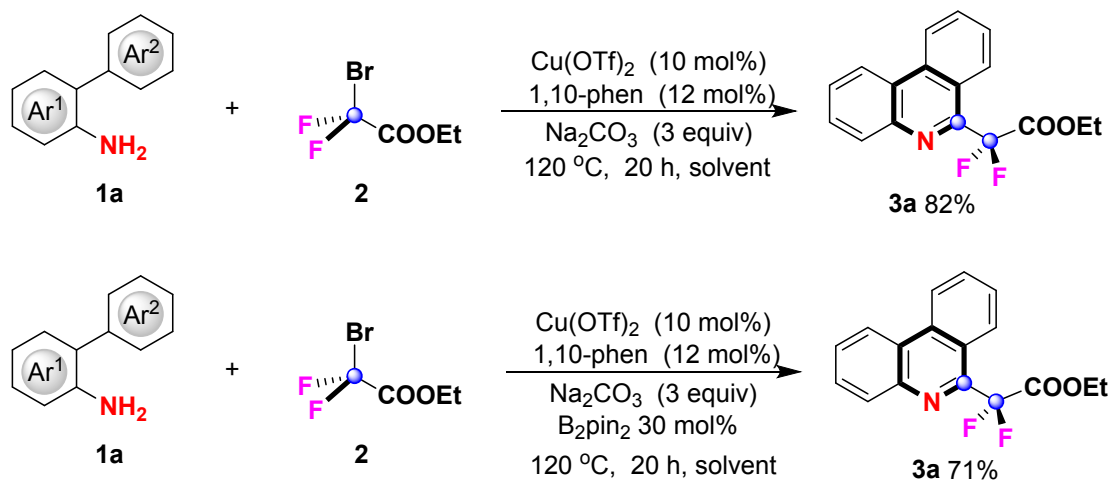

Table S2. Optimization of the bases

| <p>Reaction scheme showing the synthesis of 3a from 1a and 2 under various base conditions:</p> <p>1a (Ar<sup>1</sup>, Ar<sup>2</sup>) + 2 (Br, F, F, COOEt) <math>\xrightarrow[\text{base (3 equiv), } 120^\circ\text{C, 20 h, CH}_3\text{CN}]{\text{Cu(OTf)}_2 \text{ (10 mol\%), 1,10-phen (12 mol\%)}}</math> 3a</p> |                                 |                         |
|--------------------------------------------------------------------------------------------------------------------------------------------------------------------------------------------------------------------------------------------------------------------------------------------------------------------------|---------------------------------|-------------------------|
| entry                                                                                                                                                                                                                                                                                                                    | base                            | yield (%)               |
| 1                                                                                                                                                                                                                                                                                                                        | K <sub>2</sub> CO <sub>3</sub>  | 78%                     |
| 2                                                                                                                                                                                                                                                                                                                        | Na <sub>2</sub> CO <sub>3</sub> | 86% ( <sup>b</sup> 82%) |
| 3                                                                                                                                                                                                                                                                                                                        | NaHCO <sub>3</sub>              | 73%                     |
| 4                                                                                                                                                                                                                                                                                                                        | K <sub>3</sub> PO <sub>4</sub>  | 67%                     |
| 5                                                                                                                                                                                                                                                                                                                        | Na <sub>3</sub> PO <sub>4</sub> | 80%                     |
| 6                                                                                                                                                                                                                                                                                                                        | Cs <sub>2</sub> CO <sub>3</sub> | 57%                     |
| 7                                                                                                                                                                                                                                                                                                                        | NaOAc                           | 63%                     |
| 8                                                                                                                                                                                                                                                                                                                        | Li <sub>2</sub> CO <sub>3</sub> | 49%                     |

Reaction condition: 1a (0.2 mmol), 2 (3 equiv), Cu(OTf)<sub>2</sub> (10 mol%), 1,10-phen (12 mol%), base (3 equiv), GC yield. <sup>b</sup> isolated yield



**Table S3. Optimization of the Cu salt for reaction**

| entry | [Cu]                              | yield (%)               |
|-------|-----------------------------------|-------------------------|
| 1     | CuSO <sub>4</sub>                 | 67%                     |
| 2     | Cu(OTf) <sub>2</sub>              | 86% ( <sup>b</sup> 82%) |
| 3     | Cu(OAc) <sub>2</sub>              | 68%                     |
| 4     | CuCl <sub>2</sub>                 | 60%                     |
| 5     | Cu(NO <sub>3</sub> ) <sub>2</sub> | 73%                     |
| 6     | Cu(acac) <sub>2</sub>             | 70%                     |
| 7     | CuCN                              | 47%                     |
| 8     | CuCl                              | 58%                     |
| 9     | CuBr                              | 54%                     |
| 10    | CuI                               | 66%                     |

Reaction condition: **1a** (0.2 mmol), **2** (3 equiv), Cu salt (10 mol%), 1,10-phen (12 mol%), Na<sub>2</sub>CO<sub>3</sub> (3 equiv), GC yield. <sup>b</sup> isolated yield

**Table S4. Optimization of the solvent for reaction**

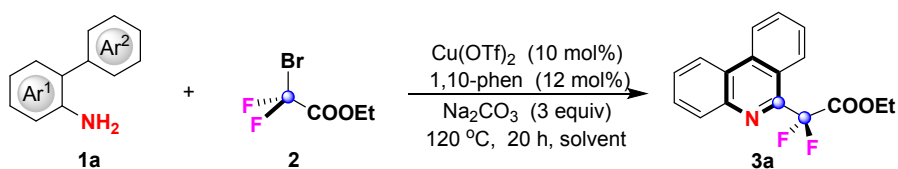

| entry | solvent                | yield (%)               |
|-------|------------------------|-------------------------|
| 1     | dioxane                | 77%                     |
| 2     | $\text{CH}_3\text{CN}$ | 86% ( <sup>b</sup> 82%) |
| 3     | toluene                | trace                   |
| 4     | THF                    | 79%                     |
| 5     | acetone                | 68%                     |
| 6     | DCE                    | 70%                     |
| 7     | DMF                    | 33%                     |
| 8     | DMSO                   | trace                   |
| 9     | $\text{CH}_3\text{OH}$ | 61%                     |
| 10    | DMOE                   | 42%                     |

Reaction condition: **1a** (0.2 mmol), **2** (3 equiv), Cu salt (10 mol%), 1,10-phen (12 mol%),  $\text{Na}_2\text{CO}_3$  (3 equiv), GC yield. <sup>b</sup> isolated yield, DMOE=1,2-Dimethoxyethane

**Table S5. Optimization of the ligand for reaction**

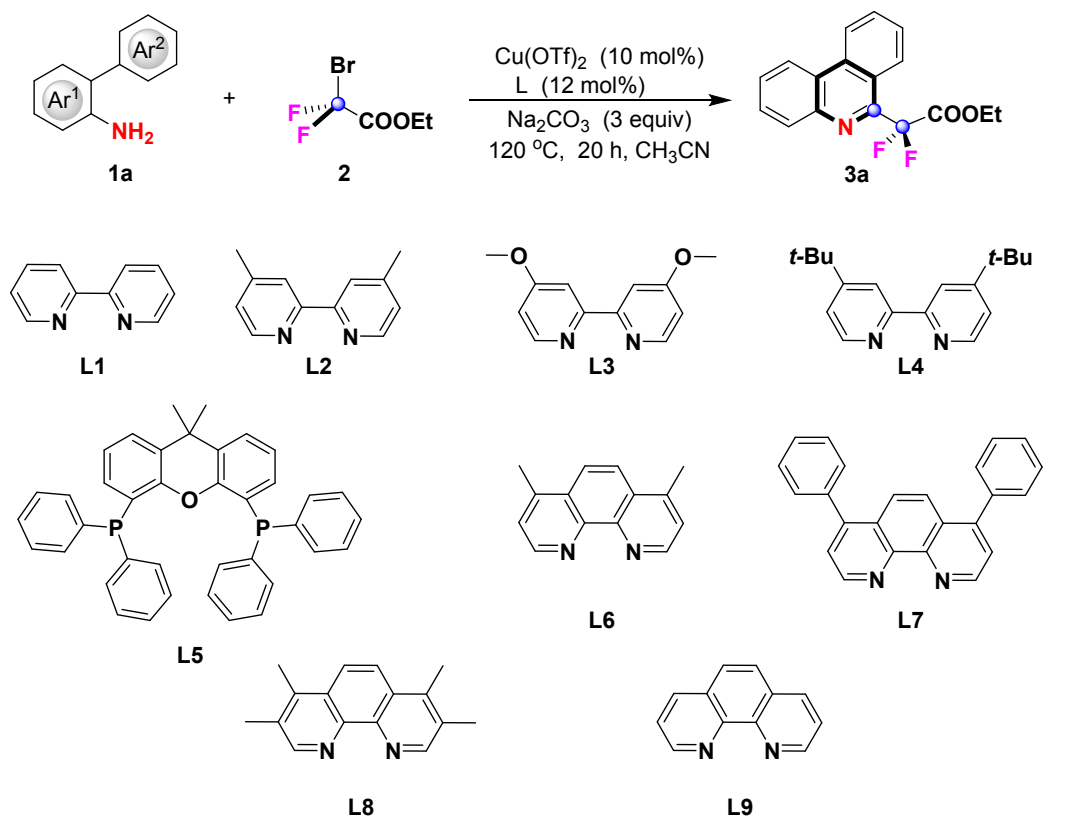

| entry | ligand    | yield (%)               |
|-------|-----------|-------------------------|
| 1     | <b>L1</b> | 69%                     |
| 2     | <b>L2</b> | 61%                     |
| 3     | <b>L3</b> | 66%                     |
| 4     | <b>L4</b> | 68%                     |
| 5     | <b>L5</b> | 77%                     |
| 6     | <b>L6</b> | 74%                     |
| 7     | <b>L7</b> | 71%                     |
| 8     | <b>L8</b> | 78%                     |
| 9     | <b>L9</b> | 86% ( <sup>b</sup> 82%) |

Reaction condition: **1a** (0.2 mmol), **2** (3 equiv),  $\text{Cu}(\text{OTf})_2$  (10 mol%), ligand (12 mol%),  $\text{Na}_2\text{CO}_3$  (3 equiv), GC yield. <sup>b</sup> isolated yield,

Table S6. Screening of the different difluoromethyl compounds

| 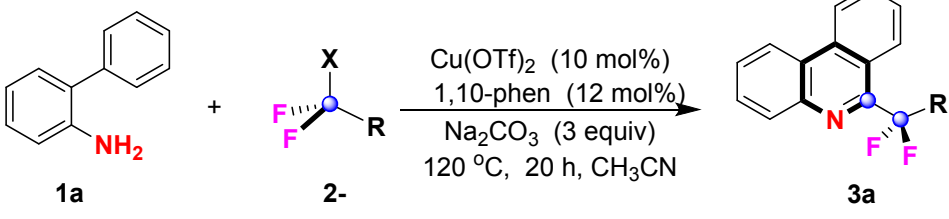 <p><b>1a</b> + <b>2-</b> <math>\xrightarrow[\text{Na}_2\text{CO}_3 \text{ (3 equiv)}]{\text{Cu(OTf)}_2 \text{ (10 mol\%)}, \text{1,10-phen (12 mol\%)}, 120^\circ\text{C}, 20 \text{ h}, \text{CH}_3\text{CN}}</math> <b>3a</b></p> |                                                                                                                                                                                                         |
|------------------------------------------------------------------------------------------------------------------------------------------------------------------------------------------------------------------------------------------------------------------------------------------------------------------------|---------------------------------------------------------------------------------------------------------------------------------------------------------------------------------------------------------|
| substrate                                                                                                                                                                                                                                                                                                              | products                                                                                                                                                                                                |
| <p><b>X=Br, R=COOEt</b><br/> <b>2</b><br/>           \$0.32/g</p>                                                                                                                                                                                                                                                      |  <p><b>3a</b> 82%</p>                                                                                                 |
| <p><b>X=Br, R=COOH</b><br/> <b>2-COOH</b><br/>           \$3.04/g</p>                                                                                                                                                                                                                                                  |  <p><b>6</b>, trace      68% (iso.)      <b>3-COOH</b> not detected</p>                                               |
| <p><b>X=Br, R=P(O)(OEt)<sub>2</sub></b><br/> <b>7</b><br/>           \$2.29/g</p>                                                                                                                                                                                                                                      | <p><b>6</b> + <b>3a</b> + <b>3-P(O)(OEt)<sub>2</sub></b><br/>           43% (iso.)      31% (iso.)      not detected</p>                                                                                |
| <p><b>X=Cl, R=COONa</b><br/> <b>2-COONa</b><br/>           \$0.52/g</p>                                                                                                                                                                                                                                                |  <p>35% GC yield      <b>3-COONa</b> not detected</p>                                                               |
| <p><b>X=Br, R=C(O)NCy<sub>2</sub></b><br/> <b>2-amide prepared</b></p>                                                                                                                                                                                                                                                 | <p><b>6</b> +  + <b>3-C(O)(NCy)<sub>2</sub></b><br/>           69% (GC)      detected by GCMS      not detected</p> |
| <p><b>X=Br, R=</b> <br/> <b>2-amide prepared</b></p>                                                                                                                                                                                | <p><b>6</b> + <b>3-C(O)NH-iprPh</b><br/>           trace      not detected</p>                                                                                                                          |
| <p><b>X=Br, R=</b> <br/> <b>2-amide prepared</b></p>                                                                                                                                                                                | <p><b>6</b> + <b>3-C(O)N(CH<sub>2</sub>)<sub>4</sub></b><br/>           trace      not detected</p>                                                                                                     |
| <p><b>X=Br, R=</b> <br/> <b>2-amide prepared</b></p>                                                                                                                                                                                | <p><b>6</b> + <b>3-C(O)morpholine</b><br/>           trace      not detected</p>                                                                                                                        |

### 3. General procedure for starting materials

#### (1). General experimental procedures for substrates 1

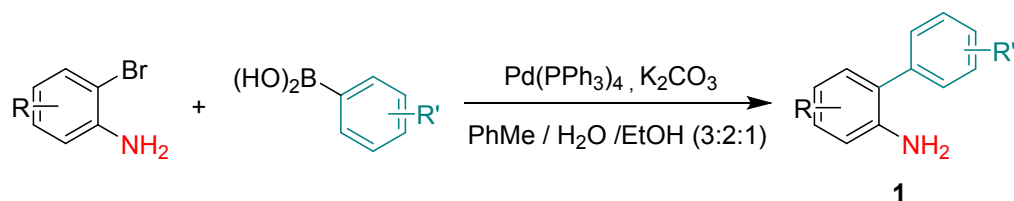

GP-I: In a dry 50 mL round bottom flask, phenylboronic acid (1.3 eq.),  $\text{K}_2\text{CO}_3$  (4.0 eq.) and  $\text{Pd(PPh}_3)_4$  (0.1 eq.) were dissolved in a mixture of toluene / water / ethanol (3:2:1, 0.1 M). 2-Bromoaniline (1.0 eq.) was added and the resulting mixture was heated to 95 °C for 20 hours. After cooling to room temperature, the biphasic solution was diluted with saturated aqueous  $\text{NH}_4\text{Cl}$  and  $\text{CH}_2\text{Cl}_2$  and the phases were separated. The aqueous phase was extracted twice with  $\text{CH}_2\text{Cl}_2$  (50 mL) and the combined organic phases were washed with water (1 x 50 mL) and saturated aqueous  $\text{NaHCO}_3$  (1 x 50 mL). The organic phases were dried over  $\text{Na}_2\text{SO}_4$  and filtered. The filtrate was concentrated in vacuo to afford the crude product. Purification by column chromatography on silica gel (petroleum ether / ethyl acetate) afforded the corresponding products.<sup>1</sup>

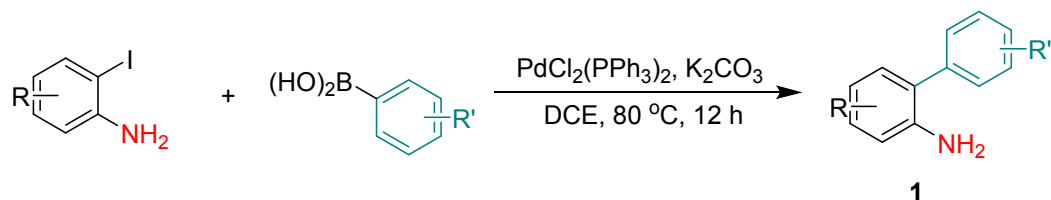

GP-II 2-Iodoaniline (10 mmol, 1.0 equiv), p-tolylboronic acid (12 mmol, 1.2 equiv) were added to a dry Schlenk flask. The flask was evacuated and backfilled with pure  $\text{N}_2$  for 3 times. DME (10 mL) and aqueous solution of  $\text{K}_2\text{CO}_3$  (2 M, 20 mL) were added with syringe and the mixture was stirred for 30 min at room temperature under  $\text{N}_2$  atmosphere. To the stirred mixture,  $\text{PdCl}_2(\text{PPh}_3)_2$  (0.2 mmol, 140 mg, 0.02 equiv) in DME (10 mL) was added with syringe at room temperature and the mixture was stirred at 80 °C for 12 h under  $\text{N}_2$  atmosphere (monitored by TLC). After the reaction was complete, the mixture was then cooled to room temperature and diluted with EtOAc (20 mL). The aqueous layer was extracted with EtOAc for 3 times (20 mL  $\times$  3). Then the organic phase was combined and dried over anhydrous  $\text{MgSO}_4$ . The solvent was removed under reduced pressure and the residue was purified by column chromatography on silica gel by using a 30:1 mixture of petroleum ether/EtOAc as an eluent to provide amine.<sup>2</sup>

## (2). General experimental procedures for substrates 5

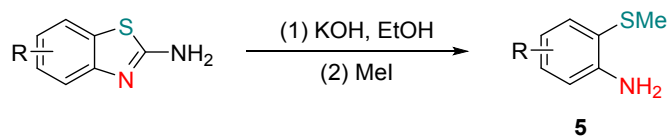

To the stirred solution of KOH (6 g) in 24 mL of water, benzothiazole (3 mmol) was added and refluxed for 17 h. After cooling to room temperature, MeI (3 mmol) was added drop wise and stirring was continued for an additional 1 h. The resultant reaction mixture extracted with diethyl ether (3 x 25 mL) combined organic layers dried over Na<sub>2</sub>SO<sub>4</sub>, filtered and concentrated in vacuum. Purification of the crude product was achieved by flash column chromatography using petrol ether/ethyl acetate (15:1) as eluent.

## 4. General process for the synthesis of B

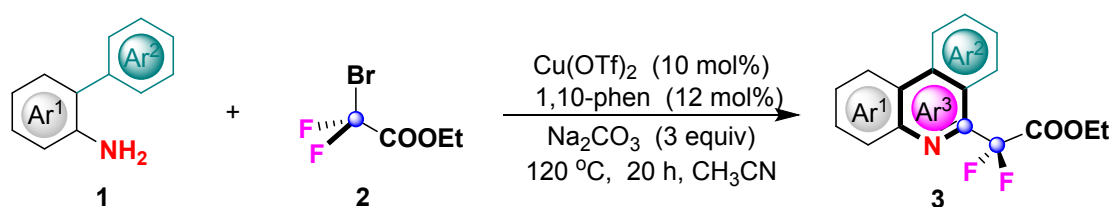

In a dried Schlenk tube were placed **1** (0.2 mol, 1 equiv), Na<sub>2</sub>CO<sub>3</sub> (0.6 mol, 3 equiv), Cu(OTf)<sub>2</sub> (0.02 mmol 0.1 equiv), 1,10-phen (0.024 mmol 0.12 equiv). **2** ( 0.6 mmol, 3 equiv) and solvent is added the mixture under N<sub>2</sub> atmosphere. The resulting mixture was stirred at 120 °C for 20 h. Upon completion of the reaction, the solvent was evaporated under reduced pressure and the residue was purified by flash column chromatograph (silica gel, petroleum ether:EtOAc = 100:1, v/v) to give the desired product **3**.

## 5. Crystal data of **3a**

Crystallographic data for compound **3a** (CCDC-1820711) has been deposited with the Cambridge Crystallographic Data Centre. Copies of the data can be obtained, free of charge, on application to CCDC (Email:deposit@ccdc.cam.ac.uk).

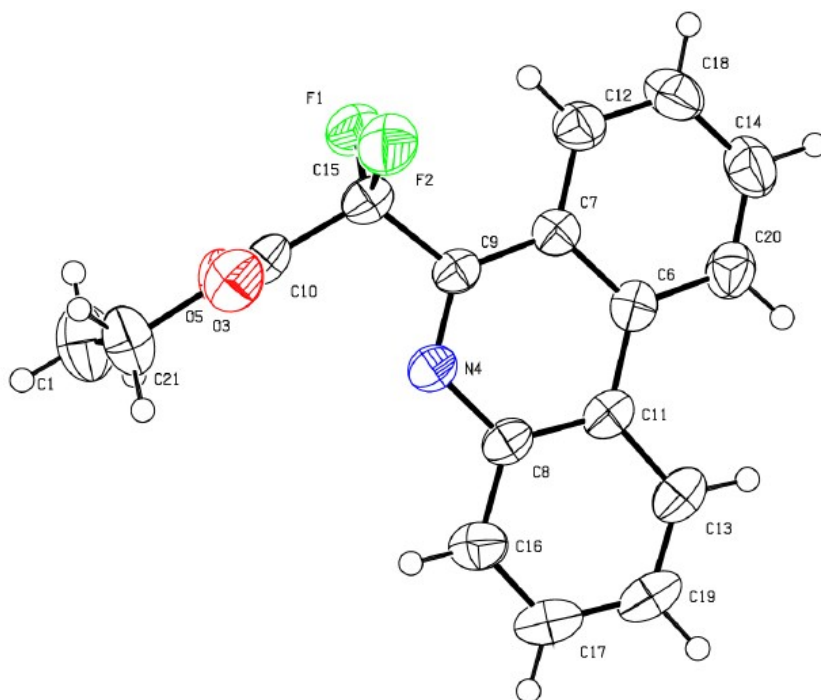

Bond precision: C-C = 0.0031 Å Wavelength=0.71073

Cell: a=8.3324(7) b=18.0049(15) c=18.9382(19)  
alpha=90 beta=90 gamma=90

Temperature: 296 K

|                        | Calculated      | Reported        |
|------------------------|-----------------|-----------------|
| Volume                 | 2841.2(4)       | 2841.2(4)       |
| Space group            | P b c a         | P b c a         |
| Hall group             | -P 2ac 2ab      | -P 2ac 2ab      |
| Moiety formula         | C17 H13 F2 N O2 | C17 H13 F2 N O2 |
| Sum formula            | C17 H13 F2 N O2 | C17 H13 F2 N O2 |
| Mr                     | 301.28          | 301.29          |
| Dx, g cm <sup>-3</sup> | 1.409           | 1.409           |
| Z                      | 8               | 8               |
| Mu (mm <sup>-1</sup> ) | 0.110           | 0.110           |
| F000                   | 1248.0          | 1248.8          |
| F000'                  | 1248.76         |                 |
| h,k,lmax               | 9,21,22         | 9,21,22         |
| Nref                   | 2494            | 2487            |
| Tmin,Tmax              |                 | 0.419,1.000     |
| Tmin'                  |                 |                 |

Correction method= # Reported T Limits: Tmin=0.419 Tmax=1.000  
AbsCorr = MULTI-SCAN

Data completeness= 0.997 Theta(max)= 24.990

R(reflections)= 0.0445( 1797) wR2(reflections)= 0.1237( 2487)

S = 1.061 Npar= 199



## 6. Optimization of experiment conditions for 5

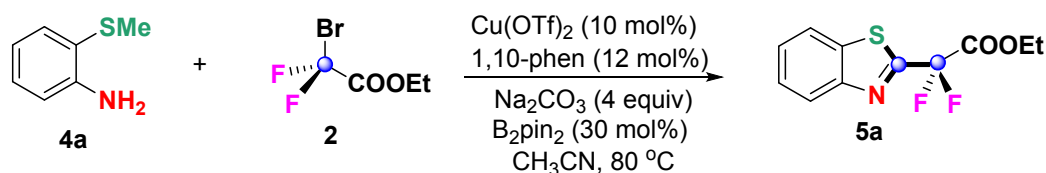

| entry          | [Cu]                      | ligand    | additive                 | base                     | solvent                | yield (%)            |
|----------------|---------------------------|-----------|--------------------------|--------------------------|------------------------|----------------------|
| 1              | $\text{Cu}(\text{OTf})_2$ | 1,10-phen | ----                     | $\text{Na}_2\text{CO}_3$ | $\text{CH}_3\text{CN}$ | 74                   |
| 2              | $\text{Cu}(\text{OTf})_2$ | 1,10-phen | $\text{B}_2\text{pin}_2$ | $\text{Na}_2\text{CO}_3$ | $\text{CH}_3\text{CN}$ | 83 (78) <sup>b</sup> |
| 3              | $\text{Cu}(\text{OTf})_2$ | 1,10-phen | $\text{B}_2\text{pin}_2$ | $\text{Na}_2\text{CO}_3$ | THF                    | 67                   |
| 4              | $\text{CuSO}_4$           | 1,10-phen | $\text{B}_2\text{pin}_2$ | $\text{Na}_2\text{CO}_3$ | $\text{CH}_3\text{CN}$ | 47                   |
| 5              | $\text{Cu}(\text{OTf})_2$ | Xantphos  | $\text{B}_2\text{pin}_2$ | $\text{Na}_2\text{CO}_3$ | $\text{CH}_3\text{CN}$ | 60                   |
| 6              | $\text{Cu}(\text{OTf})_2$ | 1,10-phen | $\text{B}_2\text{pin}_2$ | $\text{K}_2\text{CO}_3$  | $\text{CH}_3\text{CN}$ | 69                   |
| 7              | $\text{Cu}(\text{OTf})_2$ | 1,10-phen | $\text{B}_2\text{pin}_2$ | DBU                      | $\text{CH}_3\text{CN}$ | 23                   |
| 8 <sup>c</sup> | $\text{Cu}(\text{OTf})_2$ | 1,10-phen | $\text{B}_2\text{pin}_2$ | $\text{Na}_2\text{CO}_3$ | $\text{CH}_3\text{CN}$ | 54                   |

<sup>a</sup> Reaction conditions: **4a** (0.2 mmol), ethyl bromodifluoroacetate (**2**) (3 equiv), [Cu] (10 mol%), ligand (12 mol%),  $\text{B}_2\text{pin}_2$  (30 mol%), base (4 equiv),  $\text{CH}_3\text{CN}$  (2 mL) under  $\text{N}_2$  atmosphere at 80 °C for 24 h. GC yields. <sup>b</sup> Isolated yields. <sup>c</sup> 12 h

## 7. General process for the synthesis of 5

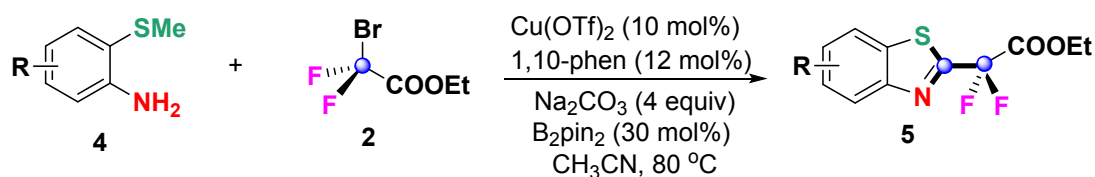

In a dried Schlenk tube were placed **4** (0.2 mol, 1 equiv),  $\text{Na}_2\text{CO}_3$  (0.8 mol, 4 equiv),  $\text{Cu}(\text{OTf})_2$  (0.02 mmol 0.1 equiv), 1,10-phen (0.024 mmol 0.12 equiv). **2** (0.6 mmol, 3 equiv),  $\text{B}_2\text{pin}_2$  (0.06 mmol 0.3 equiv) and solvent  $\text{CH}_3\text{CN}$  is added the mixture under  $\text{N}_2$  atmosphere. The resulting mixture was stirred at 80 °C for 24 h. Upon completion of the reaction, the solvent was evaporated under reduced pressure and the residue was purified by flash column chromatograph (silica gel, petroleum ether:EtOAc = 100:1, v/v) to give the desired product **5**.

## 8. Control experiments to figure out the key intermediate for this transformation

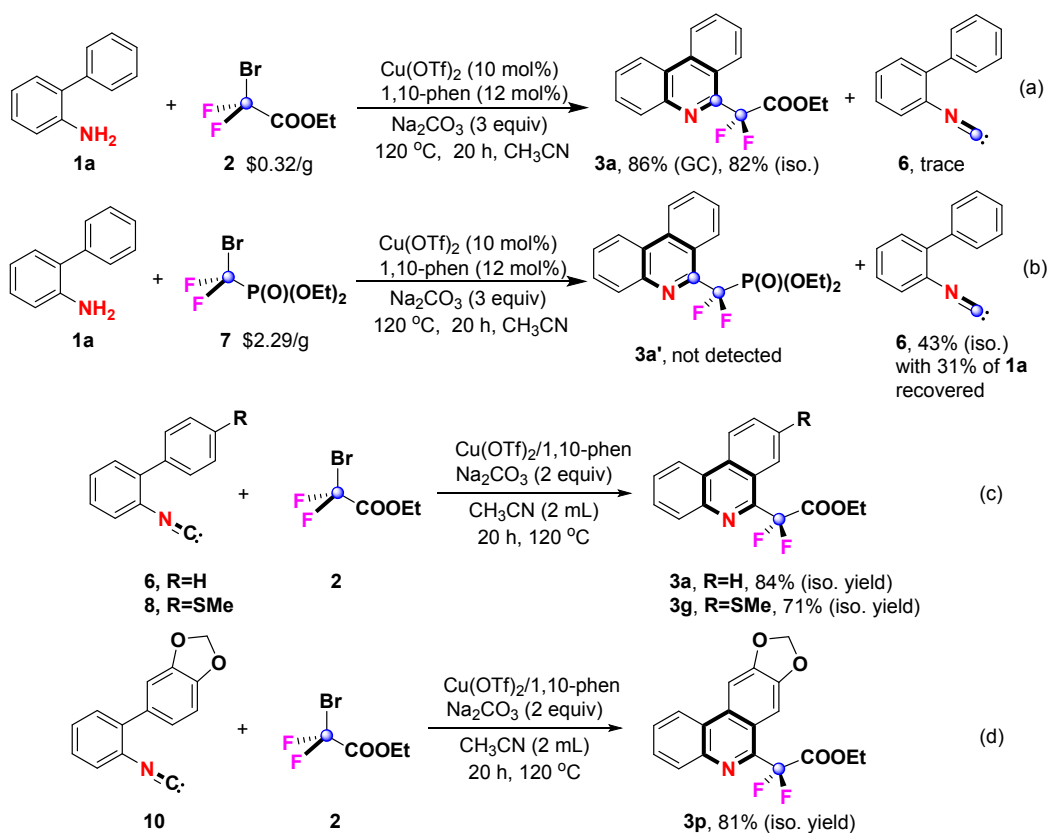

## 9. Control experiments to figure out the formation of isocyanides from amines

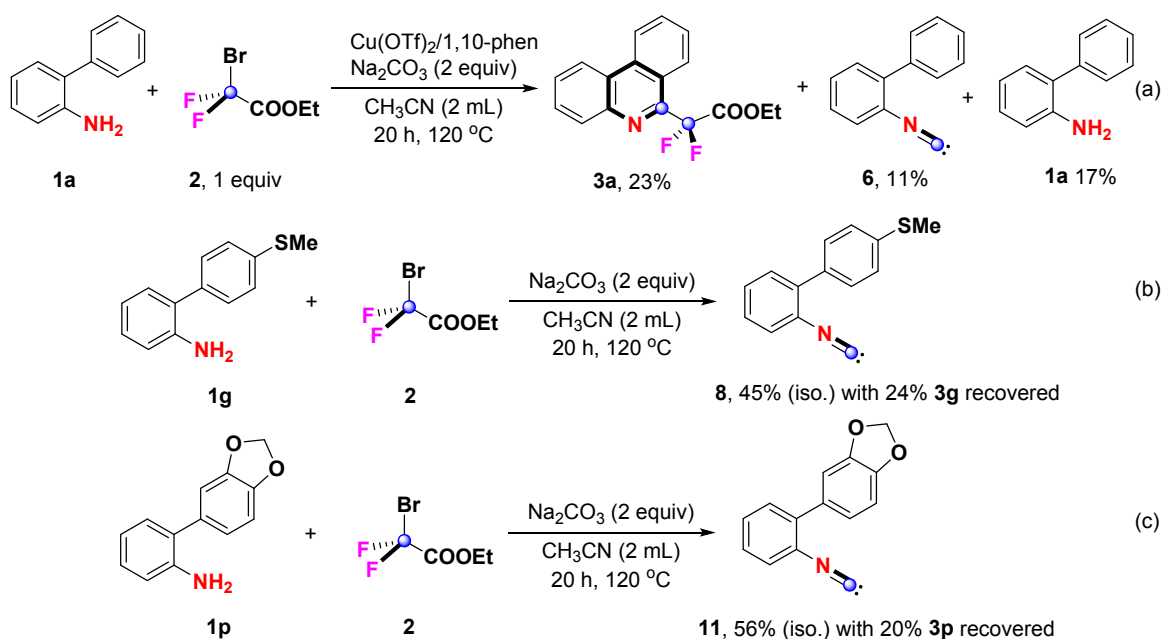

## 10. Control experiments and radical trapping experiments.

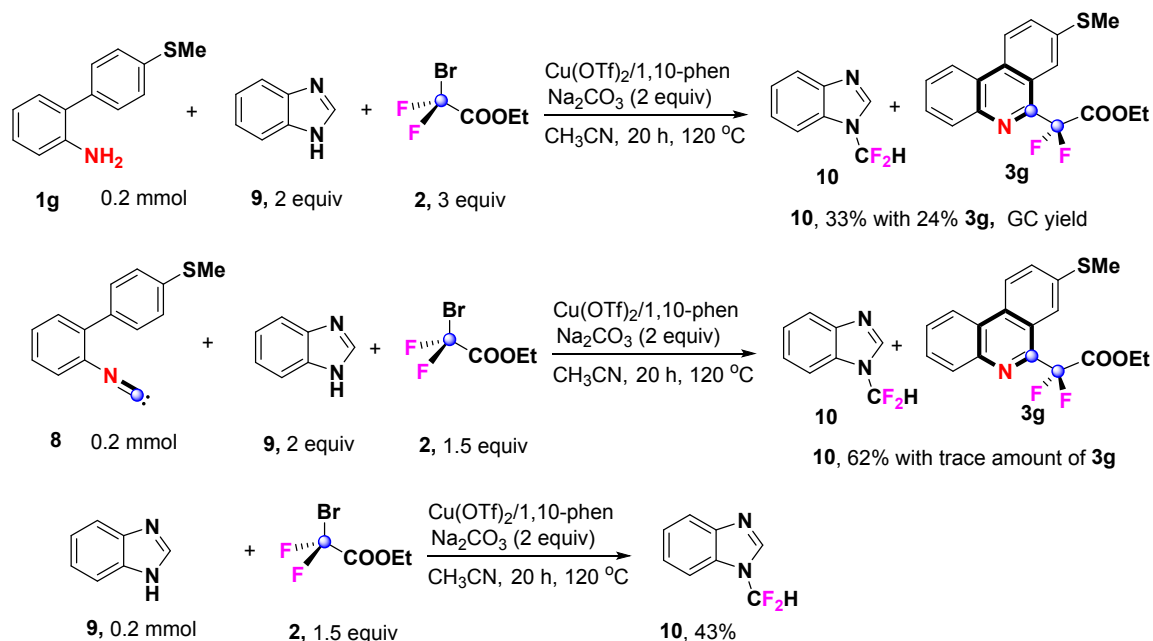

## 11. Computation

### Computational Methods

All calculations were carried out with the Gaussian 09 program. Geometries were optimized using the B3LYP density functional with the LANL2DZ basis set for Br and the 6-31G basis set for other atoms. Harmonic frequency analysis was conducted at the same level of theory to verify the stationary points to be real minima or saddle points and to obtain the thermal corrections at 298.15 K. Intrinsic reaction coordinate (IRC) calculations were carried out to ensure that the transition states connect the correct reactants and products. Single-point energies were calculated at optimized gas-phase geometries at the M06-2X/6-311G(d,p) level and solvent effects were introduced with the SMD approach. In the single-point calculations, thermal corrections were added to obtain Gibbs free energies (kcal/mol).

Gaussian 09, Revision D.01, Frisch, M. J.; Trucks, G. W.; Schlegel, H. B.; Scuseria, G. E.; Robb, M. A.; Cheeseman, J. R.; Scalmani, G.; Barone, V.; Mennucci, B.; Petersson, G. A.; Nakatsuji, H.; Caricato, M.; Li, X.; Hratchian, H. P.; Izmaylov, A. F.; Bloino, J.; Zheng, G.; Sonnenberg, J. L.; Hada, M.; Ehara, M.; Toyota, K.; Fukuda, R.; Hasegawa, J.; Ishida, M.; Nakajima, T.; Honda, Y.; Kitao, O.; Nakai, H.; Vreven, T.; Montgomery, J. A., Jr.; Peralta, J. E.; Ogliaro, F.; Bearpark, M.; Heyd, J. J.; Brothers, E.; Kudin, K. N.; Staroverov, V. N.; Kobayashi, R.; Normand, J.; Raghavachari, K.; Rendell, A.; Burant, J. C.; Iyengar, S. S.; Tomasi, J.; Cossi, M.; Rega, N.; Millam, N. J.; Klene, M.; Knox, J. E.; Cross, J. B.; Bakken, V.; Adamo, C.; Jaramillo, J.; Gomperts, R.; Stratmann, R. E.; Yazyev, O.; Austin, A. J.; Cammi, R.; Pomelli, C.; Ochterski, J. W.; Martin, R. L.; Morokuma, K.; Zakrzewski, V. G.; Voth,

G. A.; Salvador, P.; Dannenberg, J. J.; Dapprich, S.; Daniels, A. D.; Farkas, Ö.; Foresman, J. B.; Ortiz, J. V.; Cioslowski, J.; Fox, D. J. Gaussian, Inc., Wallingford CT, 2010.

## Computational Results

Aniline was used as model molecule of amine substrate for computational study. Free energies are given in kcal/mol.

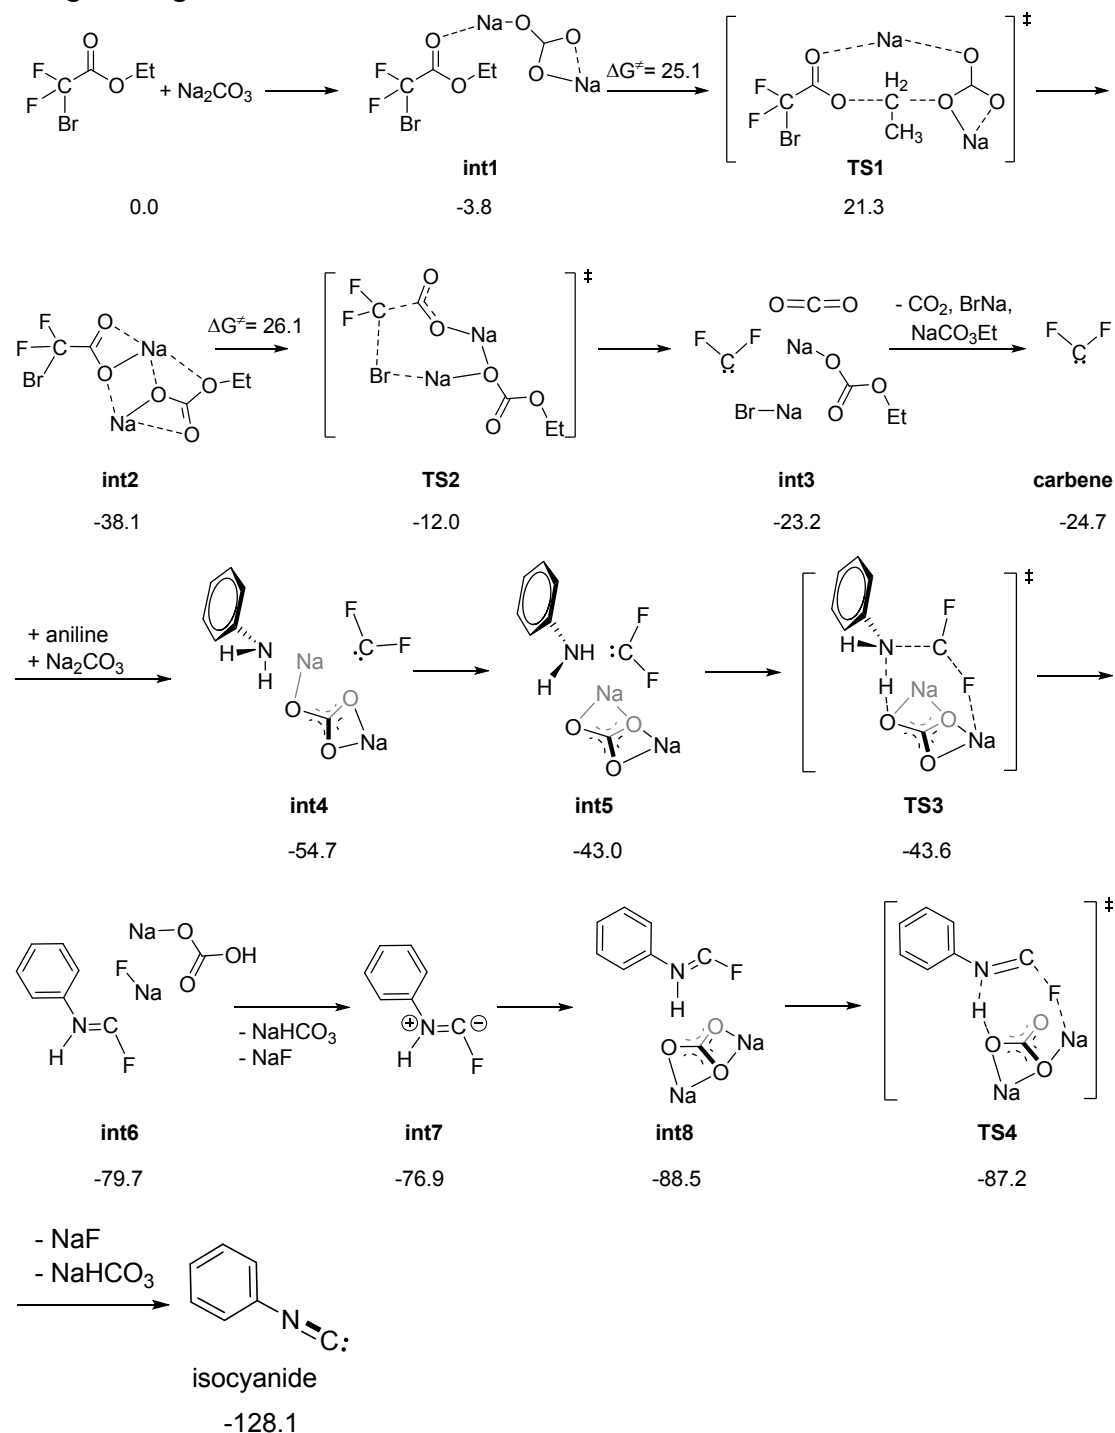

## 12. Characterization data for products

### ethyl 2,2-difluoro-2-(phenanthridin-6-yl)acetate (3a)<sup>3</sup>

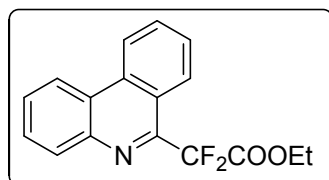

The reaction was performed following the general procedure. The residue was purified by flash column chromatograph (silica gel, petroleum ether:AcOEt = 100:1, v/v) to give the product as a white solid (49.3 mg 82%). <sup>1</sup>H NMR (500 MHz, CDCl<sub>3</sub>) δ 8.67 (d, *J* = 8.4 Hz, 1H), 8.61 – 8.53 (m, 2H), 8.12 (dd, *J* = 5.9, 3.6 Hz, 1H), 7.94 – 7.87 (m, 1H), 7.78 – 7.71 (m, 3H), 4.57 (q, *J* = 7.1 Hz, 2H), 1.48 (t, *J* = 7.1 Hz, 3H). <sup>13</sup>C NMR (125 MHz, CDCl<sub>3</sub>) δ 163.7 (t, *J* = 31.3 Hz), 150.15 (t, *J* = 28.8 Hz), 141.7, 133.8, 131.2, 130.8, 129.0, 128.9, 127.8, 126.23 (t, *J* = 4.8 Hz), 124.8, 122.5, 122.3 (t, *J* = 2.5 Hz), 122.0, 115.81 (t, *J* = 252.5 Hz), 63.0, 14.1. <sup>19</sup>F NMR (470 MHz, CDCl<sub>3</sub>) δ -98.8.

### ethyl 2,2-difluoro-2-(8-methylphenanthridin-6-yl)acetate (3b)

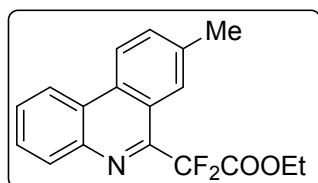

The reaction was performed following the general procedure. The residue was purified by flash column chromatograph (silica gel, petroleum ether:AcOEt = 100:1, v/v) to give the product as a white solid (82%). <sup>1</sup>H NMR (500 MHz, CDCl<sub>3</sub>) δ 8.59 – 8.50 (m, 2H), 8.32 (d, *J* = 0.7 Hz, 1H), 8.15 – 8.05 (m, 1H), 7.77 – 7.68 (m, 3H), 4.57 (q, *J* = 7.1 Hz, 2H), 2.62 (s, 3H), 1.48 (t, *J* = 7.1 Hz, 3H). <sup>13</sup>C NMR (125 MHz, CDCl<sub>3</sub>) 163.7 (t, *J* = 30 Hz), 149.9 (t, *J* = 30 Hz), 141.5, 138.0, 133.1, 131.8, 130.8, 128.8, 128.5, 125.5 (t, *J* = 3.8 Hz), 125.0, 125.0 (t, *J* = 2.5 Hz), 122.4 121.9, 116.0 (t, *J* = 252.5 Hz), 63.0, 21.9, 14.1. <sup>19</sup>F NMR (470 MHz, CDCl<sub>3</sub>) δ -98.9.

HRMS (ESI, *m/z*) calcd for C<sub>18</sub>H<sub>16</sub>F<sub>2</sub>NO<sub>2</sub>[M+H]<sup>+</sup>: 316.1149; found: 316.1145.

### ethyl 2-(8-ethylphenanthridin-6-yl)-2,2-difluoroacetate (3c)

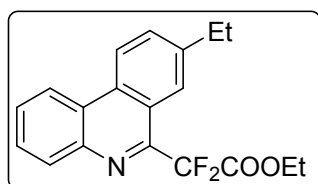

The reaction was performed following the general procedure. The residue was purified by flash column chromatograph (silica gel, petroleum ether:AcOEt = 100:1, v/v) to give the product as a white solid (83%). <sup>1</sup>H NMR (500 MHz, CDCl<sub>3</sub>) δ 8.62 (d, *J* = 8.5 Hz, 1H), 8.60 – 8.50 (m, 1H), 8.36 (d, *J* = 1.1 Hz, 1H), 8.16 – 8.09 (m, 1H), 7.83 – 7.71 (m, 3H), 4.59 (q, *J* = 7.1 Hz, 2H), 2.95 (q, *J* = 7.6 Hz, 2H), 1.50 (t, *J* = 7.1 Hz, 3H), 1.41 (t, *J* = 7.6 Hz, 3H). <sup>13</sup>C NMR (125 MHz, CDCl<sub>3</sub>) δ 163.8 (t, *J* = 31.3 Hz), 150.0 (t, *J* = 28.8 Hz), 144.2, 141.5, 132.0, 132.0, 130.8, 128.8, 128.5, 125.0, 124.40 (t, *J* = 5.0 Hz), 122.6 (t, *J* = 2.5 Hz), 122.5, 121.9, 115.9 (t, *J* = 251.3 Hz), 63.0, 29.2, 15.5, 14.1. <sup>19</sup>F NMR (470 MHz, CDCl<sub>3</sub>) δ -99.0.

HRMS (ESI, *m/z*) calcd for C<sub>19</sub>H<sub>18</sub>F<sub>2</sub>NO<sub>2</sub>[M+H]<sup>+</sup>: 330.1306; found: 330.1302.

### ethyl 2,2-difluoro-2-(8-isopropylphenanthridin-6-yl)acetate (3d)

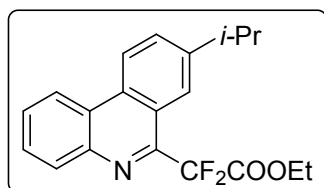

The reaction was performed following the general procedure. The residue was purified by flash column chromatograph (silica gel, petroleum ether:AcOEt = 100:1, v/v) to give the product as a white solid (83%).

$^1\text{H}$  NMR (500 MHz,  $\text{CDCl}_3$ )  $\delta$  8.61 (d,  $J$  = 8.6 Hz, 1H), 8.58 – 8.52 (m, 1H), 8.37 (d,  $J$  = 1.8 Hz, 1H), 8.16 – 8.07 (m, 1H), 7.81 (dd,  $J$  = 8.6, 1.7 Hz, 1H), 7.76 – 7.63 (m, 2H), 4.56 (q,  $J$  = 7.1 Hz, 2H), 3.19 (dt,  $J$  = 13.8, 6.9 Hz, 1H), 1.47 (t,  $J$  = 7.1 Hz, 3H), 1.40 (d,  $J$  = 6.9 Hz, 6H).  $^{13}\text{C}$  NMR (125 MHz,  $\text{CDCl}_3$ )  $\delta$  163.8 (t,  $J$  = 31.3 Hz), 150.0 (t,  $J$  = 28.8 Hz), 148.8, 141.5, 132.2, 130.8, 130.5, 128.8, 128.5, 125.0, 123.10 (t,  $J$  = 5.0 Hz), 122.6 (t,  $J$  = 5 Hz), 122.6, 121.9, 115.9 (t,  $J$  = 252.5 Hz), 63.0, 34.4, 23.9, 14.1.  $^{19}\text{F}$  NMR (470 MHz,  $\text{CDCl}_3$ )  $\delta$  -99.1. HRMS (ESI,  $m/z$ ) calcd for  $\text{C}_{20}\text{H}_{20}\text{F}_2\text{NO}_2[\text{M}+\text{H}]^+$ : 344.1462; found: 344.1460.

### ethyl 2,2-difluoro-2-(8-propylphenanthridin-6-yl)acetate (3e)

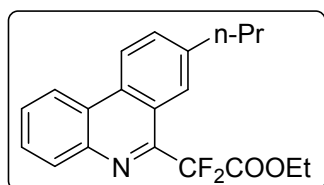

The reaction was performed following the general procedure. The residue was purified by flash column chromatograph (silica gel, petroleum ether:AcOEt = 100:1, v/v) to give the product as a yellow oil (77%).  $^1\text{H}$  NMR (500 MHz,  $\text{CDCl}_3$ )  $\delta$  8.58 (d,  $J$  = 8.5 Hz, 1H), 8.56 – 8.51 (m, 1H), 8.32 (d,  $J$  = 1.5 Hz, 1H), 8.22 – 8.01 (m, 1H), 7.79 – 7.65 (m, 3H), 4.57 (q,  $J$  = 7.1 Hz, 2H), 2.93 – 2.80 (m, 2H), 1.84 – 1.73 (m, 2H), 1.48 (t,  $J$  = 7.1 Hz, 3H), 1.01 (t,  $J$  = 7.3 Hz, 3H).

$^{13}\text{C}$  NMR (125 MHz,  $\text{CDCl}_3$ )  $\delta$  163.8 (t,  $J$  = 30 Hz), 149.94 (t,  $J$  = 28.8 Hz), 142.7, 141.5, 132.4, 132.0, 130.8, 128.8, 128.5, 125.1 (t,  $J$  = 6.3 Hz), 125.0, 122.5 (t,  $J$  = 2.5 Hz), 122.4, 121.9, 115.9 (t,  $J$  = 252.5 Hz), 63.0, 38.2, 24.5, 14.1, 13.8.  $^{19}\text{F}$  NMR (470 MHz,  $\text{CDCl}_3$ )  $\delta$  -99.1.

HRMS (ESI,  $m/z$ ) calcd for  $\text{C}_{20}\text{H}_{20}\text{F}_2\text{NO}_2[\text{M}+\text{H}]^+$ : 344.1462; found: 344.1458.

### ethyl 2-(8-(tert-butyl)phenanthridin-6-yl)-2,2-difluoroacetate (3f)

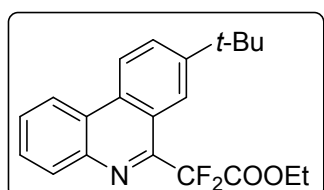

The reaction was performed following the general procedure. The residue was purified by flash column chromatograph (silica gel, petroleum ether:AcOEt = 100:1, v/v) to give the product as a yellow oil (76%).  $^1\text{H}$  NMR (500 MHz,  $\text{CDCl}_3$ )  $\delta$  8.60 (d,  $J$  = 8.8 Hz, 1H), 8.54 (dd,  $J$  = 5.7, 3.7 Hz, 2H), 8.16 – 8.07 (m, 1H), 7.98 (dd,  $J$  = 8.8, 1.9 Hz, 1H), 7.76 – 7.68 (m, 2H), 4.56 (q,  $J$  = 7.1 Hz, 2H), 1.52 – 1.43 (m, 12H).

$^{13}\text{C}$  NMR (125 MHz,  $\text{CDCl}_3$ )  $\delta$  163.6 (t,  $J$  = 30 Hz), 151.0, 150.2 (t,  $J$  = 28.8 Hz), 141.6, 131.8, 130.8, 129.7, 128.8, 128.6, 124.9, 122.4 (t,  $J$  = 1.3 Hz), 122.3, 121.9, 121.8 (t,  $J$  = 5.0 Hz), 115.84 (t,  $J$  = 252.5 Hz), 63.0, 35.3, 31.2, 14.1.  $^{19}\text{F}$  NMR (470 MHz,  $\text{CDCl}_3$ )  $\delta$  -99.2.

HRMS (ESI,  $m/z$ ) calcd for  $\text{C}_{21}\text{H}_{22}\text{F}_2\text{NO}_2[\text{M}+\text{H}]^+$ : 358.1619; found: 358.1615.

### Ethyl 2,2-difluoro-2-(8-(methylthio)phenanthridin-6-yl)acetate (3g)

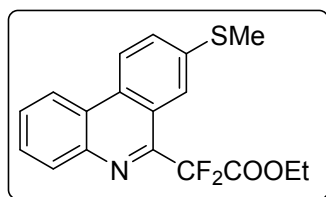

The reaction was performed following the general procedure. The residue was purified by flash column chromatograph (silica gel, petroleum ether:AcOEt = 100:1, v/v) to give the product as a white solid (78%). <sup>1</sup>H NMR (500 MHz, CDCl<sub>3</sub>) δ 8.65 – 8.39 (m, 2H), 8.25 (d, *J* = 1.9 Hz, 1H), 8.16 – 8.01 (m, 1H), 7.72 (ddt, *J* = 14.3, 6.8, 3.4 Hz, 3H), 4.56 (q, *J* = 7.1 Hz, 2H), 2.64 (s, 3H), 1.47 (t, *J* = 7.1 Hz, 3H). <sup>13</sup>C NMR (125 MHz, CDCl<sub>3</sub>) δ 163.60 (t, *J* = 31.3 Hz), 149.08 (t, *J* = 28.8 Hz), 141.4, 139.6, 131.1, 130.9, 130.0, 129.1, 128.7, 124.8, 122.9 (t, *J* = 17.5 Hz), 122.7, 121.7, 121.1 (t, *J* = 5.0 Hz), 115.8, 63.1, 15.4, 14.1. <sup>19</sup>F NMR (470 MHz, CDCl<sub>3</sub>) δ -99.33 (s). HRMS (ESI, *m/z*) calcd for C<sub>18</sub>H<sub>16</sub>F<sub>2</sub>NO<sub>2</sub>S[M+H]<sup>+</sup>: 348.0870; found: 348.0876.

### ethyl 2,2-difluoro-2-(8-methoxyphenanthridin-6-yl)acetate (3h)<sup>4</sup>

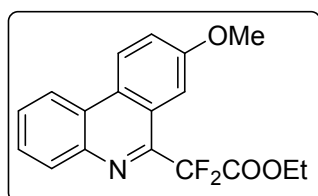

The reaction was performed following the general procedure. The residue was purified by flash column chromatograph (silica gel, petroleum ether:AcOEt = 100:1, v/v) to give the product as a white solid (58.3 mg, 88%). <sup>1</sup>H NMR (500 MHz, CDCl<sub>3</sub>) δ 8.55 (d, *J* = 9.2 Hz, 1H), 8.49 – 8.44 (m, 1H), 8.08 (dd, *J* = 7.9, 1.5 Hz, 1H), 7.89 – 7.83 (m, 1H), 7.74 – 7.64 (m, 2H), 7.51 (dd, *J* = 9.1, 2.6 Hz, 1H), 4.57 (q, *J* = 7.1 Hz, 2H), 3.99 (s, 3H), 1.48 (t, *J* = 7.1 Hz, 3H). <sup>13</sup>C NMR (125 MHz, CDCl<sub>3</sub>) δ 163.7 (t, *J* = 31.3 Hz), 158.8, 148.1 (t, *J* = 28.8 Hz), 140.9, 130.7, 128.9, 128.3, 127.9, 125.0, 124.0, 123.6 (t, *J* = 2.5 Hz), 122.3, 121.5, 115.9 (t, *J* = 251.3 Hz), 105.7 (t, *J* = 5 Hz), 63.0, 55.5, 14.1. <sup>19</sup>F NMR (470 MHz, CDCl<sub>3</sub>) δ -99.9.

### ethyl 2,2-difluoro-2-(8-fluorophenanthridin-6-yl)acetate (3i)

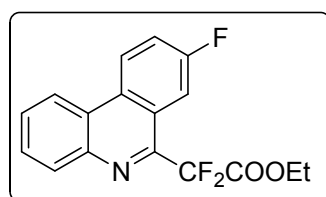

The reaction was performed following the general procedure. The residue was purified by flash column chromatograph (silica gel, petroleum ether:AcOEt = 100:1, v/v) to give the product as a white solid (47 mg, 74%). <sup>1</sup>H NMR (500 MHz, CDCl<sub>3</sub>) δ 8.63 (dd, *J* = 9.2, 5.3 Hz, 1H), 8.52 – 8.42 (m, 1H), 8.17 (ddd, *J* = 9.7, 4.3, 2.0 Hz, 1H), 8.12 – 7.96 (m, 1H), 7.79 – 7.69 (m, 2H), 7.63 (ddd, *J* = 9.1, 8.0, 2.6 Hz, 1H), 4.58 (q, *J* = 7.1 Hz, 2H), 1.49 (t, *J* = 7.1 Hz, 3H). <sup>13</sup>C NMR (125 MHz, CDCl<sub>3</sub>) δ 163.37 (t, *J* = 31.3 Hz), 162.3, 160.4, 149.4 (t, *J* = 28.8 Hz), 149.3 (t, *J* = 30.0 Hz), 141.4, 130.9, 130.6, 129.4, 128.9, 125.1 (d, *J* = 7.5 Hz), 124.4, 123.4 (t, *J* = 1.25 Hz), 123.3 (t, *J* = 1.25 Hz), 121.8, 120.8 (d, *J* = 23.8 Hz), 115.6 (t, *J* = 252.5 Hz), 111.2 (t, *J* = 5 Hz), 111.0 (t, *J* = 5 Hz), 63.1, 14.1. <sup>19</sup>F NMR (470 MHz, CDCl<sub>3</sub>) δ -99.3, -110.3. HRMS (ESI, *m/z*) calcd for C<sub>17</sub>H<sub>13</sub>F<sub>3</sub>NO<sub>2</sub>[M+H]<sup>+</sup>: 320.0898; found: 320.0894.

### ethyl 2-(8-chlorophenanthridin-6-yl)-2,2-difluoroacetate (3j)<sup>4</sup>

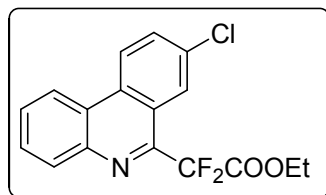

The reaction was performed following the general procedure. The residue was purified by flash column chromatograph (silica gel, petroleum ether:AcOEt = 100:1, v/v) to give the product as a white solid (77%). <sup>1</sup>H NMR (500 MHz, CDCl<sub>3</sub>) δ 8.59 (d, *J* = 8.9 Hz, 1H), 8.55 – 8.43 (m, 2H), 8.09 (dd, *J* = 5.9, 3.6 Hz, 1H), 7.83 (dd, *J* = 8.9, 2.1 Hz, 1H), 7.80 – 7.71 (m, 2H), 4.58 (q, *J* = 7.1 Hz, 2H), 1.49 (t, *J* = 7.1 Hz, 3H). <sup>13</sup>C NMR (125 MHz, CDCl<sub>3</sub>) δ 163.33 (t, *J* = 30.0 Hz), 149.2 (t, *J* = 28.8 Hz), 141.6, 134.1, 132.2, 131.9, 131.0, 129.4, 129.4, 125.6 (t, *J* = 5 Hz), 124.3, 124.2, 123.1 (t, *J* = 1.25 Hz), 121.9, 115.6 (t, *J* = 252.5 Hz), 63.1, 14.1. <sup>19</sup>F NMR (470 MHz, CDCl<sub>3</sub>) δ -98.8.

### ethyl 2-(8-bromophenanthridin-6-yl)-2,2-difluoroacetate (3k)

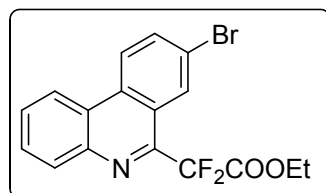

The reaction was performed following the general procedure. The residue was purified by flash column chromatograph (silica gel, petroleum ether:AcOEt = 100:1, v/v) to give the product as a white solid (72%). <sup>1</sup>H NMR (500 MHz, CDCl<sub>3</sub>) δ 8.65 (dd, *J* = 3.7, 1.8 Hz, 1H), 8.55 – 8.40 (m, 2H), 8.24 – 8.01 (m, 1H), 7.93 (dd, *J* = 8.9, 2.0 Hz, 1H), 7.74 (dt, *J* = 5.5, 3.2 Hz, 2H), 4.58 (q, *J* = 7.1 Hz, 2H), 1.49 (t, *J* = 7.1 Hz, 3H). <sup>13</sup>C NMR (125 MHz, CDCl<sub>3</sub>) δ 163.32 (t, *J* = 30.0 Hz), 149.00 (t, *J* = 31.3 Hz), 141.6, 134.5, 132.5, 130.9, 129.4, 129.4, 128.6 (t, *J* = 5 Hz), 124.2, 123.34 (t, *J* = 2.5 Hz), 122.2, 121.9, 115.6 (t, *J* = 252.5 Hz), 63.2, 14.1. <sup>19</sup>F NMR (470 MHz, CDCl<sub>3</sub>) δ -98.6.

HRMS (ESI, *m/z*) calcd for C<sub>17</sub>H<sub>13</sub>BrF<sub>2</sub>NO<sub>2</sub>[M+H]<sup>+</sup>: 380.0098; found: 380.0093.

### ethyl 2,2-difluoro-2-(8-phenylphenanthridin-6-yl)acetate (3l)<sup>4</sup>

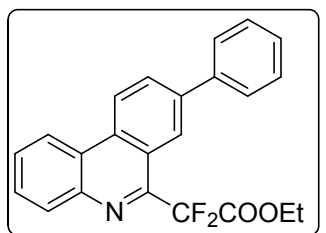

The reaction was performed following the general procedure. The residue was purified by flash column chromatograph (silica gel, petroleum ether:AcOEt = 100:1, v/v) to give the product as a yellow oil (73%). <sup>1</sup>H NMR (500 MHz, CDCl<sub>3</sub>) δ 8.77 (dd, *J* = 7.7, 5.4 Hz, 2H), 8.67 – 8.59 (m, 1H), 8.23 – 8.11 (m, 2H), 7.84 – 7.76 (m, 4H), 7.61 – 7.54 (m, 2H), 7.51 – 7.44 (m, 1H), 4.61 (q, *J* = 7.1 Hz, 2H), 1.51 (t, *J* = 7.1 Hz, 3H). <sup>13</sup>C NMR (125 MHz, CDCl<sub>3</sub>) δ 163.7 (t, *J* = 31.3 Hz), 150.24 (t, *J* = 28.8 Hz), 141.7, 140.6, 139.9, 132.9, 130.9, 130.5, 129.2, 129.0, 129.0, 128.1, 127.5, 124.7, 124.09 (t, *J* = 4.8 Hz), 123.1, 122.7 (t, *J* = 1.7 Hz), 122.1, 115.9 (t, *J* = 253.8 Hz), 63.1, 14.2. <sup>19</sup>F NMR (470 MHz, CDCl<sub>3</sub>) δ -98.8.



**Ethyl 6-(2-ethoxy-1,1-difluoro-2-oxoethyl)phenanthridine-8-carboxylate (3m)**

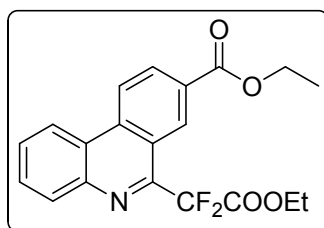

The reaction was performed following the general procedure. The residue was purified by flash column chromatograph (silica gel, petroleum ether:AcOEt = 100:1, v/v) to give the product as a white solid (72%).

$^1\text{H}$  NMR (500 MHz,  $\text{CDCl}_3$ )  $\delta$  9.26 (d,  $J$  = 1.6 Hz, 1H), 8.71 (d,  $J$  = 8.7 Hz, 1H), 8.60 (dd,  $J$  = 7.0, 2.5 Hz, 1H), 8.51 (dd,  $J$  = 8.7, 1.5 Hz, 1H), 8.17 – 8.07 (m, 1H), 7.81 (pd,  $J$  = 7.1, 3.5 Hz, 2H), 4.61 (q,  $J$  = 7.1 Hz, 2H), 4.52 (q,  $J$  = 7.1 Hz, 2H), 1.51 (td,  $J$  = 7.1, 3.8 Hz, 6H).  $^{13}\text{C}$  NMR (125 MHz,  $\text{CDCl}_3$ )  $\delta$  165.7, 163.41 (t,  $J$  = 30.0 Hz), 150.6 (t,  $J$  = 30 Hz), 142.4, 136.6, 131.1, 130.9, 130.1, 129.7, 129.3, 128.4 (t,  $J$  = 5.0 Hz), 124.2, 122.8, 122.6, 121.8 (t,  $J$  = 1.25 Hz), 115.6 (t,  $J$  = 252.5 Hz), 63.1, 61.7, 14.4, 14.1.  $^{19}\text{F}$  NMR (470 MHz,  $\text{CDCl}_3$ )  $\delta$  -98.3.

HRMS (ESI,  $m/z$ ) calcd for  $\text{C}_{20}\text{H}_{18}\text{F}_2\text{NO}_4[\text{M}+\text{H}]^+$ : 374.1204; found: 374.1199.

**Ethyl 2-(8-acetylphenanthridin-6-yl)-2,2-difluoroacetate (3n)**

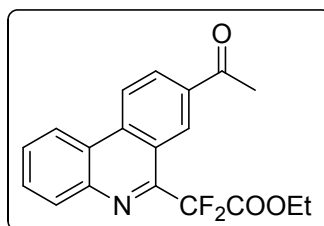

The reaction was performed following the general procedure. The residue was purified by flash column chromatograph (silica gel, petroleum ether:AcOEt = 100:1, v/v) to give the product as a white solid (76%).  $^1\text{H}$  NMR (500 MHz,  $\text{CDCl}_3$ )  $\delta$  9.05 (d,  $J$  = 1.6 Hz, 1H), 8.63 (d,  $J$  = 8.7 Hz, 1H), 8.52 (dd,  $J$  = 8.1, 1.4 Hz, 1H), 8.38

(dd,  $J$  = 8.7, 1.7 Hz, 1H), 8.13 – 8.00 (m, 1H), 7.76 (pd,  $J$  = 7.1, 1.6 Hz, 2H), 4.58 (q,  $J$  = 7.1 Hz, 2H), 2.76 (s, 3H), 1.49 (t,  $J$  = 7.1 Hz, 3H).  $^{13}\text{C}$  NMR (125 MHz,  $\text{CDCl}_3$ )  $\delta$  197.0, 163.3 (t,  $J$  = 30 Hz), 150.4 (t,  $J$  = 28.8 Hz), 142.4, 136.6, 135.7, 130.9, 130.2, 129.4, 129.4, 127.37 (t,  $J$  = 5.0 Hz), 124.0, 123.1, 122.6, 121.7 (t,  $J$  = 1.3 Hz), 115.59 (t,  $J$  = 252.5 Hz), 63.2, 26.6, 14.1.  $^{19}\text{F}$  NMR (470 MHz,  $\text{CDCl}_3$ )  $\delta$  -98.1.

HRMS (ESI,  $m/z$ ) calcd for  $\text{C}_{19}\text{H}_{16}\text{F}_2\text{NO}_3[\text{M}+\text{H}]^+$ : 344.1094; found: 344.1098.

**ethyl 2,2-difluoro-2-(8-(trifluoromethyl)phenanthridin-6-yl)acetate (3o)**

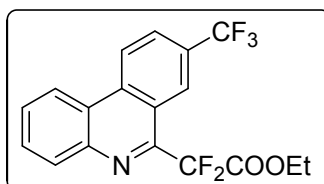

The reaction was performed following the general procedure. The residue was purified by flash column chromatograph (silica gel, petroleum ether:AcOEt = 100:1, v/v) to give the product as a white solid (71%).  $^1\text{H}$  NMR (500 MHz,  $\text{CDCl}_3$ )  $\delta$  8.83 (s, 1H), 8.79 (d,  $J$  = 8.8

Hz, 1H), 8.59 (dd,  $J$  = 6.7, 2.8 Hz, 1H), 8.18 – 8.11 (m, 1H), 8.09 (dd,  $J$  = 8.7, 1.5 Hz, 1H), 7.86 – 7.77 (m, 2H), 4.58 (q,  $J$  = 7.1 Hz, 2H), 1.49 (t,  $J$  = 7.1 Hz, 3H).  $^{13}\text{C}$  NMR (125 MHz,  $\text{CDCl}_3$ )  $\delta$  163.2 (t,  $J$  = 30 Hz), 150.1 (t,  $J$  = 28.8 Hz), 142.3, 136.0, 131.1, 130.3, 129.9, 129.6, 127.14 (dd,  $J$  = 2.5 Hz), 124.8 (t,  $J$  = 1.3 Hz), 123.9 (q,  $J$  = 3.8

Hz), 123.6, 122.7, 122.4, 121.6 (t,  $J = 2.5$  Hz), 115.5 (t,  $J = 252.5$  Hz), 63.2, 14.1.  $^{19}\text{F}$  NMR (470 MHz,  $\text{CDCl}_3$ )  $\delta$  -62.4, -98.3.

HRMS (ESI,  $m/z$ ) calcd for  $\text{C}_{18}\text{H}_{13}\text{F}_5\text{NO}_2[\text{M}+\text{H}]^+$ : 370.0866; found: 370.0862.

### ethyl 2-(7,9-dimethylphenanthridin-6-yl)-2,2-difluoroacetate (3p)

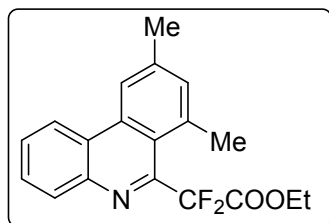

The reaction was performed following the general procedure. The residue was purified by flash column chromatograph (silica gel, petroleum ether:AcOEt = 100:1, v/v) to give the product as a white solid (78%).  $^1\text{H}$  NMR (500 MHz,  $\text{CDCl}_3$ )  $\delta$  8.51 (dd,  $J = 4.9, 3.8$  Hz, 1H), 8.31 (s, 1H), 8.07 – 7.93 (m, 1H), 7.77 – 7.62 (m, 2H), 7.40 (s, 1H), 4.54 (q,  $J = 7.1$  Hz, 2H), 2.95 (t,  $J = 2.9$  Hz, 3H), 2.56 (s, 3H), 1.46 (t,  $J = 7.1$  Hz, 3H).  $^{13}\text{C}$  NMR (125 MHz,  $\text{CDCl}_3$ )  $\delta$  164.7 (t,  $J = 32.5$  Hz), 149.16 (t,  $J = 32.5$  Hz), 140.9, 140.5, 136.2, 135.8, 134.3, 130.0, 128.7, 128.7 125.1, 122.3, 121.0, 120.4, 117.14 (t,  $J = 256.3$  Hz), 62.6, 23.9 (t,  $J = 12.5$  Hz), 21.8, 14.1.  $^{19}\text{F}$  NMR (470 MHz,  $\text{CDCl}_3$ )  $\delta$  -96.1.

HRMS (ESI,  $m/z$ ) calcd for  $\text{C}_{19}\text{H}_{18}\text{F}_2\text{NO}_2[\text{M}+\text{H}]^+$ : 330.1306; found: 330.1300.

### ethyl 2-(benzo[i]phenanthridin-5-yl)-2,2-difluoroacetate (3q)<sup>4</sup>

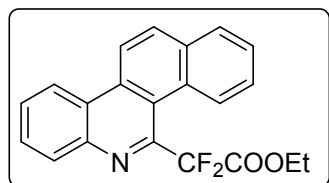

The reaction was performed following the general procedure. The residue was purified by flash column chromatograph (silica gel, petroleum ether:AcOEt = 100:1, v/v) to give the product as a white solid (63%).  $^1\text{H}$  NMR (500 MHz,  $\text{CDCl}_3$ )  $\delta$  9.11 (d,  $J = 8.5$  Hz, 1H), 8.67 – 8.54 (m, 2H), 8.20 (d,  $J = 8.9$  Hz, 1H), 8.17 – 8.10 (m, 1H), 8.00 (dd,  $J = 7.9, 1.3$  Hz, 1H), 7.83 – 7.68 (m, 4H), 4.46 (q,  $J = 7.1$  Hz, 2H), 1.35 (t,  $J = 7.1$  Hz, 3H).  $^{13}\text{C}$  NMR (125 MHz,  $\text{CDCl}_3$ )  $\delta$  164.29 (t,  $J = 32.5$  Hz), 148.20 (t,  $J = 30.0$  Hz), 142.0, 135.2, 133.1, 132.9, 129.9, 129.4, 128.8, 128.4 (t,  $J = 16.3$  Hz), 128.4, 128.2, 127.4, 127.3, 124.7, 122.7, 120.8, 119.8, 117.1 (t,  $J = 257.5$  Hz), 62.7, 14.0.  $^{19}\text{F}$  NMR (470 MHz,  $\text{CDCl}_3$ )  $\delta$  -98.4.

### ethyl 2-(9-chlorophenanthridin-6-yl)-2,2-difluoroacetate (3r)

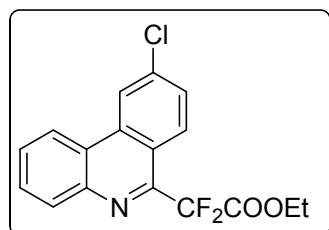

The reaction was performed following the general procedure. The residue was purified by flash column chromatograph (silica gel, petroleum ether:AcOEt = 100:1, v/v) to give the product as a white solid (74%).  $^1\text{H}$  NMR (500 MHz,  $\text{CDCl}_3$ )  $\delta$  8.63 (d,  $J = 2.0$  Hz, 1H), 8.54 – 8.44 (m, 2H), 8.19 – 8.02 (m, 1H), 7.86 – 7.75 (m, 2H), 7.71 (dd,  $J = 8.9, 2.1$  Hz, 1H), 4.57 (q,  $J = 7.1$  Hz, 2H), 1.48 (t,  $J = 7.1$  Hz, 3H).  $^{13}\text{C}$  NMR (125 MHz,  $\text{CDCl}_3$ )  $\delta$  163.4 (t,  $J = 30$  Hz), 149.8 (t,  $J = 10.0$  Hz), 142.1, 138.0,

135.3, 131.0, 129.7, 129.2, 128.6, 127.9 (t,  $J = 6.3$  Hz), 123.8, 122.3, 122.1, 120.6 (t,  $J = 1.3$  Hz), 115.6 (t,  $J = 252.5$  Hz), 63.1, 14.1.  $^{19}\text{F}$  NMR (470 MHz,  $\text{CDCl}_3$ )  $\delta$  -98.6. HRMS (ESI,  $m/z$ ) calcd for  $\text{C}_{17}\text{H}_{13}\text{ClF}_2\text{NO}_2[\text{M}+\text{H}]^+$ : 336.0603; found: 336.0595.

### Ethyl 2-([1,3]dioxolo[4,5-j]phenanthridin-6-yl)-2,2-difluoroacetate (3s)

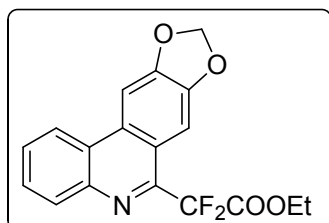

The reaction was performed following the general procedure. The residue was purified by flash column chromatograph (silica gel, petroleum ether:AcOEt = 100:1, v/v) to give the product as a white solid (84%).  $^1\text{H}$  NMR (500 MHz,  $\text{CDCl}_3$ )  $\delta$  8.35 (dd,  $J = 6.2, 3.5$  Hz, 1H), 8.06 (dd,  $J = 6.2, 3.4$  Hz, 1H), 7.94 (s, 1H), 7.85 (s, 1H), 7.68 (dd,  $J = 6.3, 3.3$  Hz, 2H), 6.19 (s, 2H), 4.56 (q,  $J = 7.1$  Hz, 2H), 1.48 (t,  $J = 7.1$  Hz, 3H).  $^{13}\text{C}$  NMR (125 MHz,  $\text{CDCl}_3$ )  $\delta$  163.69 (t,  $J = 31.3$  Hz), 151.5, 148.6 (t,  $J = 12.5$  Hz), 141.5, 132.2, 130.7, 128.5, 128.4, 125.0, 121.9, 118.9 (t,  $J = 1.3$  Hz), 116.0 (t,  $J = 252.5$  Hz), 103.5 (t,  $J = 5.0$  Hz), 102.3, 100.3, 63.0, 14.1.  $^{19}\text{F}$  NMR (470 MHz,  $\text{CDCl}_3$ )  $\delta$  -99.1.

HRMS (ESI,  $m/z$ ) calcd for  $\text{C}_{18}\text{H}_{14}\text{F}_2\text{NO}_4[\text{M}+\text{H}]^+$ : 346.0891; found: 346.0886.

### ethyl 2,2-difluoro-2-(9-methoxyphenanthridin-6-yl)acetate (3t)

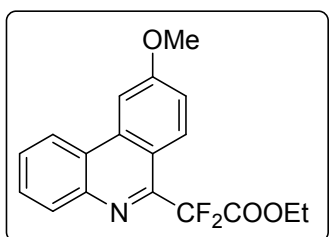

The reaction was performed following the general procedure. The residue was purified by flash column chromatograph (silica gel, petroleum ether:AcOEt = 100:1, v/v) to give the product as a white solid (85%).  $^1\text{H}$  NMR (500 MHz,  $\text{CDCl}_3$ )  $\delta$  8.51 – 8.41 (m, 2H), 8.08 (d,  $J = 7.7$  Hz, 1H), 7.93 (d,  $J = 2.0$  Hz, 1H), 7.77 – 7.65 (m, 2H), 7.32 (dd,  $J = 9.2, 2.5$  Hz, 1H), 4.56 (q,  $J = 7.1$  Hz, 2H), 4.04 (s, 3H), 1.47 (t,  $J = 7.1$  Hz, 3H).  $^{13}\text{C}$  NMR (125 MHz,  $\text{CDCl}_3$ )  $\delta$  163.75 (t,  $J = 31.3$  Hz), 161.6, 149.5 (t,  $J = 28.8$  Hz), 142.1, 136.3, 130.8, 129.1, 128.3, 128.1 (t,  $J = 5$  Hz), 124.6, 122.1, 118.2, 117.12 (t,  $J = 1.3$  Hz), 115.8 (t,  $J = 252.5$  Hz), 103.1, 63.0, 55.6, 14.1.  $^{19}\text{F}$  NMR (470 MHz,  $\text{CDCl}_3$ )  $\delta$  -98.6.

HRMS (ESI,  $m/z$ ) calcd for  $\text{C}_{18}\text{H}_{16}\text{F}_2\text{NO}_3[\text{M}+\text{H}]^+$ : 332.1098; found: 332.1098.

### ethyl 2-(2-cyanophenanthridin-6-yl)-2,2-difluoroacetate (3u)

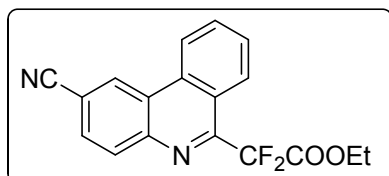

The reaction was performed following the general procedure. The residue was purified by flash column chromatograph (silica gel, petroleum ether:AcOEt = 100:1, v/v) to give the product as a white solid (71%).  $^1\text{H}$  NMR (500 MHz,  $\text{CDCl}_3$ )  $\delta$  8.90 (d,  $J = 1.5$  Hz, 1H), 8.61 (dd,  $J = 19.9, 8.3$  Hz, 2H), 8.18 (d,  $J = 8.4$  Hz, 1H), 8.05 – 7.97 (m, 1H), 7.92 (dd,  $J = 8.4, 1.7$  Hz, 1H), 7.89 – 7.81 (m, 1H), 4.57 (q,  $J = 7.1$  Hz, 2H), 1.47 (t,  $J = 7.1$  Hz, 3H).  $^{13}\text{C}$  NMR (125 MHz,  $\text{CDCl}_3$ )  $\delta$  163.1 (t,  $J = 31.3$  Hz), 153.1 (t,  $J = 28.8$  Hz), 143.2, 132.9, 132.5, 132.0, 130.6, 129.3, 127.8, 126.7 (t,  $J = 5.0$  Hz), 125.0,

122.6 (t,  $J = 2.5$  Hz), 122.5, 118.5, 115.2 (t,  $J = 253.8$  Hz), 112.4, 63.3, 14.1.  $^{19}\text{F}$  NMR (470 MHz,  $\text{CDCl}_3$ )  $\delta$  -98.9.

HRMS (ESI,  $m/z$ ) calcd for  $\text{C}_{18}\text{H}_{13}\text{F}_2\text{N}_2\text{O}_2[\text{M}+\text{H}]^+$ : 327.0945; found: 327.0942.

### ethyl 2,2-difluoro-2-(3-fluorophenanthridin-6-yl)acetate (3v)

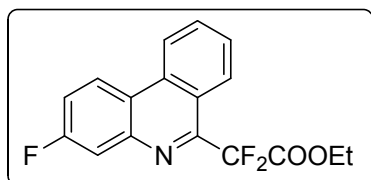

The reaction was performed following the general procedure. The residue was purified by flash column chromatograph (silica gel, petroleum ether:AcOEt = 100:1, v/v) to give the product as a white solid (86%).

$^1\text{H}$  NMR (500 MHz,  $\text{CDCl}_3$ )  $\delta$  8.50 (t,  $J = 7.2$  Hz, 2H), 8.45 (dd,  $J = 9.1, 5.7$  Hz, 1H), 7.84 (ddd,  $J = 8.3, 7.1, 1.1$  Hz, 1H), 7.77 – 7.61 (m, 2H), 7.45 (ddd,  $J = 9.0, 8.1, 2.7$  Hz, 1H), 4.58 (q,  $J = 7.1$  Hz, 2H), 1.48 (t,  $J = 7.1$  Hz, 3H).  $^{13}\text{C}$  NMR (125 MHz,  $\text{CDCl}_3$ )  $\delta$  163.6, 163.5 (t,  $J = 15.4$  Hz), 161.6, 151.4 (t,  $J = 28.8$  Hz), 142.9 (d,  $J = 11.3$  Hz), 133.6, 131.6, 127.7, 126.3 (t,  $J = 5.0$  Hz), 124.1 (d,  $J = 8.8$  Hz), 122.2, 121.8, 121.5 (d,  $J = 2.5$  Hz), 118.1 (d,  $J = 23.8$  Hz), 115.7 (t,  $J = 253.8$  Hz), 115.1 (d,  $J = 21.3$  Hz), 63.1, 14.1.  $^{19}\text{F}$  NMR (470 MHz,  $\text{CDCl}_3$ )  $\delta$  -98.7, -111.2.

HRMS (ESI,  $m/z$ ) calcd for  $\text{C}_{17}\text{H}_{13}\text{F}_3\text{NO}_2[\text{M}+\text{H}]^+$ : 320.0898; found: 320.0896.

### ethyl 2,2-difluoro-2-(3-methoxyphenanthridin-6-yl)acetate (3w)<sup>5</sup>

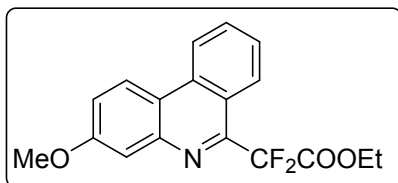

The reaction was performed following the general procedure. The residue was purified by flash column chromatograph (silica gel, petroleum ether:AcOEt = 100:1, v/v) to give the product as a white solid (78%).

$^1\text{H}$  NMR (500 MHz,  $\text{CDCl}_3$ )  $\delta$  8.56 (d,  $J = 8.4$  Hz, 1H), 8.51 (d,  $J = 8.2$  Hz, 1H), 8.45 (d,  $J = 9.1$  Hz, 1H), 7.85 (ddd,  $J = 8.3, 7.1, 1.1$  Hz, 1H), 7.67 (ddd,  $J = 8.2, 7.0, 1.1$  Hz, 1H), 7.49 (d,  $J = 2.7$  Hz, 1H), 7.37 (dd,  $J = 9.0, 2.7$  Hz, 1H), 4.56 (q,  $J = 7.1$  Hz, 2H), 3.97 (s, 3H), 1.46 (t,  $J = 7.1$  Hz, 3H).  $^{13}\text{C}$  NMR (125 MHz,  $\text{CDCl}_3$ )  $\delta$  163.8 (t,  $J = 31.3$  Hz), 160.3, 150.5 (t,  $J = 27.5$  Hz), 143.5, 134.1, 131.2, 126.8, 126.2 (t,  $J = 5.0$  Hz), 123.2, 122.0, 121.4 (t,  $J = 1.3$  Hz), 120.1, 119.0, 115.7 (t,  $J = 252.5$  Hz), 110.4, 63.0, 55.7, 14.1.  $^{19}\text{F}$  NMR (470 MHz,  $\text{CDCl}_3$ )  $\delta$  -98.8.

HRMS (ESI,  $m/z$ ) calcd for  $\text{C}_{10}\text{H}_{14}\text{N}_3\text{O}_2[\text{M}+\text{H}]^+$ : 208.1081; found: 208.1080.

### ethyl 2,2-difluoro-2-(2-(trifluoromethyl)phenanthridin-6-yl)acetate

(3x)

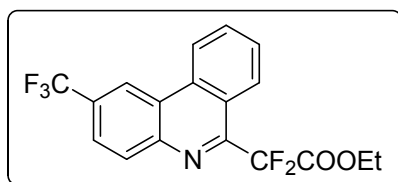

The reaction was performed following the general procedure. The residue was purified by flash column chromatograph (silica gel, petroleum ether:AcOEt = 100:1, v/v) to give the product as a white solid (79%). <sup>1</sup>H NMR (500 MHz, CDCl<sub>3</sub>) δ 8.85 (s, 1H),

8.70 (d, *J* = 8.4 Hz, 1H), 8.60 (d, *J* = 8.3 Hz, 1H), 8.23 (d, *J* = 8.5 Hz, 1H), 8.04 – 7.89 (m, 2H), 7.83 (ddd, *J* = 8.2, 7.1, 1.0 Hz, 1H), 4.57 (q, *J* = 7.1 Hz, 2H), 1.48 (t, *J* = 7.1 Hz, 3H). <sup>13</sup>C NMR (125 MHz, CDCl<sub>3</sub>) δ 163.3 (t, *J* = 30 Hz), 152.4 (t, *J* = 28.8 Hz), 143.1, 133.6, 132.0, 131.8, 130.6 (dd, *J* = 32.5 Hz), 128.8, 126.61 (t, *J* = 5.0 Hz), 125.1 (m, *J* = 2.5 Hz), 124.6, 122.9, 122.6, 120.8 (t, *J* = 3.8 Hz), 119.9 (q, *J* = 5 Hz), 115.4 (t, *J* = 253.8 Hz), 63.2, 14.1. <sup>19</sup>F NMR (470 MHz, CDCl<sub>3</sub>) δ -62.1, -98.9.

HRMS (ESI, *m/z*) calcd for C<sub>18</sub>H<sub>13</sub>F<sub>5</sub>NO<sub>2</sub>[M+H]<sup>+</sup>: 370.0866; found: 370.0859.

### ethyl 2,2-difluoro-2-(4-fluorophenanthridin-6-yl)acetate (3y)

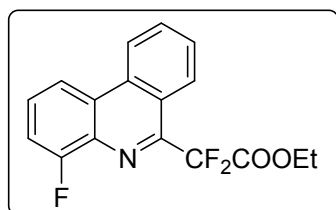

The reaction was performed following the general procedure. The residue was purified by flash column chromatograph (silica gel, petroleum ether:AcOEt = 100:1, v/v) to give the product as a white solid (86%). <sup>1</sup>H NMR (500 MHz, CDCl<sub>3</sub>) δ 8.63 – 8.54 (m, 2H), 8.29 (d, *J* = 8.4 Hz, 1H), 7.90 (ddd, *J* = 8.3, 7.1, 1.2 Hz, 1H), 7.77

(ddd, *J* = 8.3, 7.1, 1.1 Hz, 1H), 7.66 (td, *J* = 8.1, 5.2 Hz, 1H), 7.40 (ddd, *J* = 9.3, 7.9, 1.0 Hz, 1H), 4.60 (q, *J* = 7.2 Hz, 2H), 1.50 (t, *J* = 7.2 Hz, 3H). <sup>13</sup>C NMR (125 MHz, CDCl<sub>3</sub>) δ 163.5 (t, *J* = 30.0 Hz), 160.0, 157.9, 150.3 (t, *J* = 31.3 Hz), 133.3, 131.7, 131.5 (d, *J* = 10.0 Hz), 129.1 (d, *J* = 8.8 Hz), 128.5, 126.7, 126.4 (t, *J* = 5.0 Hz), 122.9, 122.4 (t, *J* = 2.5 Hz), 117.5 (d, *J* = 3.8 Hz), 115.8 (t, *J* = 252.5 Hz), 114.1 (d, *J* = 18.8 Hz), 63.3, 14.0. <sup>19</sup>F NMR (470 MHz, CDCl<sub>3</sub>) δ -98.7, -122.3.

HRMS (ESI, *m/z*) calcd for C<sub>17</sub>H<sub>13</sub>F<sub>3</sub>NO<sub>2</sub>[M+H]<sup>+</sup>: 320.0898; found: 320.0891.

### ethyl 2,2-difluoro-2-(2-(trifluoromethoxy)phenanthridin-6-yl)acetate

(3z)

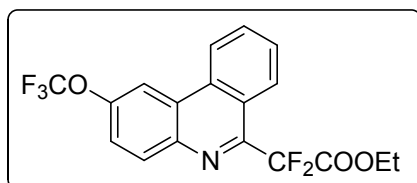

The reaction was performed following the general procedure. The residue was purified by flash column chromatograph (silica gel, petroleum ether:AcOEt = 100:1, v/v) to give the product as a white solid (76%). <sup>1</sup>H NMR (500 MHz, CDCl<sub>3</sub>) δ

8.68 – 8.55 (m, 2H), 8.39 (d, *J* = 1.8 Hz, 1H), 8.18 (d, *J* = 8.9 Hz, 1H), 8.05 – 7.91 (m, 1H), 7.89 – 7.79 (m, 1H), 7.63 (dd, *J* = 8.9, 1.5 Hz, 1H), 4.59 (q, *J* = 7.1 Hz, 2H), 1.50 (t, *J* = 7.1 Hz, 3H). <sup>13</sup>C NMR (125 MHz, CDCl<sub>3</sub>) δ 163.4 (t, *J* = 30.0 Hz), 150.7 (t, *J* = 28.8 Hz), 149.1, 140.0, 133.3, 132.9, 131.6, 128.8, 126.49 (t, *J* = 5.0 Hz), 126.0, 122.6, 122.4 (t, *J* = 1.3 Hz), 122.3, 121.6, 117.6 (t, *J* = 252.5 Hz), 113.6, 63.1, 14.1. <sup>19</sup>F NMR (470 MHz, CDCl<sub>3</sub>) δ -57.6, -98.9.

HRMS (ESI, *m/z*) calcd for C<sub>18</sub>H<sub>13</sub>F<sub>5</sub>NO<sub>3</sub>[M+H]<sup>+</sup>: 386.0816; found: 386.0812.

### ethyl 2-(benzo[c][1,5]naphthyridin-6-yl)-2,2-difluoroacetate (3aa)

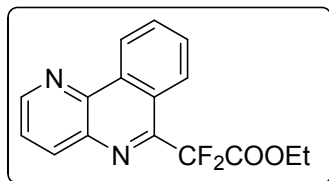

The reaction was performed following the general procedure. The residue was purified by flash column chromatograph (silica gel, petroleum ether:AcOEt = 100:1, v/v) to give the product as a white solid (77%). <sup>1</sup>H NMR (500 MHz, CDCl<sub>3</sub>) δ 9.36 – 9.27 (m, 1H), 9.07 (dd, *J* = 4.3, 1.7 Hz, 1H), 8.58 (d, *J* = 8.3 Hz, 1H), 8.41 (dd, *J* = 8.3, 1.7 Hz, 1H), 8.01 (ddd, *J* = 8.2, 7.1, 1.0 Hz, 1H), 7.88 (ddd, *J* = 8.4, 7.1, 1.3 Hz, 1H), 7.70 (dd, *J* = 8.3, 4.3 Hz, 1H), 4.58 (q, *J* = 7.1 Hz, 2H), 1.48 (t, *J* = 7.1 Hz, 3H). <sup>13</sup>C NMR (125 MHz, CDCl<sub>3</sub>) δ 163.4 (t, *J* = 30.0 Hz), 151.2, 151.1 (t, *J* = 28.8 Hz), 141.5, 137.8, 136.6, 134.8, 131.8, 129.6, 125.6 (t, *J* = 5.0 Hz), 124.35 (t, *J* = 1.3 Hz), 124.2, 124.1, 115.3 (t, *J* = 252.5 Hz), 63.2, 14.1. <sup>19</sup>F NMR (470 MHz, CDCl<sub>3</sub>) δ -99.0. HRMS (ESI, *m/z*) calcd for C<sub>16</sub>H<sub>13</sub>F<sub>2</sub>N<sub>2</sub>O<sub>2</sub>[M+H]<sup>+</sup>: 303.0945; found: 303.0942.

### Diethyl 2,2'-(pyrrolo[1,2-*a*]quinoxaline-1,4-diyl)bis(2,2-difluoroacetate) (3ab)

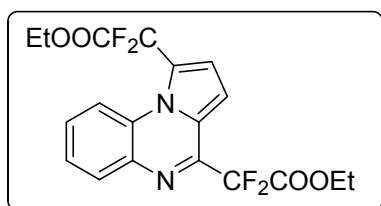

The reaction was performed following the general procedure. The residue was purified by flash column chromatograph (silica gel, petroleum ether:AcOEt = 100:1, v/v) to give the product as a white solid (73%). <sup>1</sup>H NMR (500 MHz, CDCl<sub>3</sub>) δ 8.19 (d, *J* = 8.6 Hz, 1H), 8.03 (dd, *J* = 8.0, 1.5 Hz, 1H), 7.64 (ddd, *J* = 8.7, 7.3, 1.6 Hz, 1H), 7.58 – 7.51 (m, 1H), 7.31 – 7.22 (m, 2H), 4.48 (q, *J* = 7.1 Hz, 2H), 4.37 (q, *J* = 7.1 Hz, 2H), 1.40 (t, *J* = 7.1 Hz, 3H), 1.26 (t, *J* = 7.1 Hz, 3H). <sup>13</sup>C NMR (125 MHz, CDCl<sub>3</sub>) δ 162.9 (t, *J* = 33.8 Hz), 162.6 (t, *J* = 31.3 Hz), 135.1, 131.5, 130.1, 128.0, 126.4, 125.7, 122.4 (t, *J* = 31.3 Hz), 118.7 (t, *J* = 6.3 Hz), 116.8 (t, *J* = 7.5 Hz), 115.1, 113.1, 111.1 (t, *J* = 246.3 Hz), 107.34 (t, *J* = 3.8 Hz), 64.0, 63.4, 14.0, 13.8. <sup>19</sup>F NMR (470 MHz, CDCl<sub>3</sub>) δ -92.7, -105.1. HRMS (ESI, *m/z*) calcd for C<sub>19</sub>H<sub>17</sub>F<sub>4</sub>N<sub>2</sub>O<sub>4</sub>[M+H]<sup>+</sup>: 413.1124; found: 413.1117.

### ethyl 2-(benzo[*d*]thiazol-2-yl)-2,2-difluoroacetate (5a)

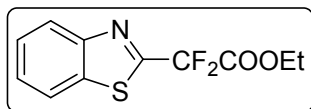

The reaction was performed following the general procedure. The residue was purified by flash column chromatograph (silica gel, petroleum ether:AcOEt = 100:1, v/v) to give the product as a white solid (78%). <sup>1</sup>H NMR (500 MHz, CDCl<sub>3</sub>) δ 8.16 (d, *J* = 7.8 Hz, 1H), 8.02 – 7.96 (m, 1H), 7.58 (ddd, *J* = 8.3, 7.3, 1.3 Hz, 1H), 7.55 – 7.50 (m, 1H), 4.44 (q, *J* = 7.1 Hz, 2H), 1.37 (t, *J* = 7.1 Hz, 3H). <sup>13</sup>C NMR (125 MHz, CDCl<sub>3</sub>) δ 161.7 (t, *J* = 32.5 Hz), 160.3 (t, *J* = 32.5 Hz), 152.5, 135.1, 127.0, 127.0, 124.8, 122.0, 110.3 (t, *J* = 251.3 Hz), 64.0, 13.9. <sup>19</sup>F NMR (470 MHz, CDCl<sub>3</sub>) δ -98.4. HRMS (ESI, *m/z*) calcd for C<sub>11</sub>H<sub>10</sub>F<sub>2</sub>NO<sub>2</sub>S[M+H]<sup>+</sup>: 258.0400; found: 258.0396.

### ethyl 2,2-difluoro-2-(5-methoxybenzo[d]thiazol-2-yl)acetate (5b)

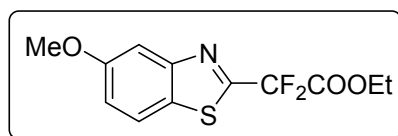

The reaction was performed following the general procedure. The residue was purified by flash column chromatograph (silica gel, petroleum ether:AcOEt = 100:1, v/v) to give the product as a white solid (77%). <sup>1</sup>H NMR (500 MHz, CDCl<sub>3</sub>) δ 8.01 (d, *J* = 9.0 Hz, 1H), 7.37 (d, *J* = 2.5 Hz, 1H), 7.16 (dd, *J* = 9.1, 2.5 Hz, 1H), 4.44 (q, *J* = 7.1 Hz, 2H), 3.90 (s, 3H), 1.37 (t, *J* = 7.1 Hz, 3H). <sup>13</sup>C NMR (125 MHz, CDCl<sub>3</sub>) δ 161.9 (t, *J* = 31.3 Hz), 159.0, 157.3 (t, *J* = 32.5 Hz), 147.0, 136.8, 125.3, 117.0, 110.3 (t, *J* = 25.3 Hz), 103.6, 63.9, 55.9, 13.9. <sup>19</sup>F NMR (470 MHz, CDCl<sub>3</sub>) δ -98.0. HRMS (ESI, *m/z*) calcd for C<sub>12</sub>H<sub>12</sub>F<sub>2</sub>NO<sub>3</sub>S[M+H]<sup>+</sup>: 288.0506; found: 288.0502.

### ethyl 2-(5-ethoxybenzo[d]thiazol-2-yl)-2,2-difluoroacetate (5c)

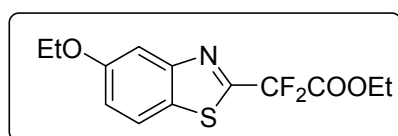

The reaction was performed following the general procedure. The residue was purified by flash column chromatograph (silica gel, petroleum ether:AcOEt = 100:1, v/v) to give the product as a white solid (82%). <sup>1</sup>H NMR (500 MHz, CDCl<sub>3</sub>) δ 8.00 (d, *J* = 9.0 Hz, 1H), 7.36 (d, *J* = 2.5 Hz, 1H), 7.15 (dd, *J* = 9.0, 2.5 Hz, 1H), 4.44 (q, *J* = 7.1 Hz, 2H), 4.11 (q, *J* = 7.0 Hz, 2H), 1.47 (t, *J* = 7.0 Hz, 3H), 1.37 (t, *J* = 7.1 Hz, 3H). <sup>13</sup>C NMR (125 MHz, CDCl<sub>3</sub>) δ 161.9 (t, *J* = 32.5 Hz), 158.4, 157.1 (t, *J* = 32.5 Hz), 146.9, 136.8, 125.3, 117.4, 108.3 (t, *J* = 251.3 Hz), 64.2, 63.9, 14.7, 13.9. <sup>19</sup>F NMR (470 MHz, CDCl<sub>3</sub>) δ -98.0. HRMS (ESI, *m/z*) calcd for C<sub>13</sub>H<sub>14</sub>F<sub>2</sub>NO<sub>3</sub>S[M+H]<sup>+</sup>: 302.0662; found: 302.0658.

### ethyl 2,2-difluoro-2-(5-(trifluoromethoxy)benzo[d]thiazol-2-yl)acetate

#### (5d)

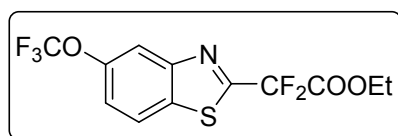

The reaction was performed following the general procedure. The residue was purified by flash column chromatograph (silica gel, petroleum ether:AcOEt = 100:1, v/v) to give the product as a white solid (85%). <sup>1</sup>H NMR (500 MHz, CDCl<sub>3</sub>) δ 8.16 (d, *J* = 9.0 Hz, 1H), 7.85 (d, *J* = 1.2 Hz, 1H), 7.45 (dd, *J* = 9.0, 1.6 Hz, 1H), 4.44 (q, *J* = 7.1 Hz, 2H), 1.38 (t, *J* = 7.1 Hz, 3H). <sup>13</sup>C NMR (125 MHz, CDCl<sub>3</sub>) δ 161.5 (t, *J* = 32.5 Hz), 161.4 (t, *J* = 31.3 Hz), 150.8, 147.8, 136.1, 125.8, 121.1, 114.3, 109.9 (t, *J* = 252.5 Hz), 64.1, 13.9. <sup>19</sup>F NMR (470 MHz, CDCl<sub>3</sub>) δ -58.0, -98.5. HRMS (ESI, *m/z*) calcd for C<sub>12</sub>H<sub>9</sub>F<sub>5</sub>NO<sub>3</sub>S[M+H]<sup>+</sup>: 342.0223; found: 342.0220.

### ethyl 2,2-difluoro-2-(5-methylbenzo[d]thiazol-2-yl)acetate (5e)

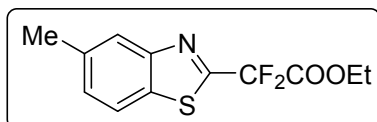

The reaction was performed following the general procedure. The residue was purified by flash column chromatograph (silica gel, petroleum ether:AcOEt = 100:1, v/v) to give the product as a white solid (79%).

$^1\text{H}$  NMR (500 MHz,  $\text{CDCl}_3$ )  $\delta$  8.02 (d,  $J$  = 8.4 Hz, 1H), 7.75 (s, 1H), 7.37 (dd,  $J$  = 8.4, 1.5 Hz, 1H), 4.44 (q,  $J$  = 7.1 Hz, 2H), 2.52 (s, 3H), 1.37 (t,  $J$  = 7.1 Hz, 3H).  $^{13}\text{C}$  NMR (125 MHz,  $\text{CDCl}_3$ )  $\delta$  161.8 (t,  $J$  = 31.3 Hz), 159.1 (t,  $J$  = 32.5 Hz), 150.6, 137.5, 135.4, 128.7, 124.2, 121.5, 110.3 (t,  $J$  = 251.3 Hz), 63.9, 21.7, 13.9.  $^{19}\text{F}$  NMR (470 MHz,  $\text{CDCl}_3$ )  $\delta$  -98.3.

HRMS (ESI,  $m/z$ ) calcd for  $\text{C}_{12}\text{H}_{12}\text{F}_2\text{NO}_2\text{S}[\text{M}+\text{H}]^+$ : 272.0557; found: 272.0556.

### ethyl 2-(5-bromobenzo[d]thiazol-2-yl)-2,2-difluoroacetate (5f)

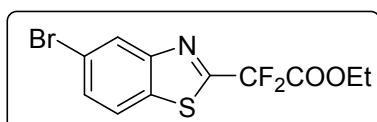

The reaction was performed following the general procedure. The residue was purified by flash column chromatograph (silica gel, petroleum ether:AcOEt = 100:1, v/v) to give the product as a white solid (67%).

$^1\text{H}$  NMR (500 MHz,  $\text{CDCl}_3$ )  $\delta$  8.13 (d,  $J$  = 1.8 Hz, 1H), 8.00 (d,  $J$  = 8.8 Hz, 1H), 7.68 (dd,  $J$  = 8.8, 1.9 Hz, 1H), 4.44 (q,  $J$  = 7.1 Hz, 2H), 1.37 (t,  $J$  = 7.1 Hz, 3H).  $^{13}\text{C}$  NMR (125 MHz,  $\text{CDCl}_3$ )  $\delta$  161.5 (t,  $J$  = 32.5 Hz), 160.8 (t,  $J$  = 32.5 Hz), 151.3, 136.7, 130.7, 125.8, 124.7, 121.0, 110.0 (t,  $J$  = 252.5 Hz), 64.1, 13.9.  $^{19}\text{F}$  NMR (470 MHz,  $\text{CDCl}_3$ )  $\delta$  -98.43 (s).

HRMS (ESI,  $m/z$ ) calcd for  $\text{C}_{11}\text{H}_{10}\text{BrF}_2\text{NO}_2\text{S}[\text{M}+\text{H}]^+$ : 335.9505; found: 335.9507.

### ethyl 2-(6-chlorobenzo[d]thiazol-2-yl)-2,2-difluoroacetate (5g)

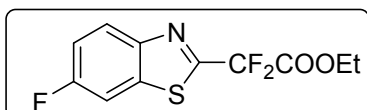

The reaction was performed following the general procedure. The residue was purified by flash column chromatograph (silica gel, petroleum ether:AcOEt = 100:1, v/v) to give the product as a yellow oil (75%).

$^1\text{H}$  NMR (500 MHz,  $\text{CDCl}_3$ )  $\delta$  7.92 (dd,  $J$  = 8.9, 5.0 Hz, 1H), 7.83 (dd,  $J$  = 9.1, 2.5 Hz, 1H), 7.31 (td,  $J$  = 8.8, 2.5 Hz, 1H), 4.44 (q,  $J$  = 7.1 Hz, 2H), 1.38 (t,  $J$  = 7.1 Hz, 3H).  $^{13}\text{C}$  NMR (125 MHz,  $\text{CDCl}_3$ )  $\delta$  163.0, 162.7 (t,  $J$  = 32.5 Hz), 161.5 (t,  $J$  = 31.3 Hz), 161.0, 153.4 (d,  $J$  = 12.2 Hz), 130.6, 122.9 (d,  $J$  = 9.9 Hz), 116.3 (d,  $J$  = 25 Hz), 110.82 (d,  $J$  = 23.8 Hz), 110.00 (t,  $J$  = 251.3 Hz), 64.1, 13.9.  $^{19}\text{F}$  NMR (470 MHz,  $\text{CDCl}_3$ )  $\delta$  -98.6, -114.0.

HRMS (ESI,  $m/z$ ) calcd for  $\text{C}_{11}\text{H}_9\text{F}_3\text{NO}_2\text{S}[\text{M}+\text{H}]^+$ : 276.0301; found: 276.0303.

### ethyl 2-(4,6-difluorobenzo[d]thiazol-2-yl)-2,2-difluoroacetate (5h)



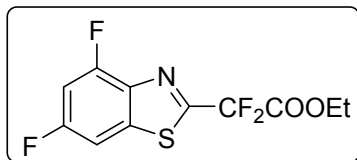

The reaction was performed following the general procedure. The residue was purified by flash column chromatograph (silica gel, petroleum ether:AcOEt = 100:1, v/v) to give the product as a yellow oil (75%).

$^1\text{H}$  NMR (500 MHz,  $\text{CDCl}_3$ )  $\delta$  7.48 (ddd,  $J = 7.5, 2.3, 1.3$  Hz, 1H), 7.09 (ddd,  $J = 9.9, 9.2, 2.3$  Hz, 1H), 4.45 (q,  $J = 7.1$  Hz, 2H), 1.38 (t,  $J = 7.1$  Hz, 3H).  $^{13}\text{C}$  NMR (125 MHz,  $\text{CDCl}_3$ )  $\delta$  160.63 – 160.16 (m), 138.1, 109.8 (t,  $J = 250$  Hz), 104.14 (d,  $J = 5.0$  Hz), 104.03 (dd,  $J = 26.8, 5.0$  Hz), 104.28 – 103.46 (m), 64.2, 13.9.  $^{19}\text{F}$  NMR (470 MHz,  $\text{CDCl}_3$ )  $\delta$  -97.9, -108.45 (d,  $J = 7.0$  Hz), -114.71 (d,  $J = 7.1$  Hz).

HRMS (ESI,  $m/z$ ) calcd for  $\text{C}_{11}\text{H}_8\text{F}_4\text{NO}_2\text{S}[\text{M}+\text{H}]^+$ : 294.0212; found: 294.0208.

### (2'-isocyano-[1,1'-biphenyl]-4-yl)(methyl)sulfane (8)

$^1\text{H}$  NMR (500 MHz,  $\text{CDCl}_3$ )  $\delta$  7.51 – 7.32 (m, 8H), 2.54 (s, 3H).  $^{13}\text{C}$  NMR (125 MHz,  $\text{CDCl}_3$ )  $\delta$  166.5, 139.3, 138.2, 133.5, 130.4, 129.6, 129.3, 128.0, 126.2, 15.5.

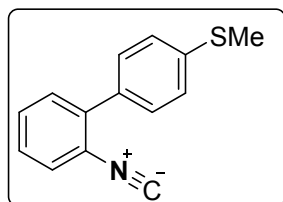

### (2'-isocyano-[1,1'-biphenyl]-4-yl)(methyl)sulfane

(11)

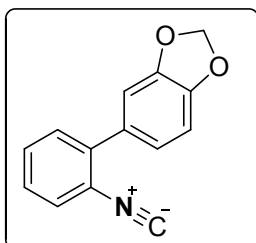

$^1\text{H}$  NMR (500 MHz,  $\text{CDCl}_3$ )  $\delta$  7.49 – 7.31 (m, 4H), 7.01 – 6.95 (m, 2H), 6.92 (t,  $J = 5.0$  Hz, 1H), 6.03 (s, 2H).  $^{13}\text{C}$  NMR (125 MHz,  $\text{CDCl}_3$ )  $\delta$  166.5, 147.5, 138.5, 130.8, 130.5, 129.5, 127.9, 122.9, 109.5, 108.5, 101.4.

### 1-(difluoromethyl)-1H-benzo[d]imidazole (10)

$^1\text{H}$  NMR (500 MHz,  $\text{CDCl}_3$ )  $\delta$  8.12 (s, 1H), 7.93 – 7.76 (m, 1H), 7.61 (dd,  $J = 5.4, 3.6$  Hz, 1H), 7.37 (ddd,  $J = 85.8, 55.8, 43.2$  Hz, 3H).  $^{13}\text{C}$  NMR (125 MHz,  $\text{CDCl}_3$ )  $\delta$  143.9, 139.1, 130.6, 124.8, 124.2, 121.0, 111.1, 109.0 (t,  $J = 248.8$  Hz).  $^{19}\text{F}$  NMR (470 MHz,  $\text{CDCl}_3$ )  $\delta$  -93.7.

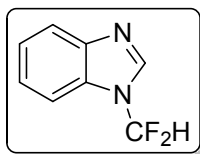

## 13. References:

- 1 I. T. Alt, B. Plietker, *Angew. Chem. Int. Ed.* 2016, **55**, 1519-1522.
- 2 J. Rong, L. Deng, P. Tan, C. Ni, Y. Gu, Hu, *J. Angew. Chem. Int. Ed.* 2016, **55**, 2743-2747.
- 3 J.-W. Gu, X. Zhang, *Org. Lett.* **2015**, *17*, 5384-5387.
- 4 X. Sun, S. Yu, *Org. Lett.* **2014**, *16*, 2938-2941.

#### 14. NMR spectroscopic data

ethyl 2,2-difluoro-2-(phenanthridin-6-yl)acetate (3a)

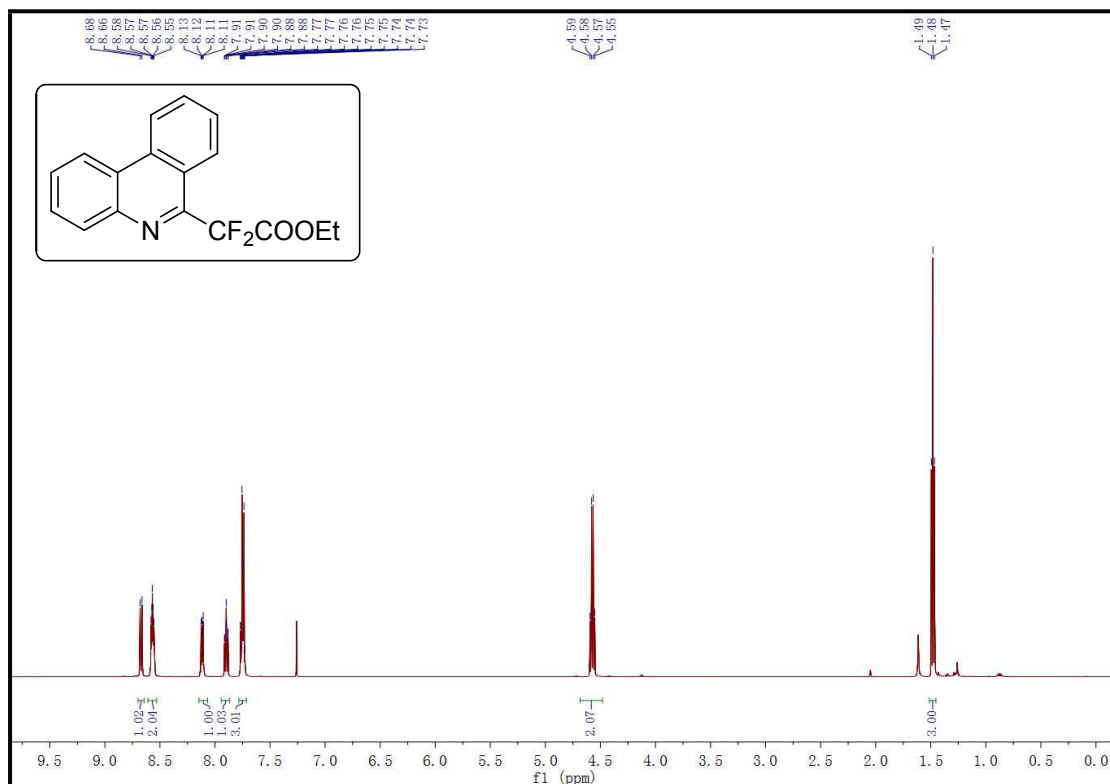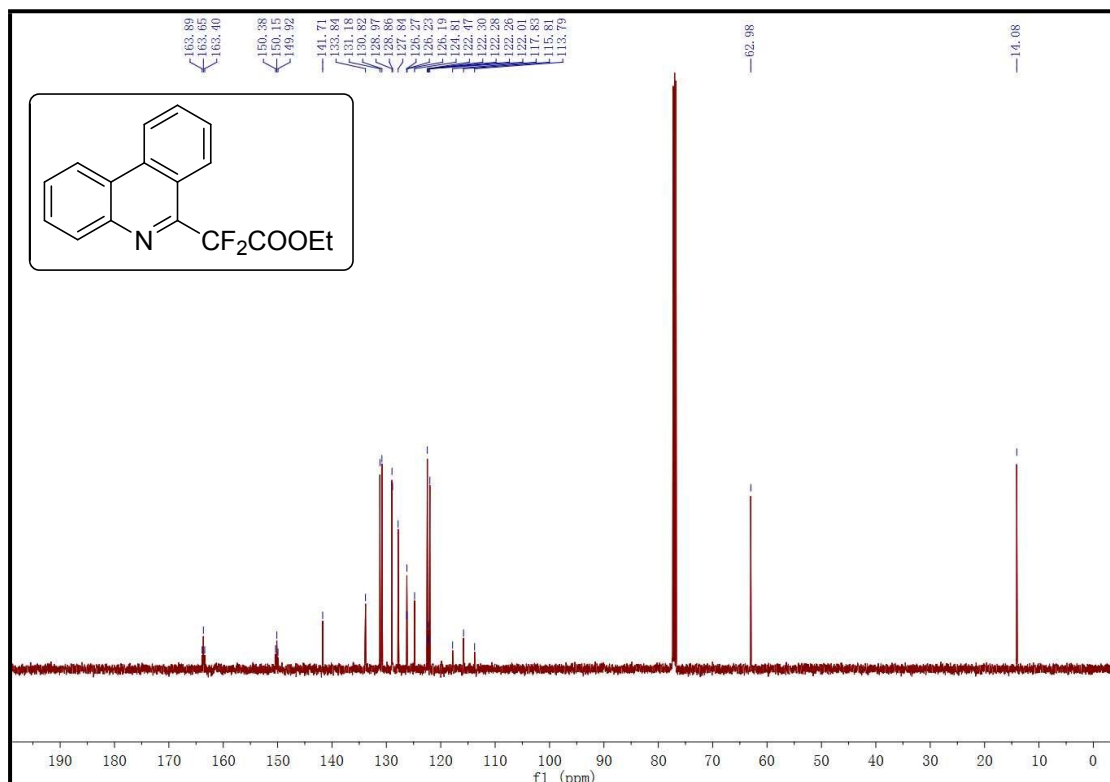

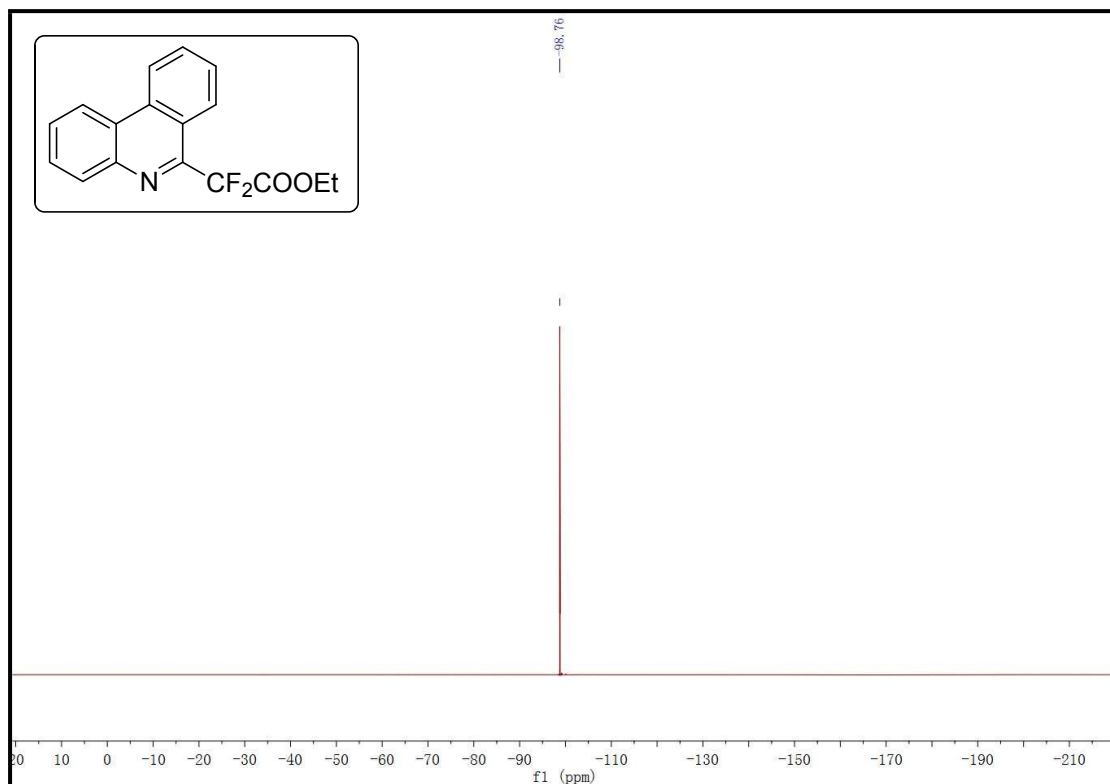

**ethyl 2,2-difluoro-2-(8-methylphenanthridin-6-yl)acetate (3b)**

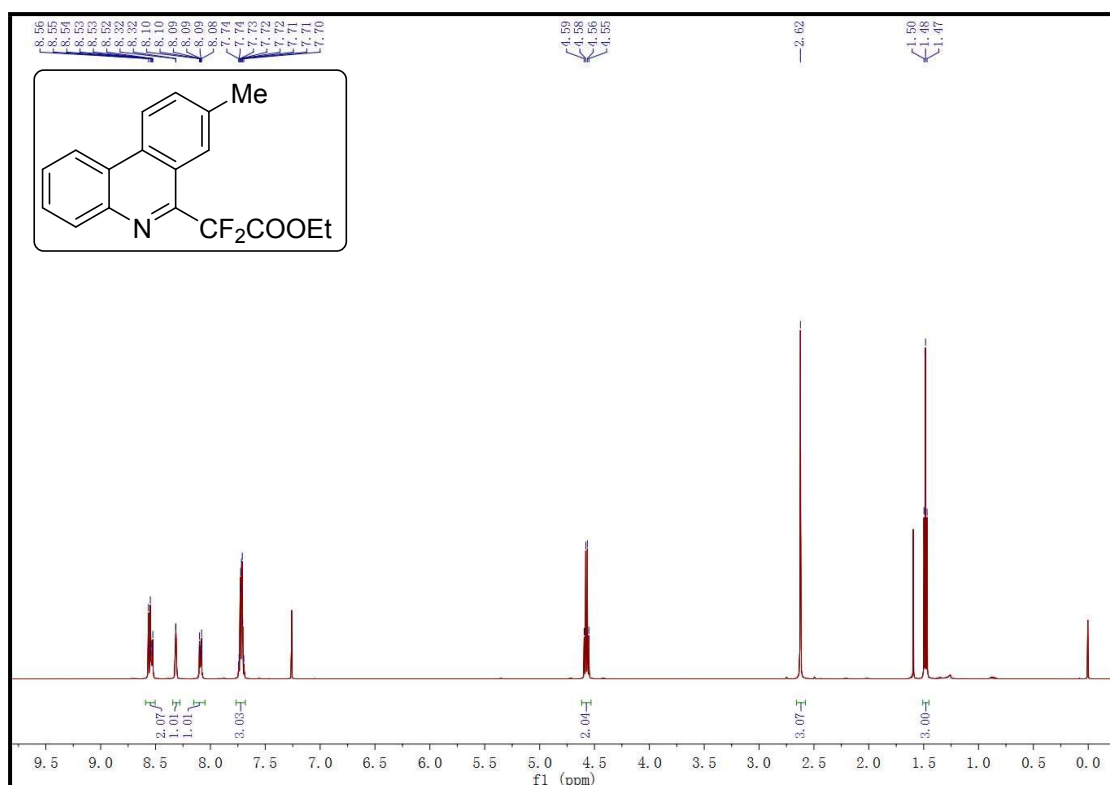

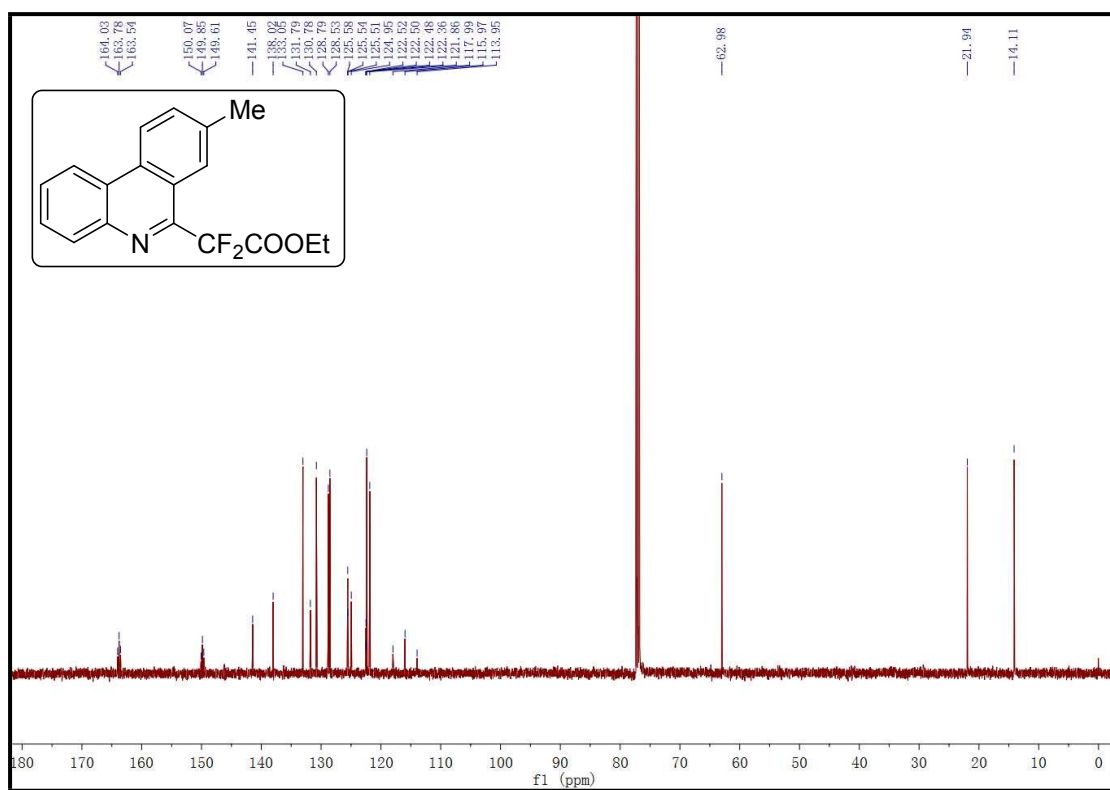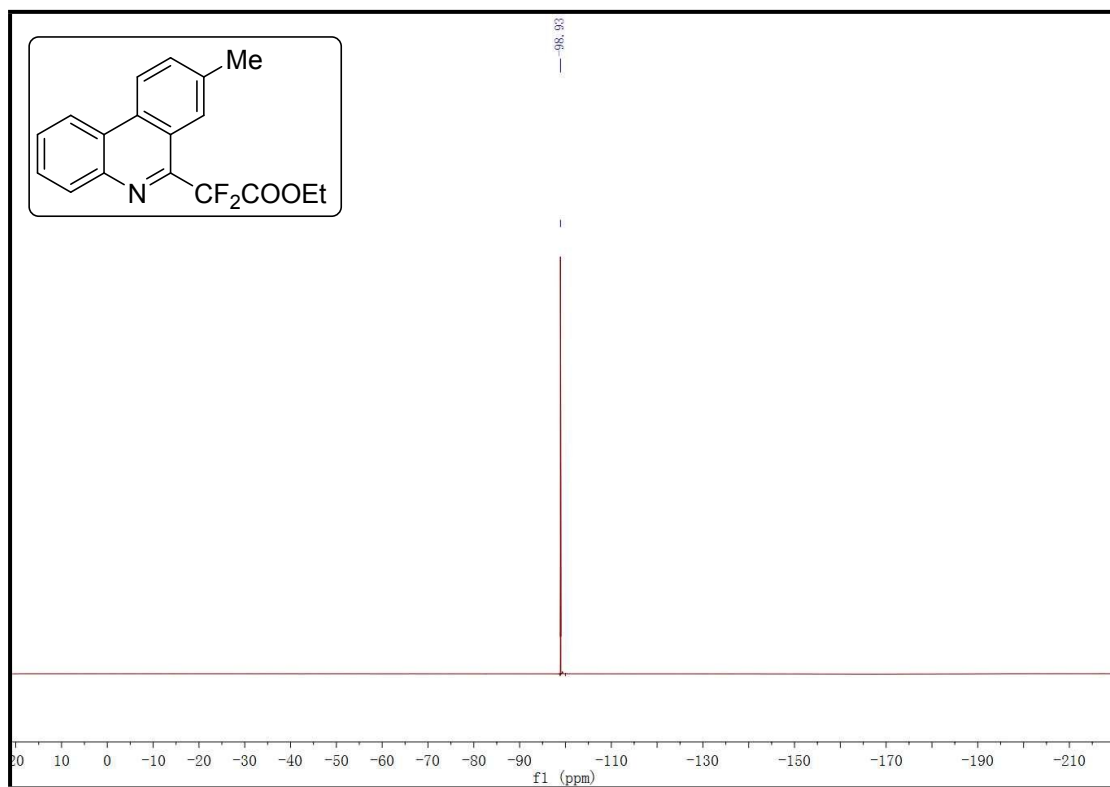

**ethyl 2-(8-ethylphenanthridin-6-yl)-2,2-difluoroacetate (3c)**

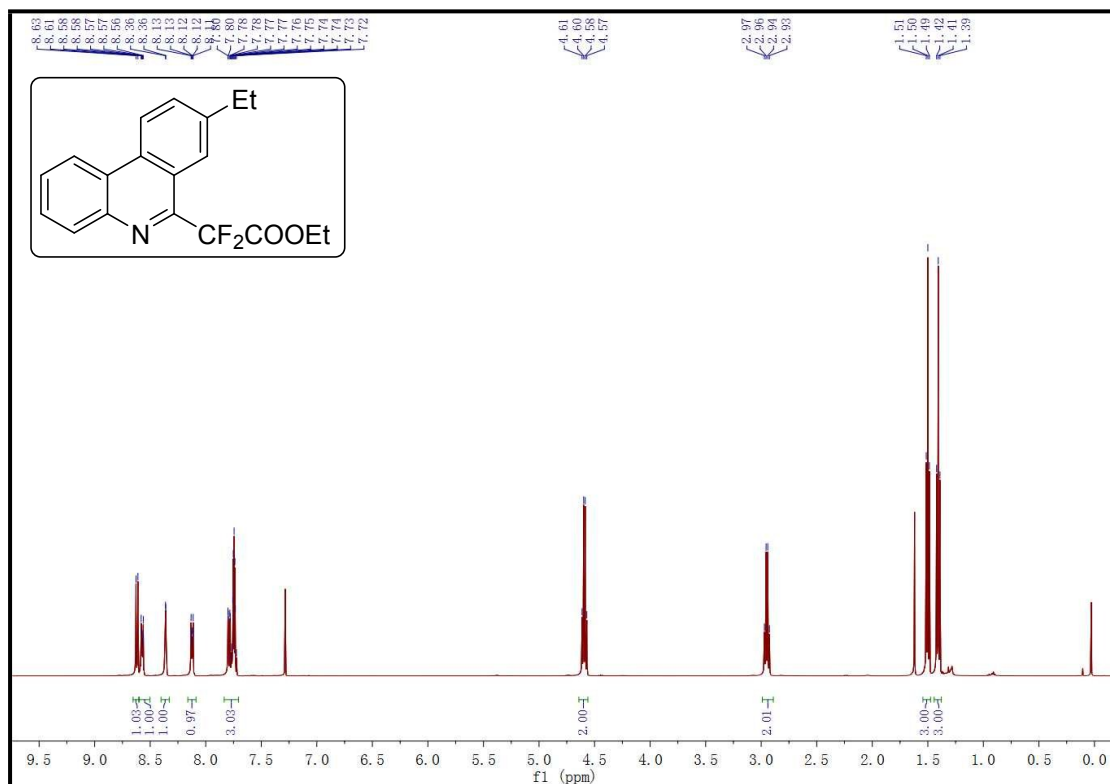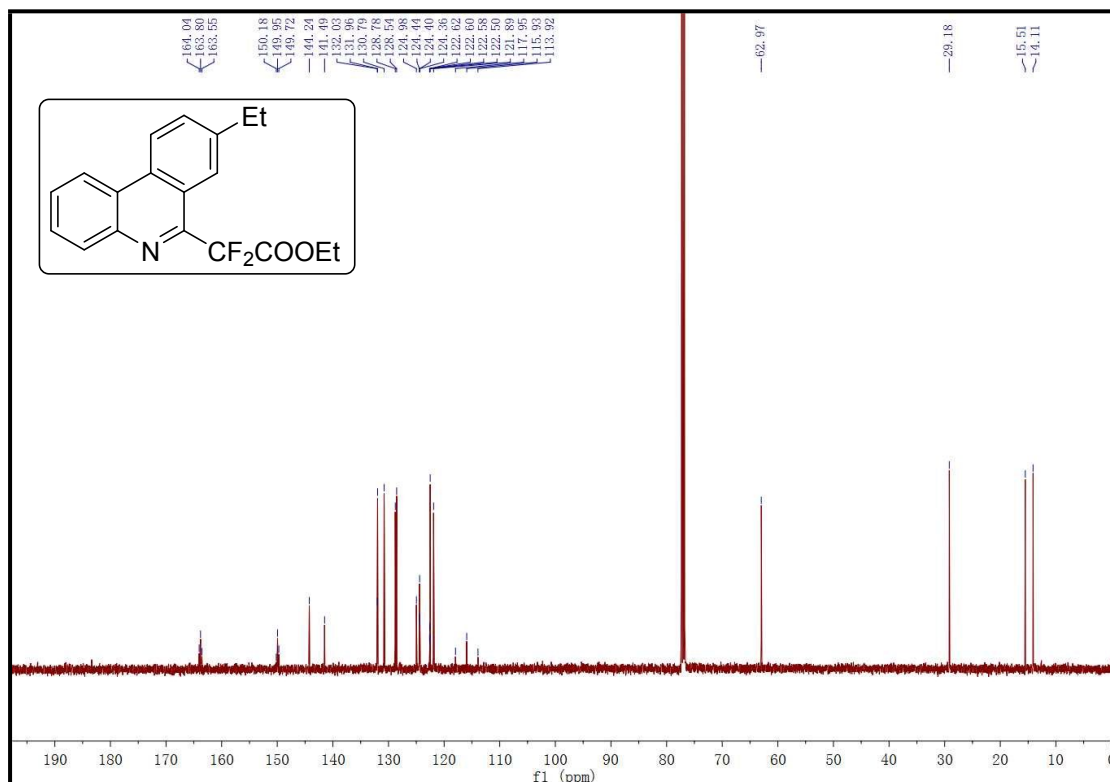

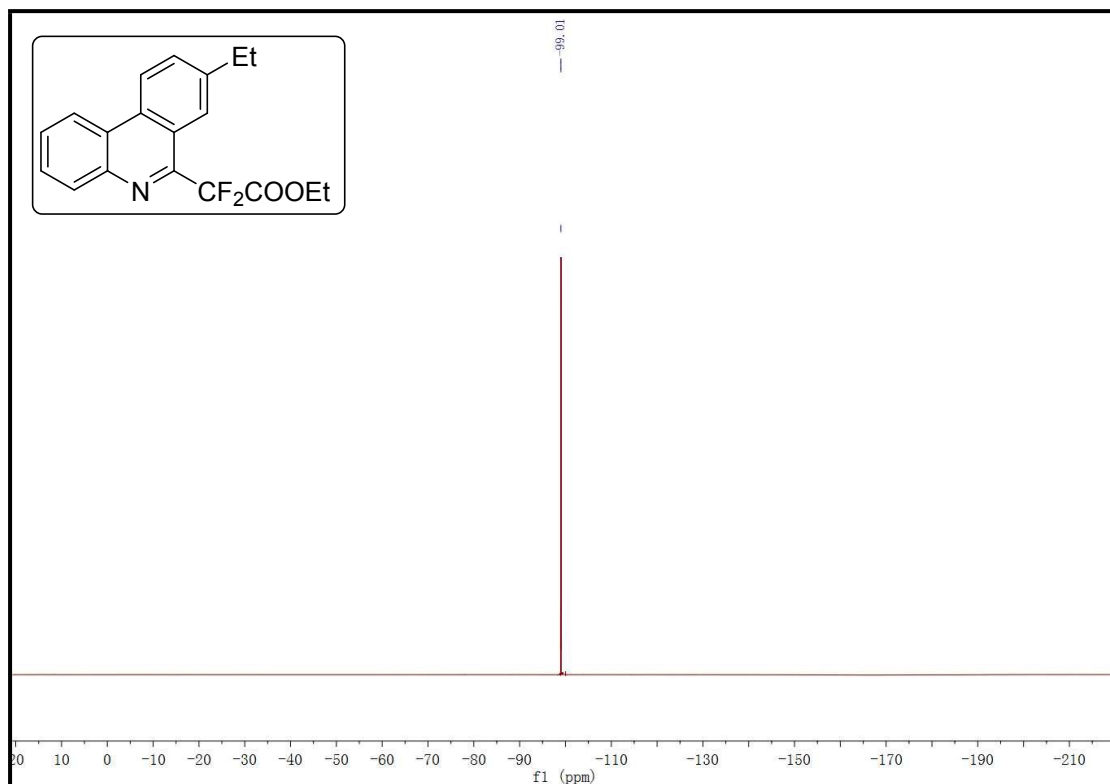

**ethyl 2,2-difluoro-2-(8-isopropylphenanthridin-6-yl)acetate (3d)**

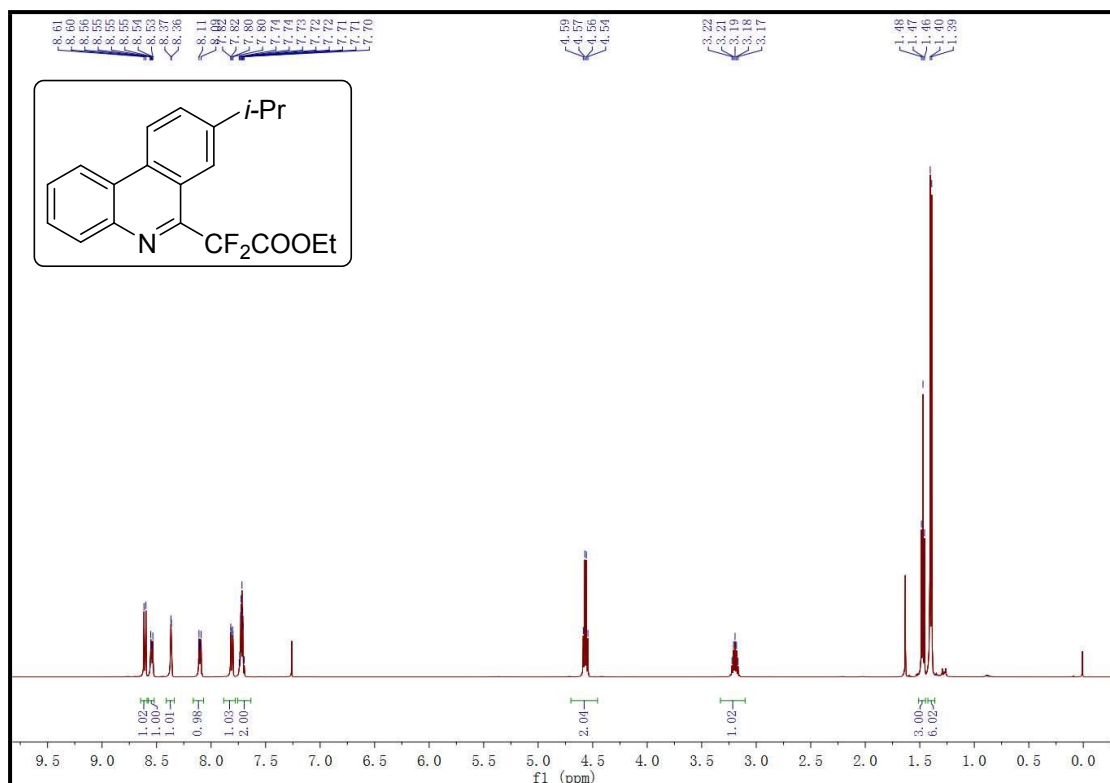

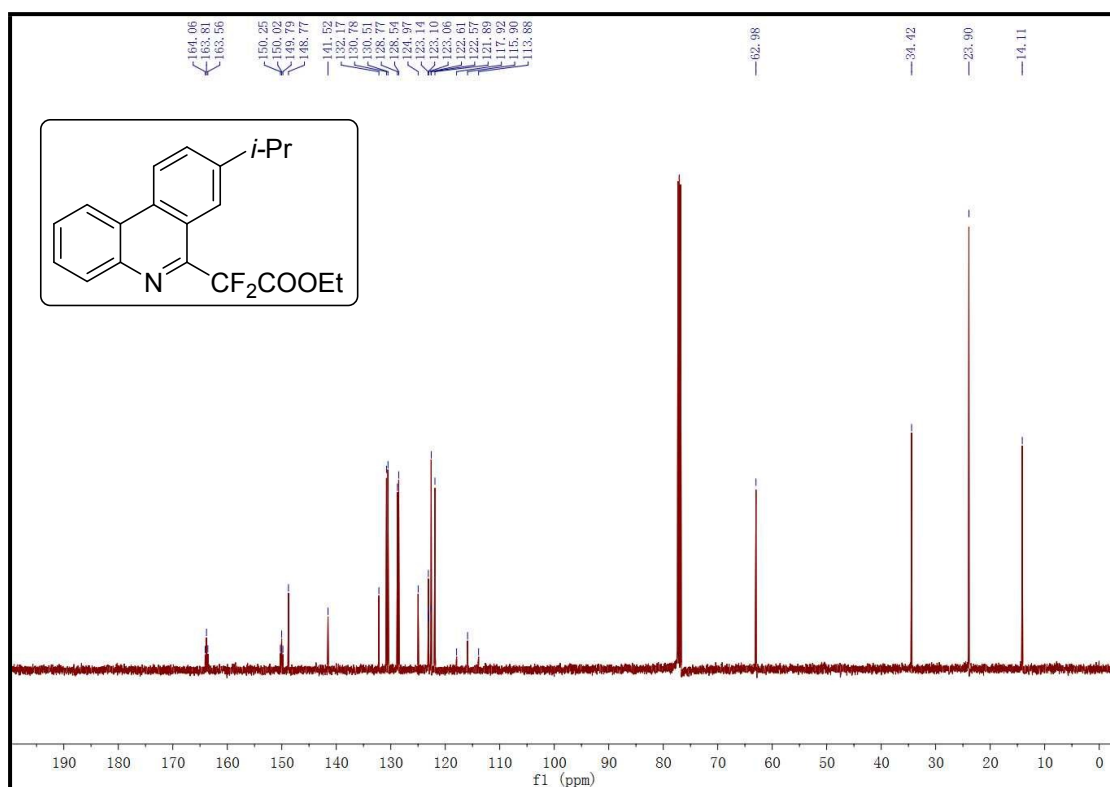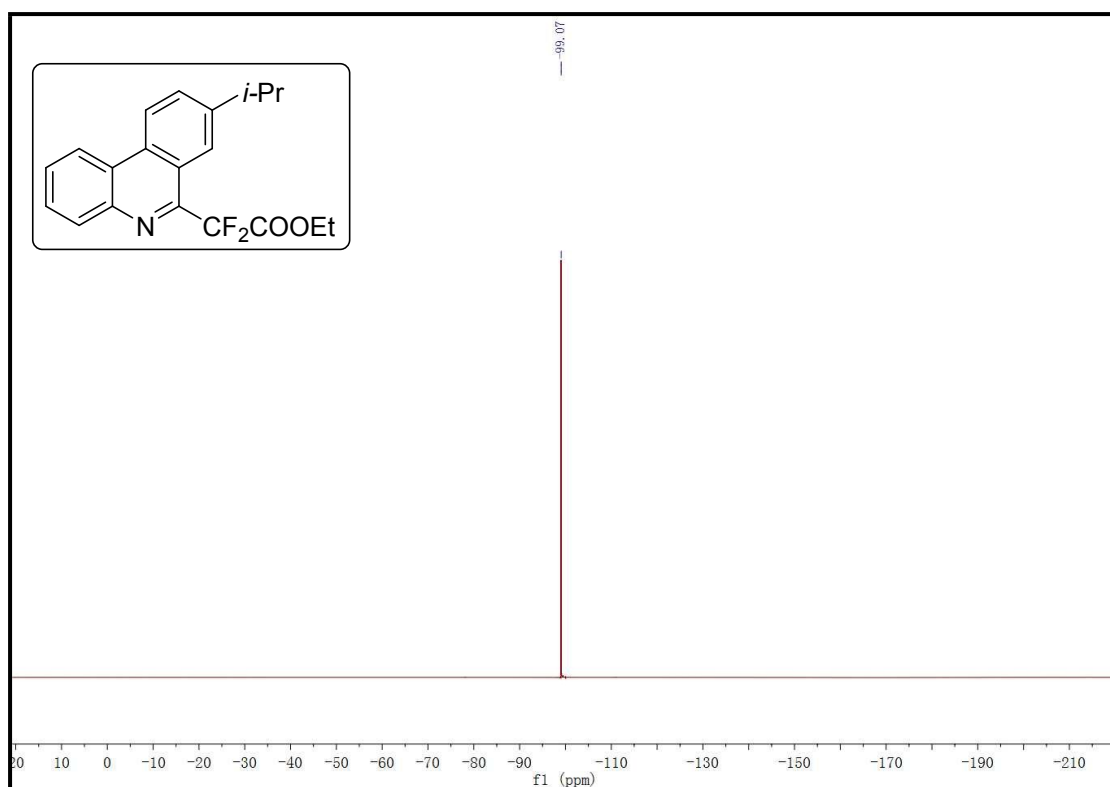



**ethyl 2,2-difluoro-2-(8-propylphenanthridin-6-yl)acetate (3e)**

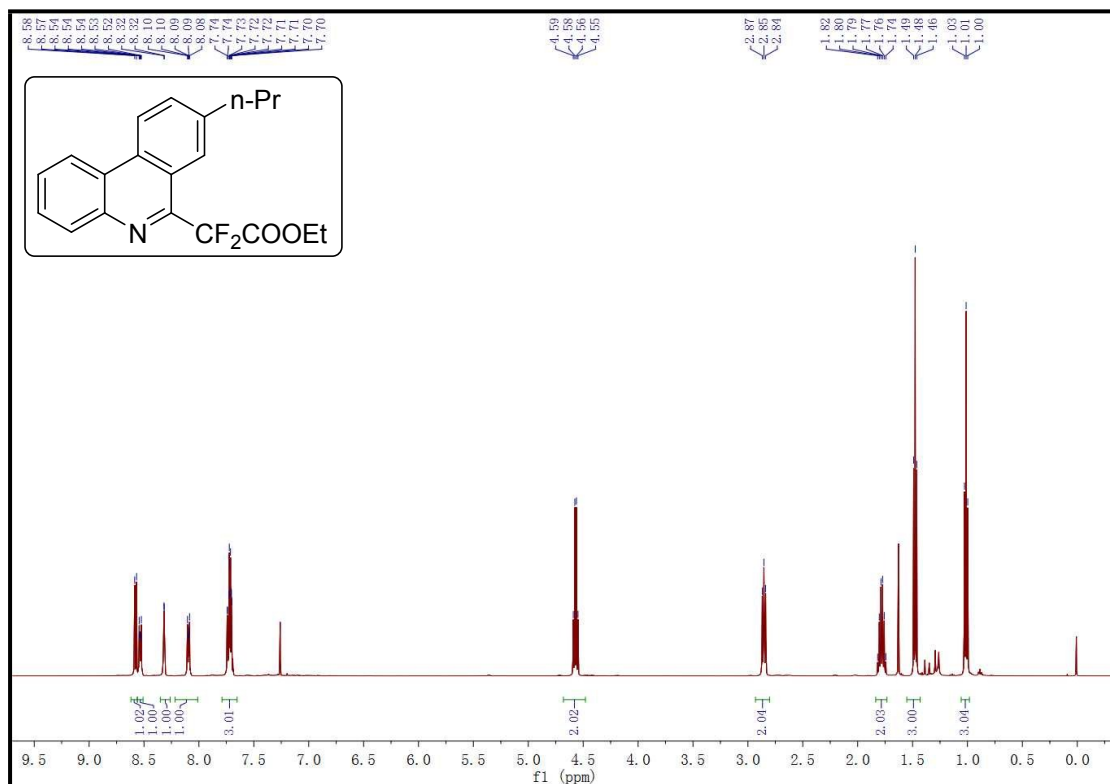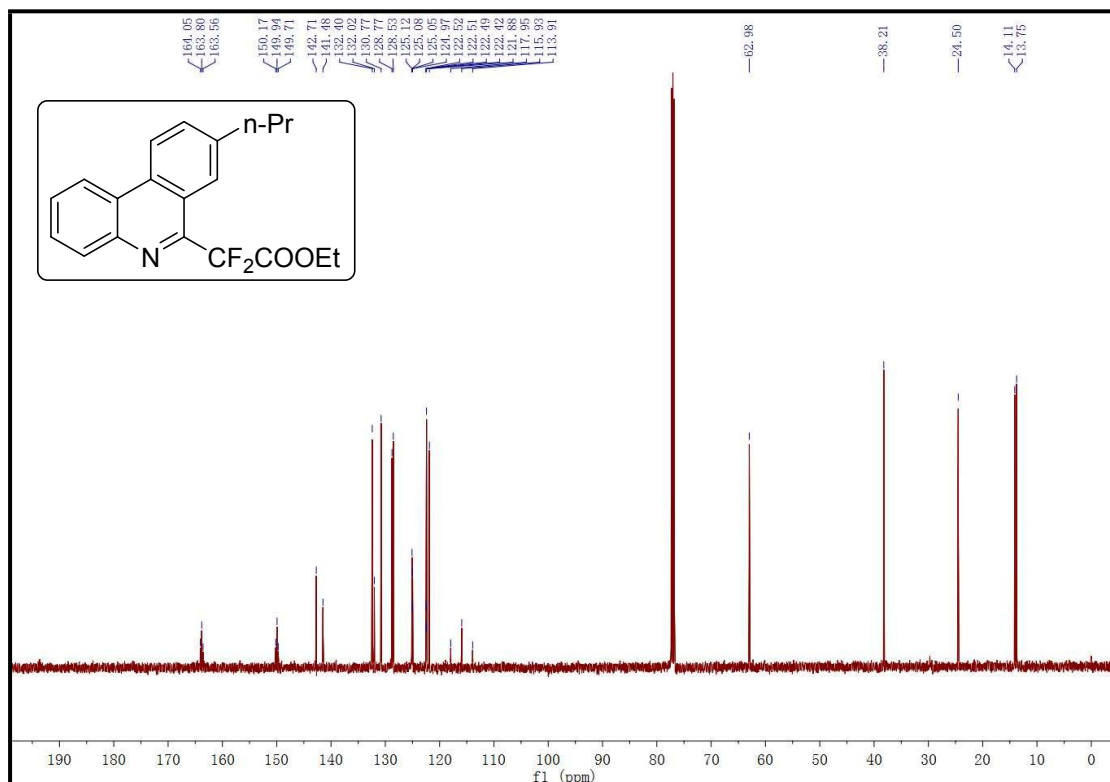

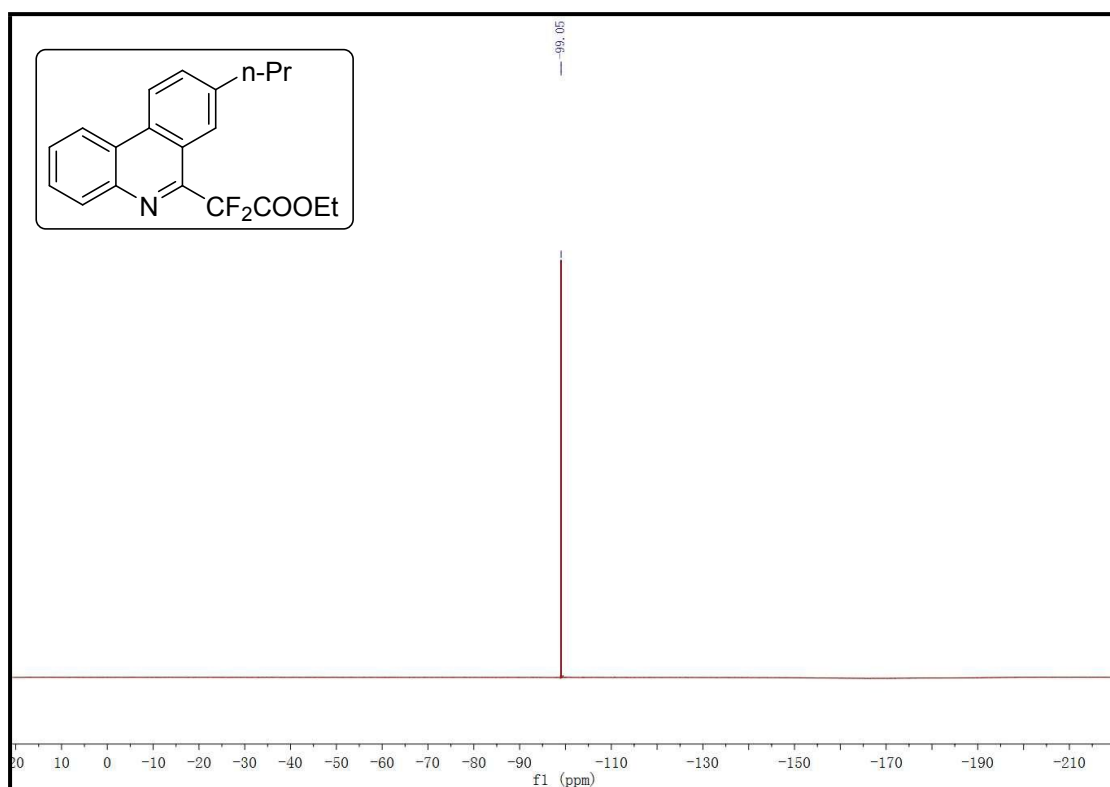

**ethyl 2-(8-(tert-butyl)phenanthridin-6-yl)-2,2-difluoroacetate (3f)**

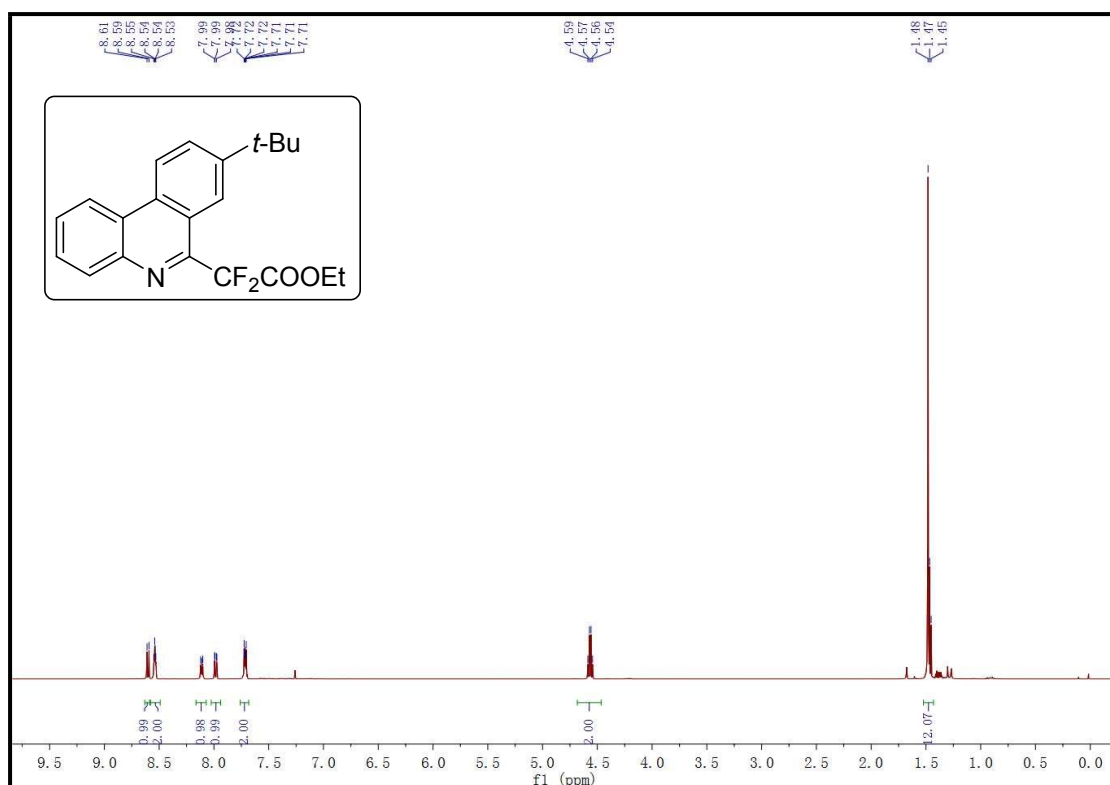

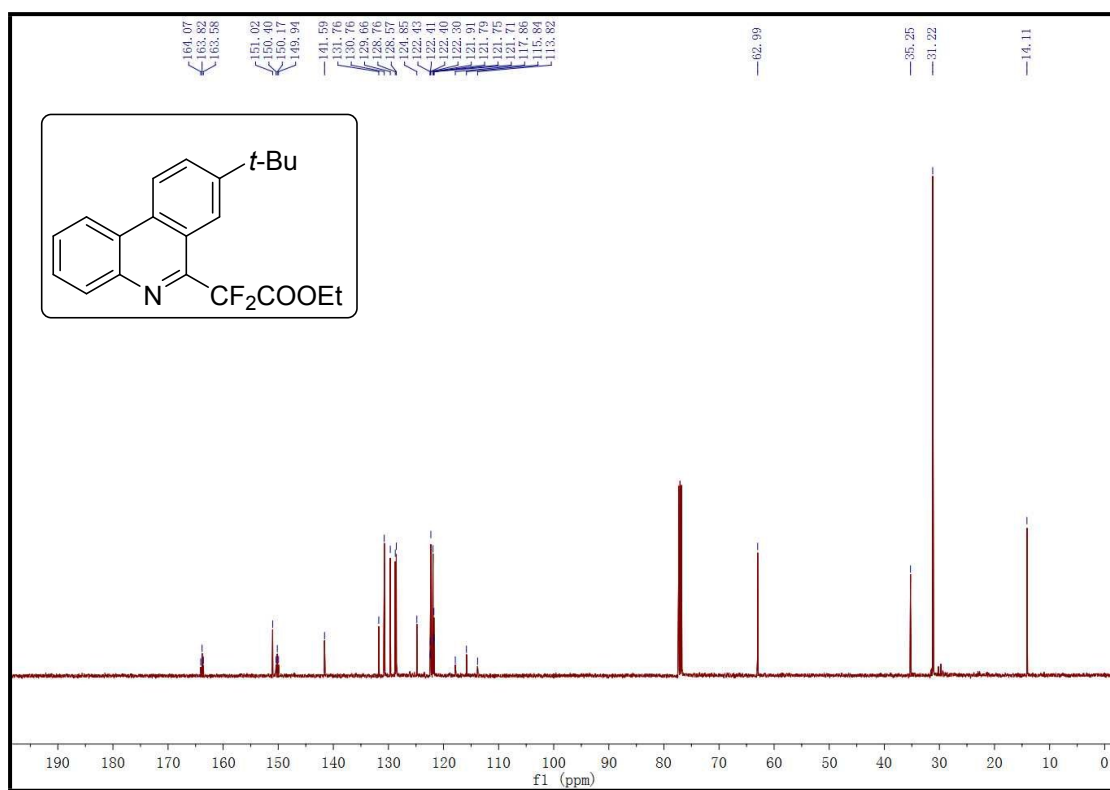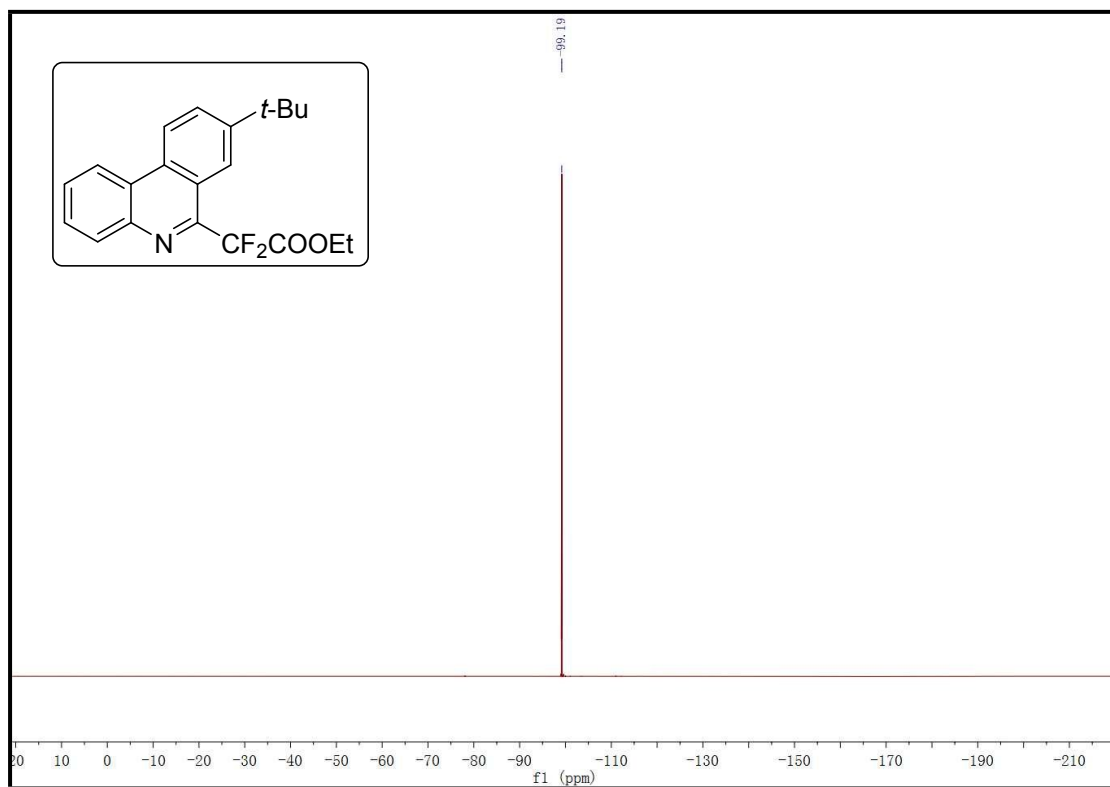

**ethyl 2,2-difluoro-2-(8-(methylthio)phenanthridin-6-yl)acetate (3g)**

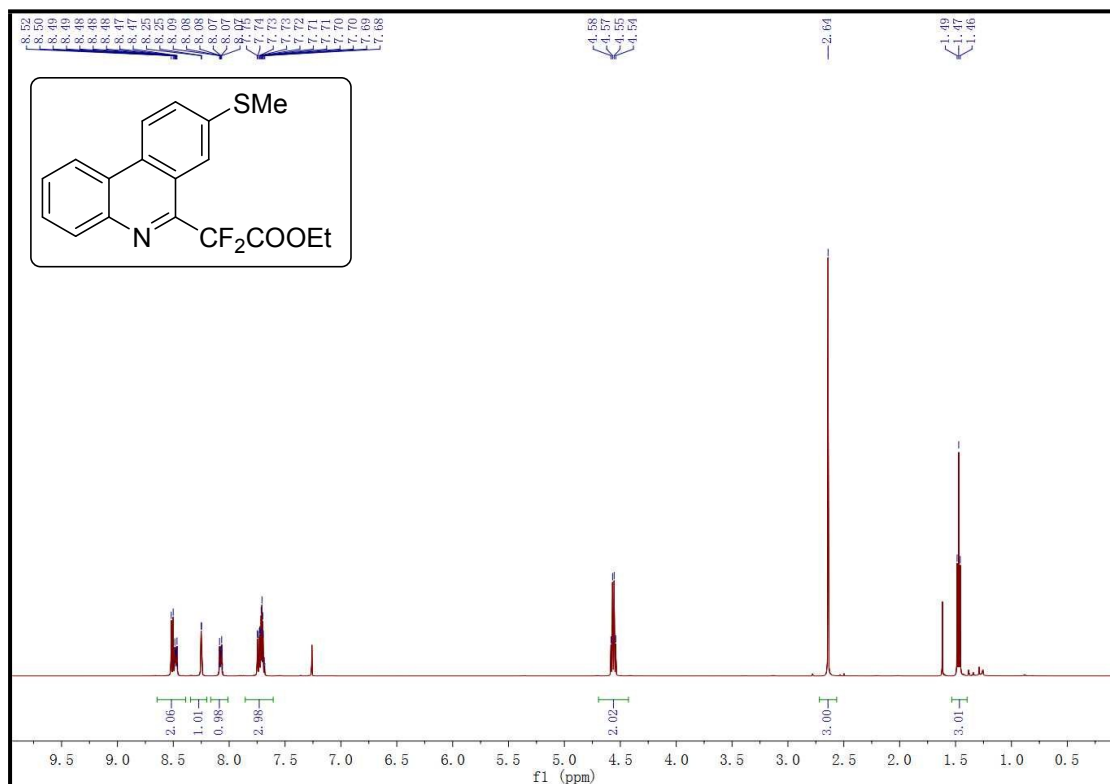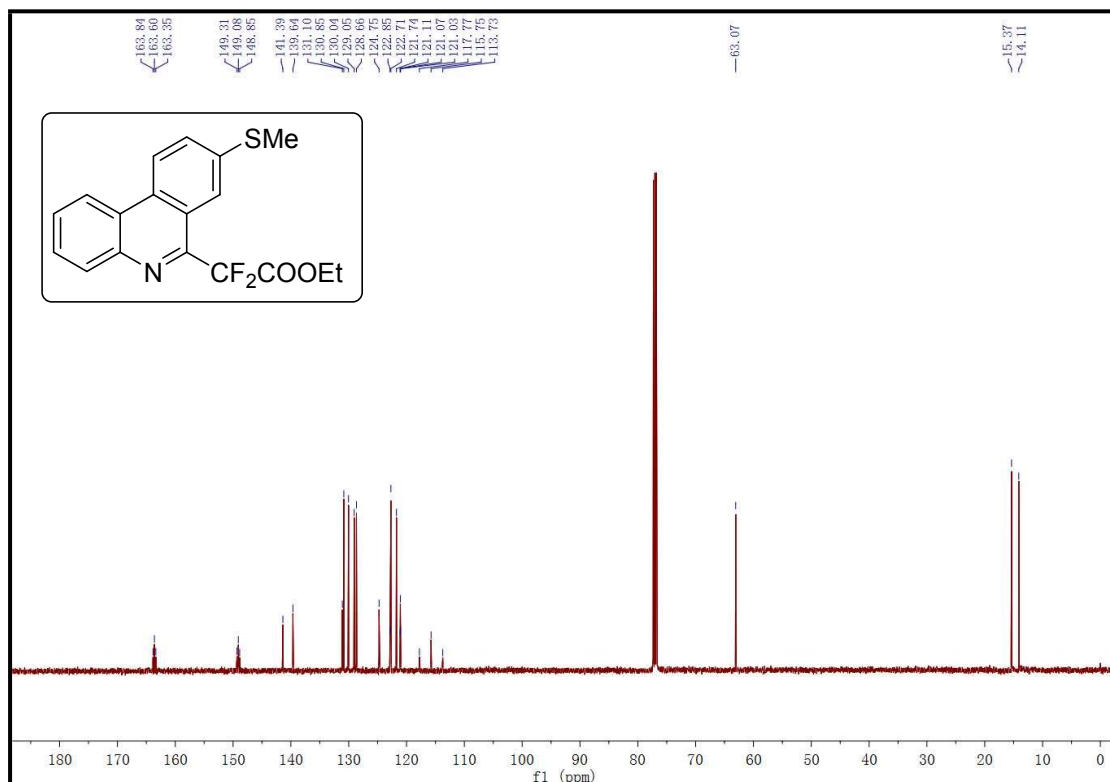



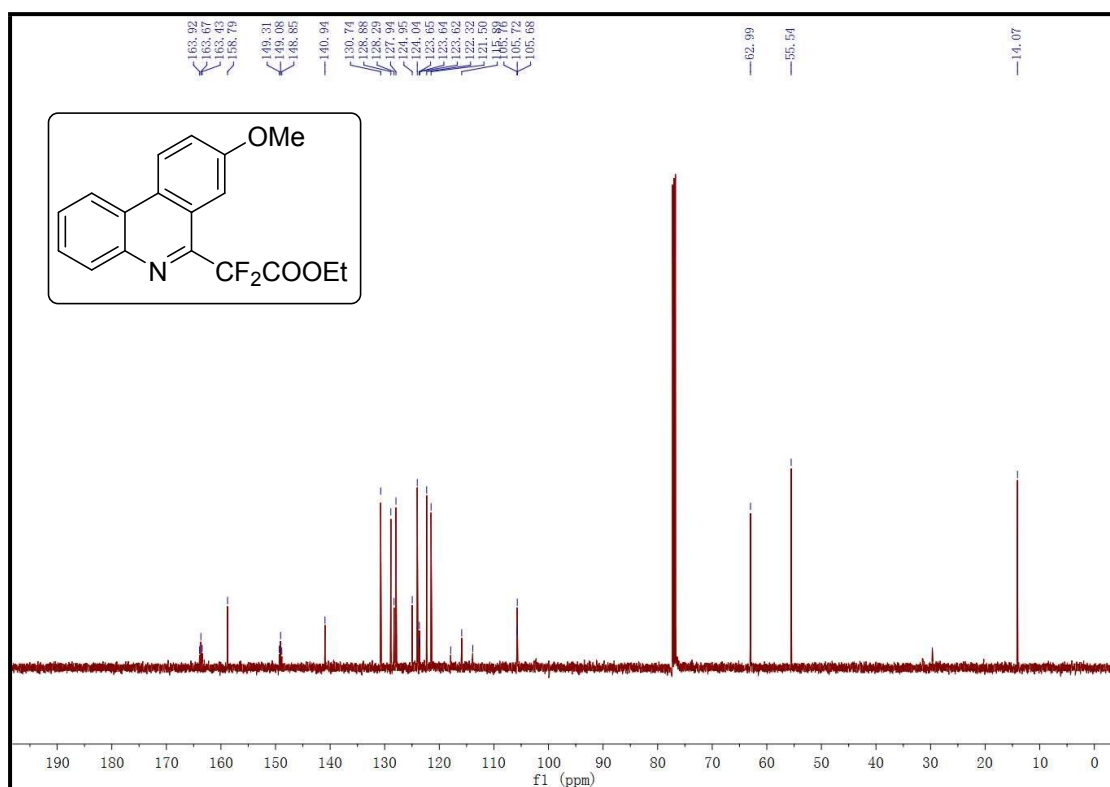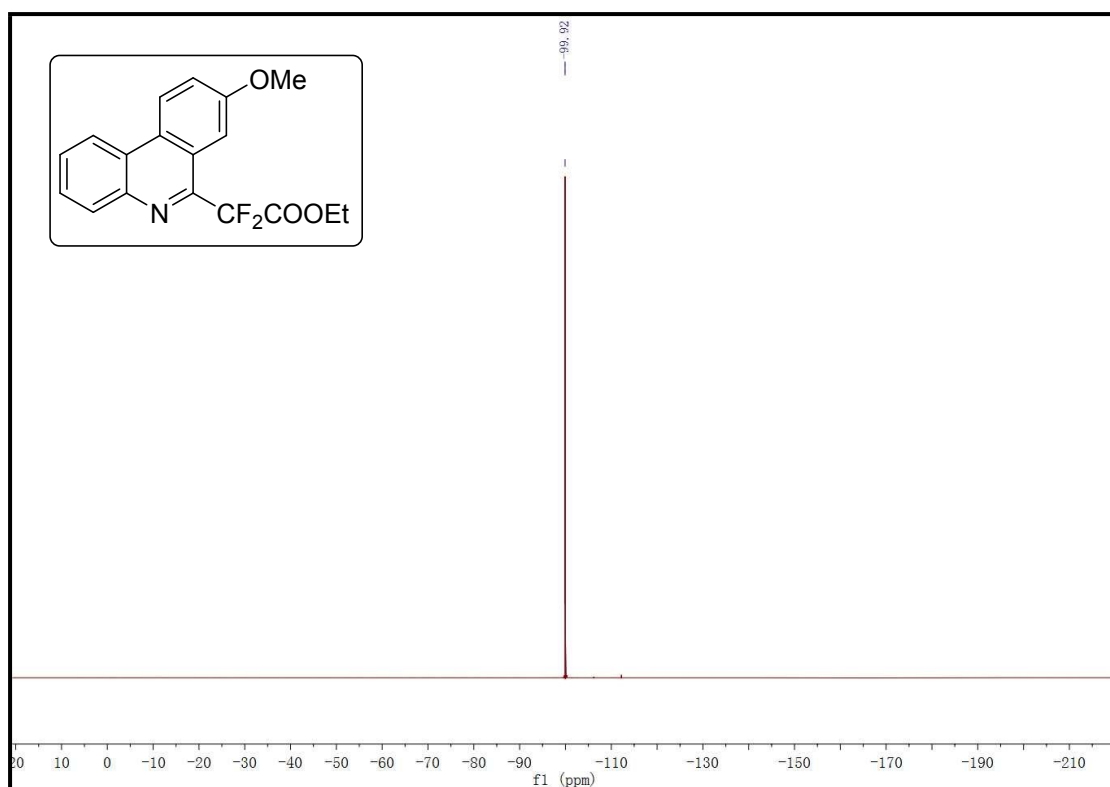

**ethyl 2,2-difluoro-2-(8-fluorophenanthridin-6-yl)acetate (3i)**

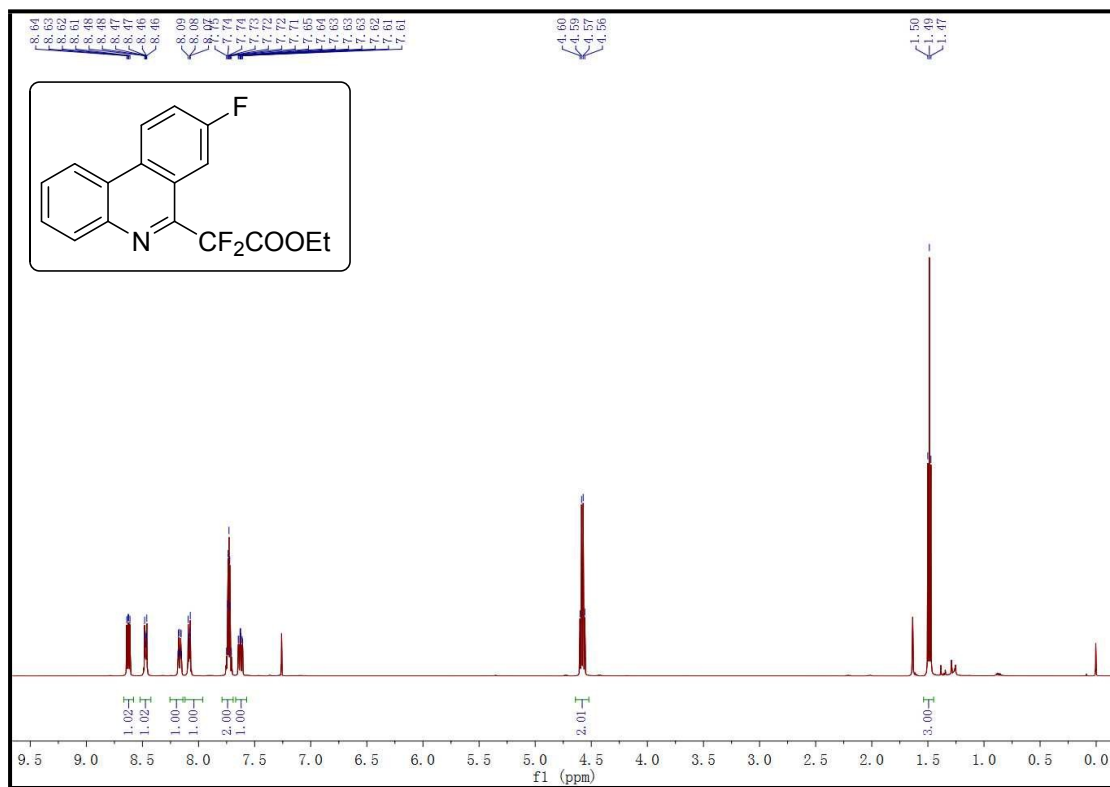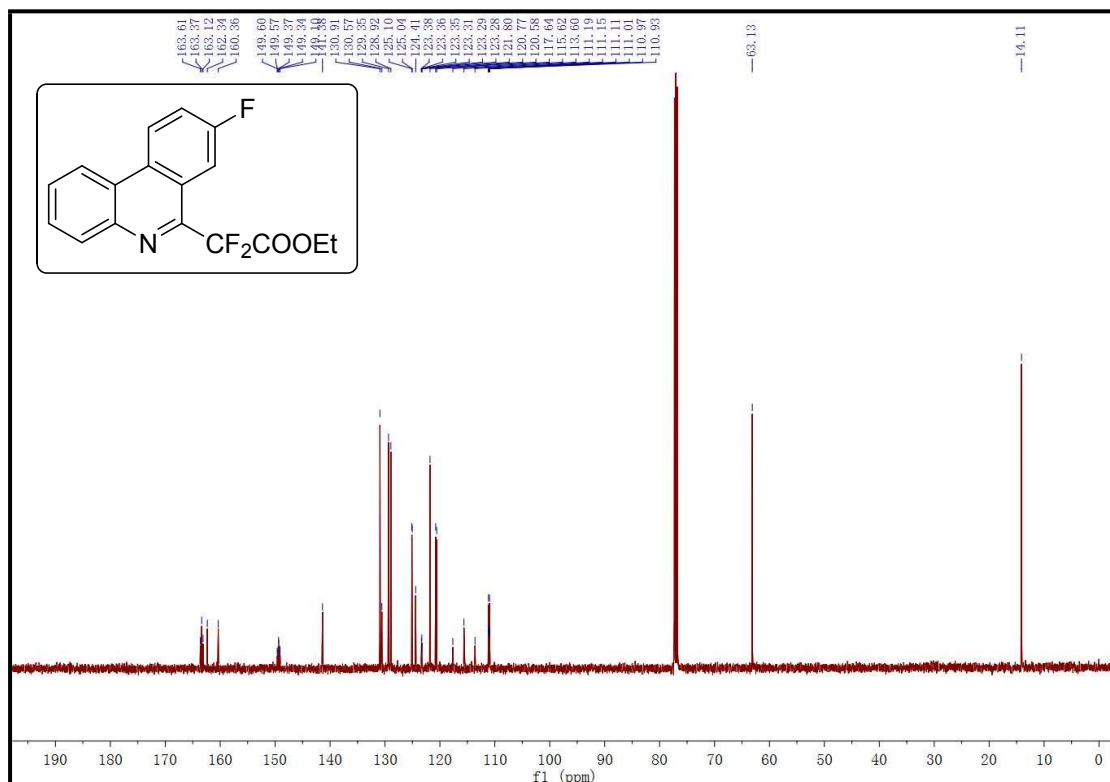

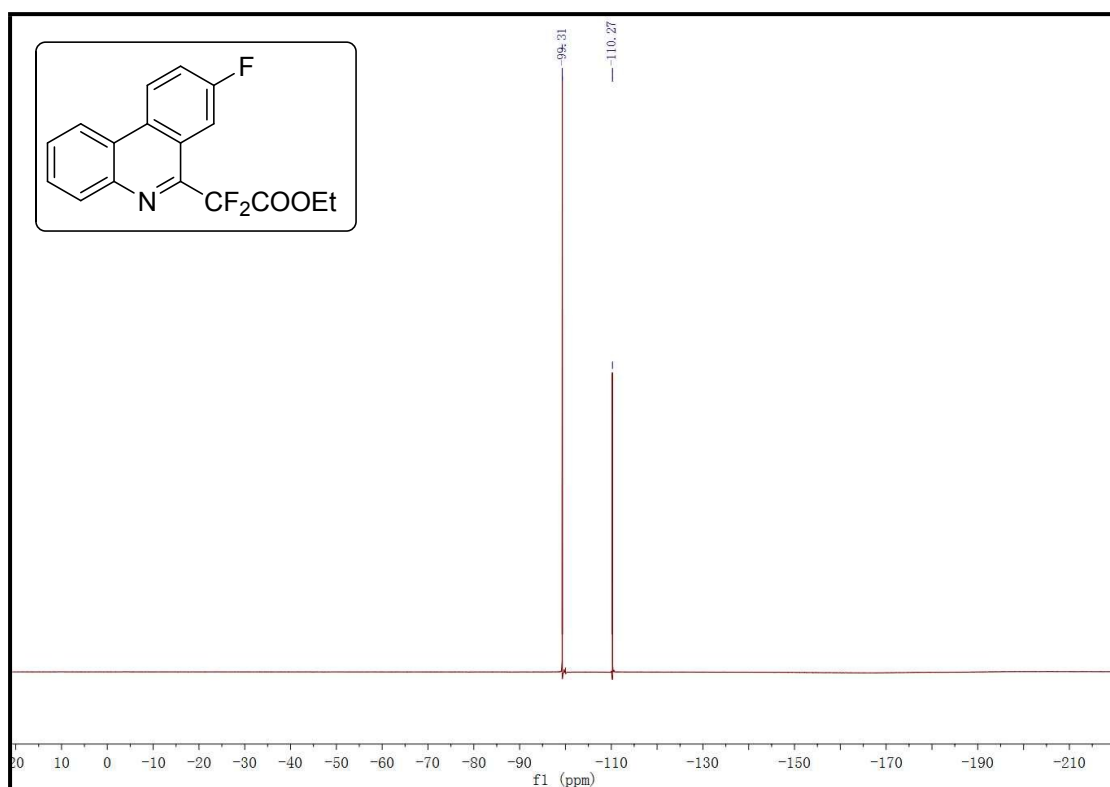

### ethyl 2-(8-chlorophenanthridin-6-yl)-2,2-difluoroacetate (3j)

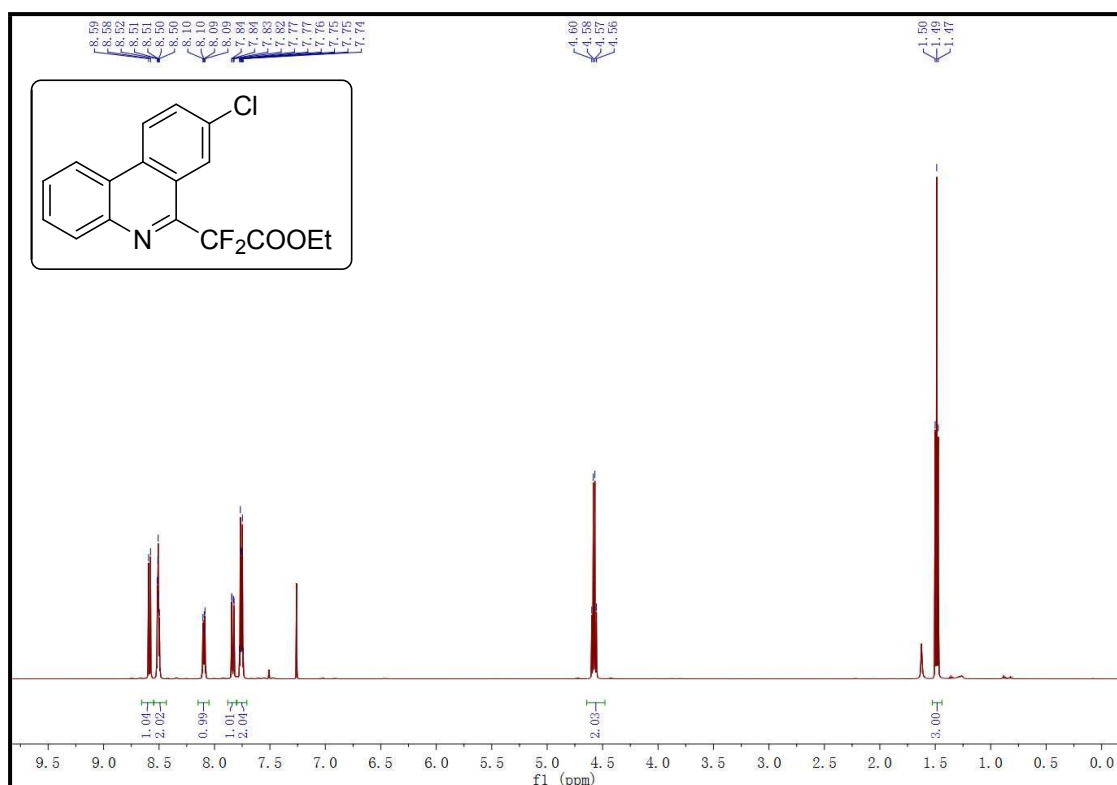



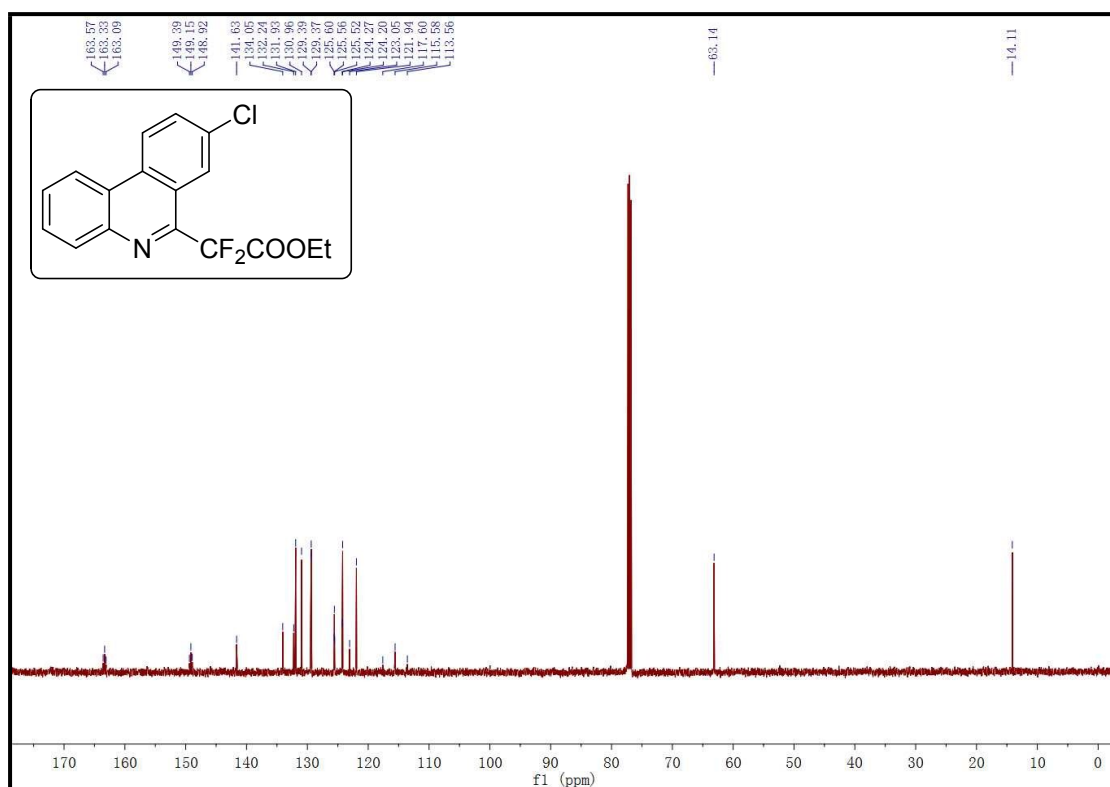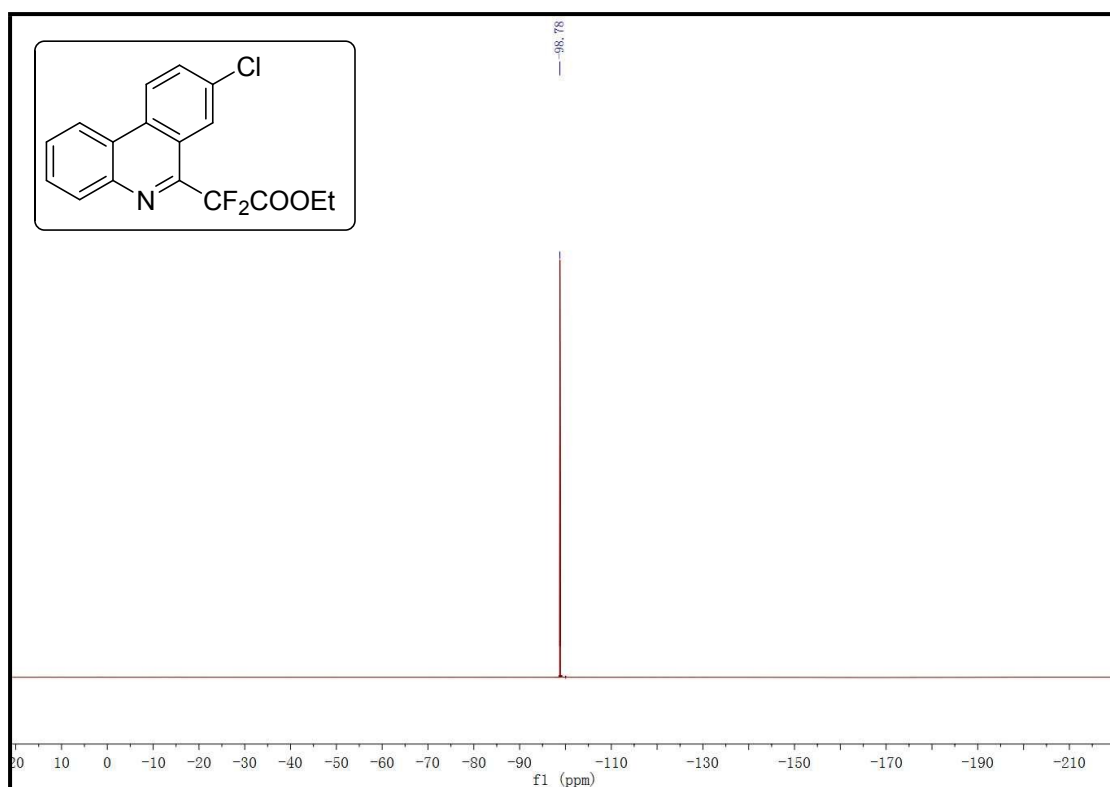

**ethyl 2-(8-bromophenanthridin-6-yl)-2,2-difluoroacetate (3k)**

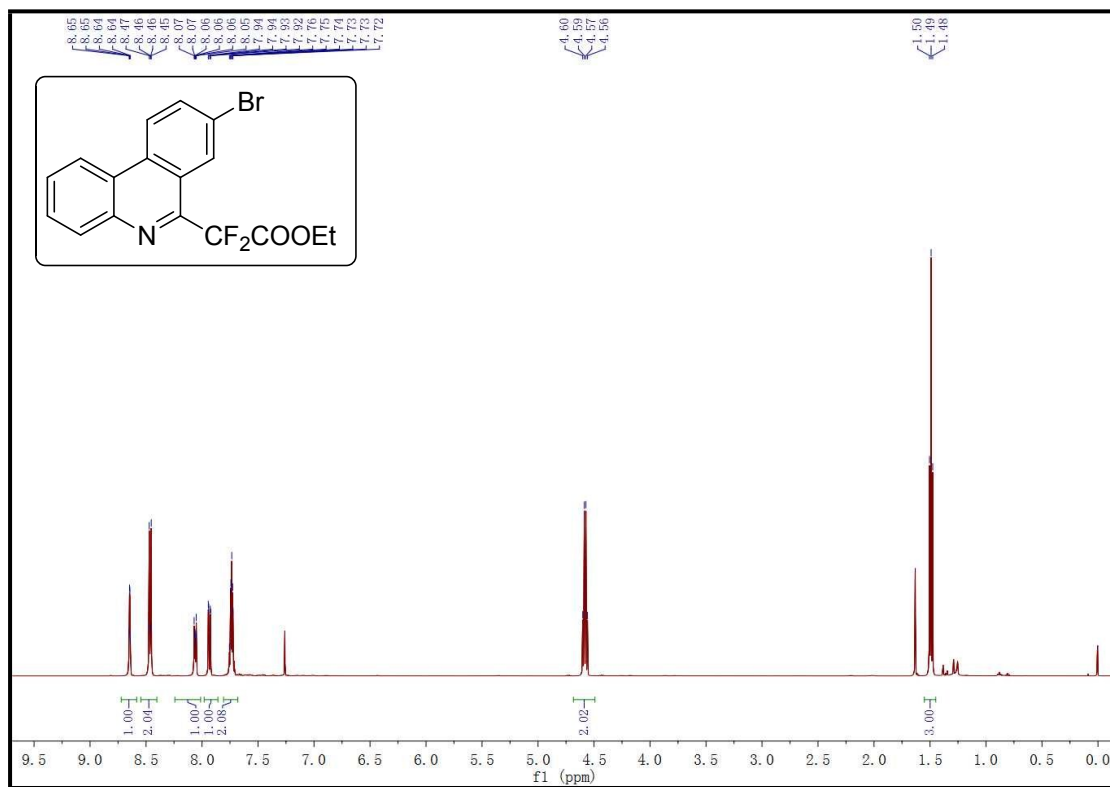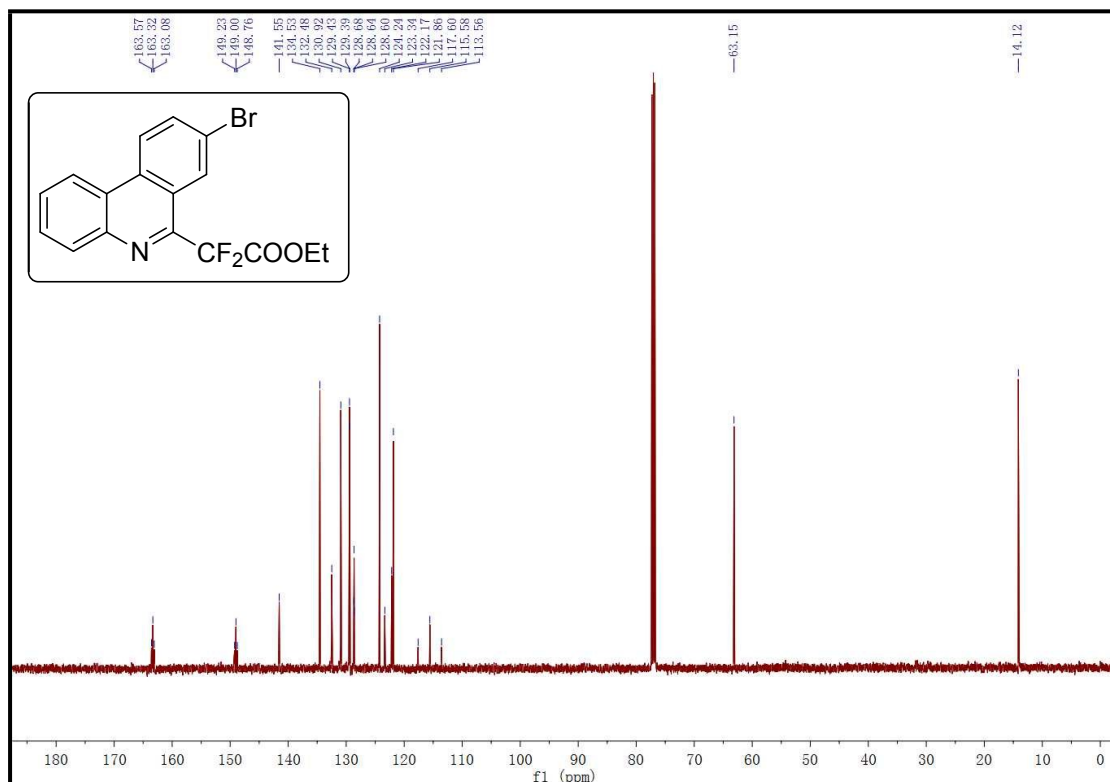

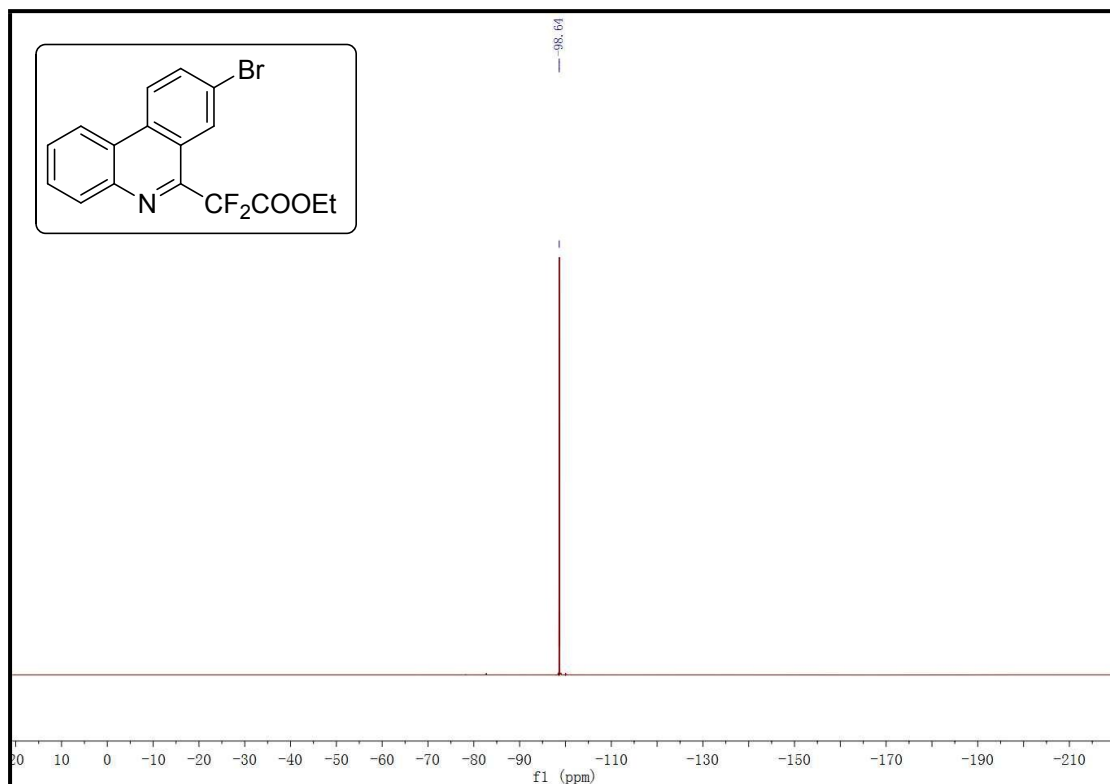

**ethyl 2,2-difluoro-2-(8-phenylphenanthridin-6-yl)acetate (3l)**

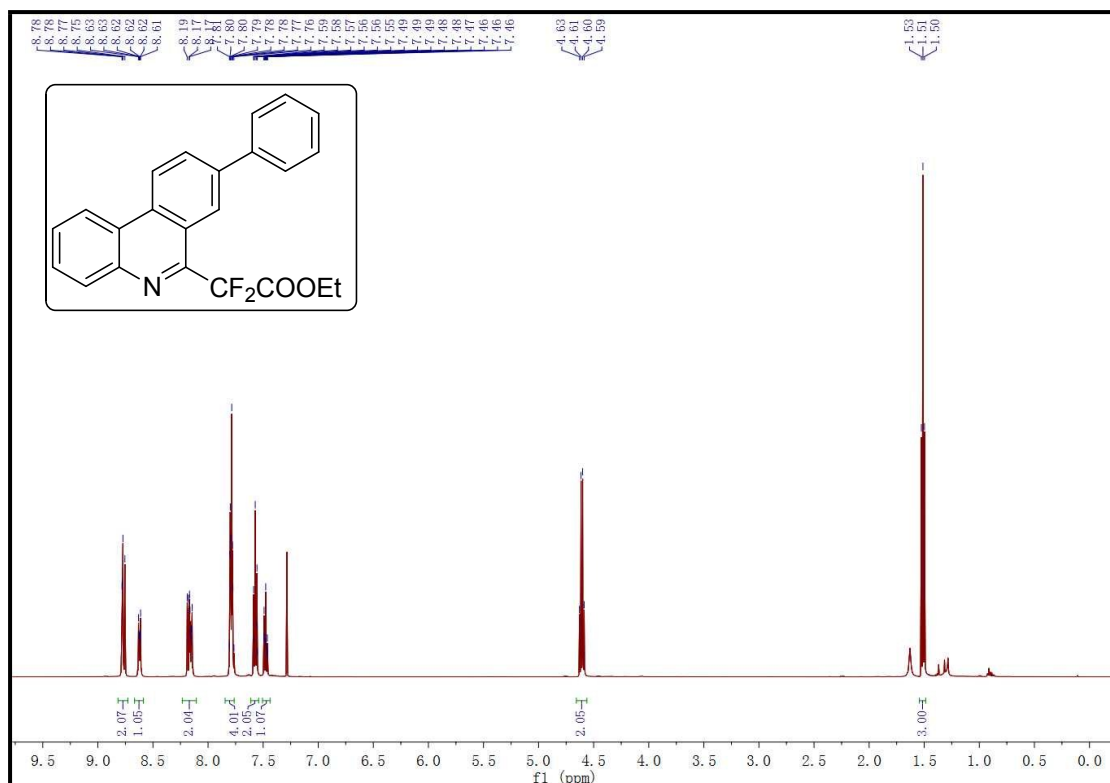

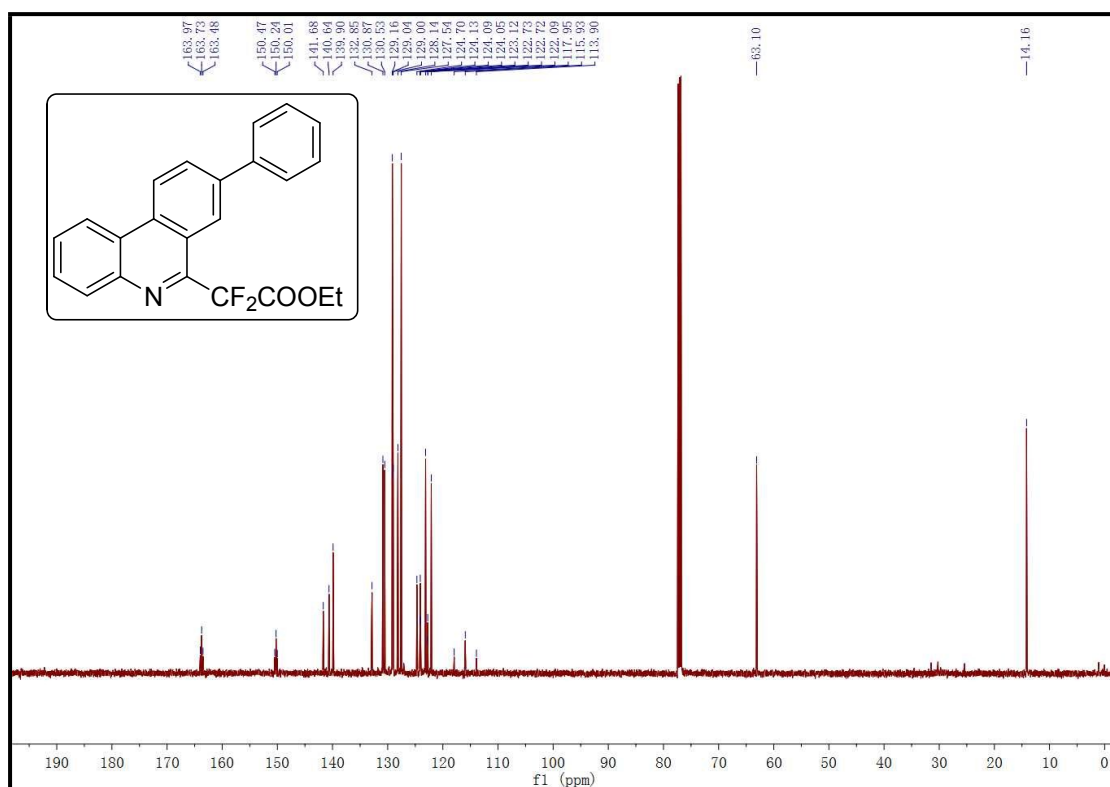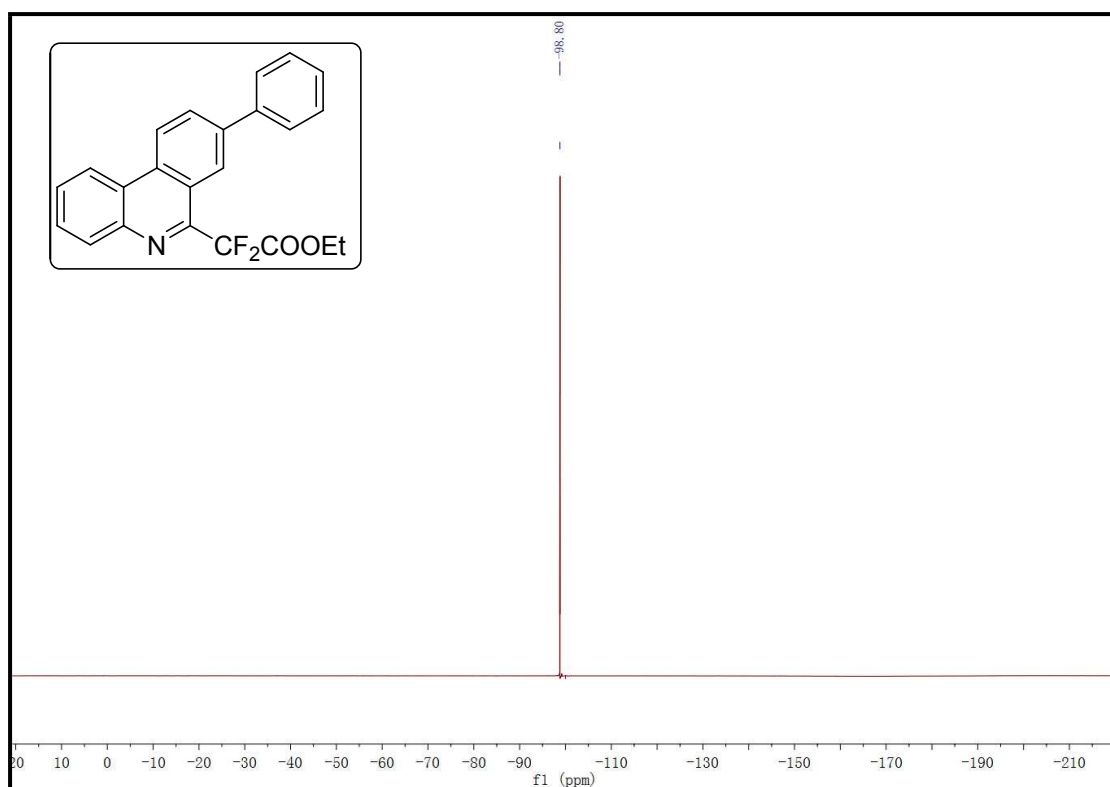

**Ethyl 6-(2-ethoxy-1,1-difluoro-2-oxoethyl)phenanthridine-8-carboxylate (3m)**

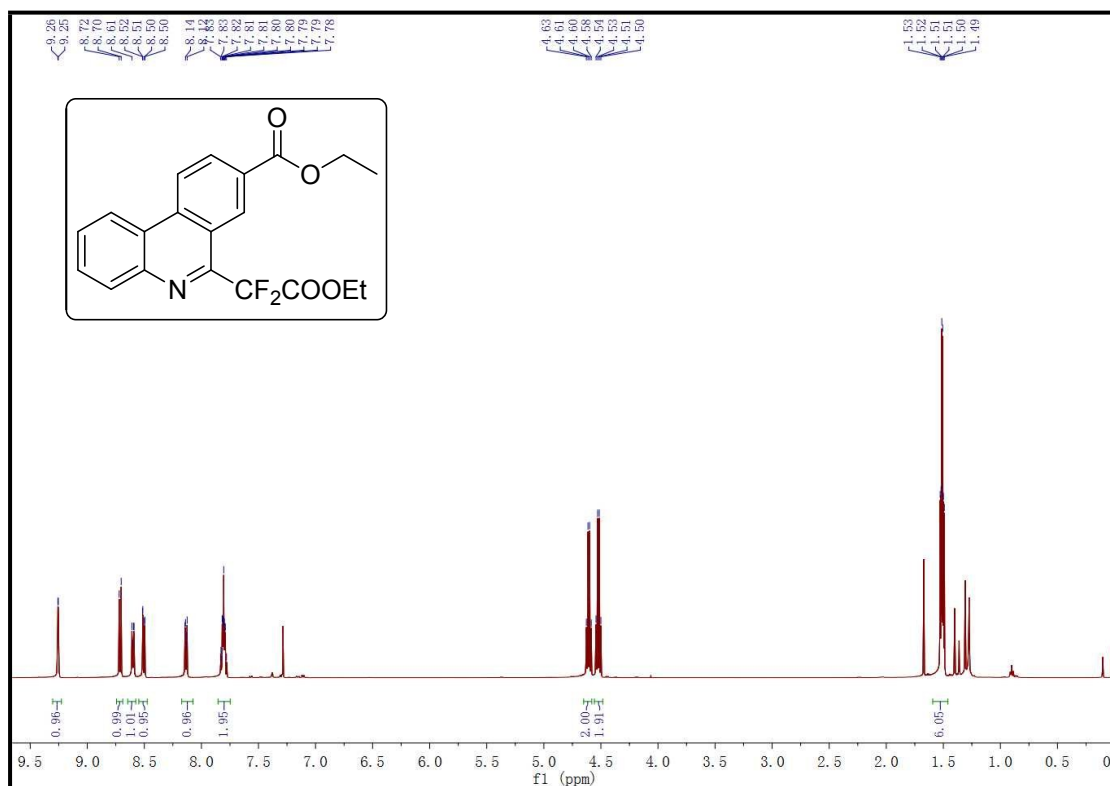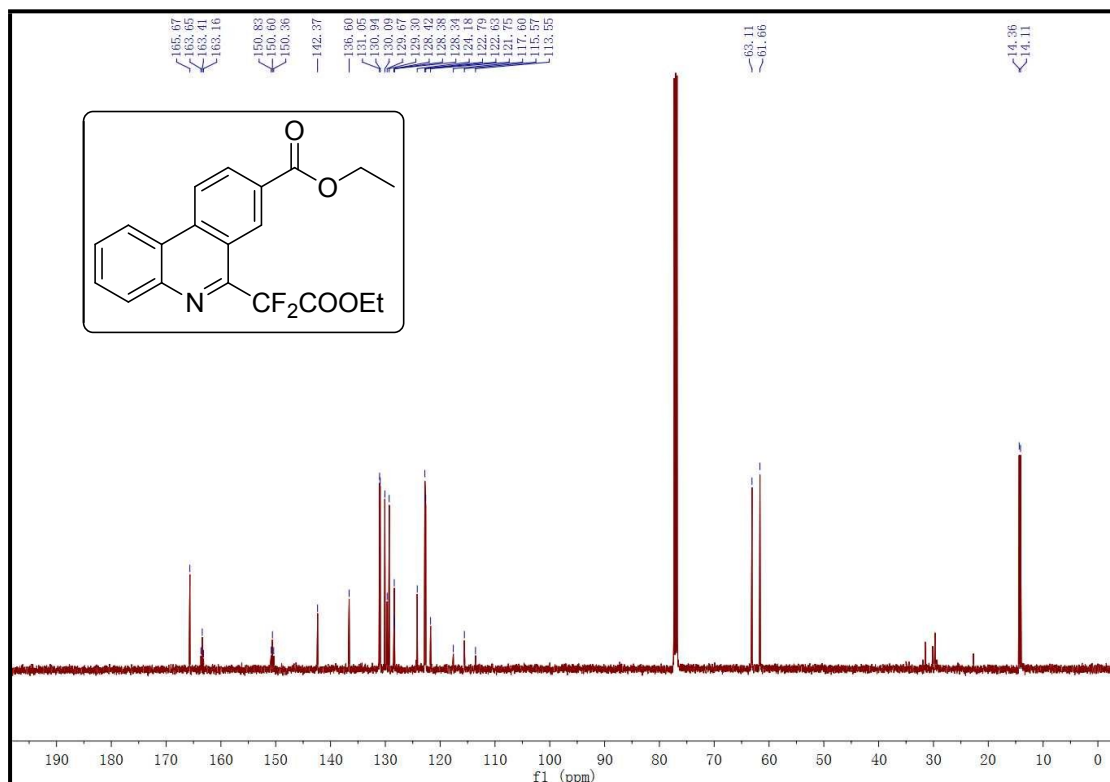

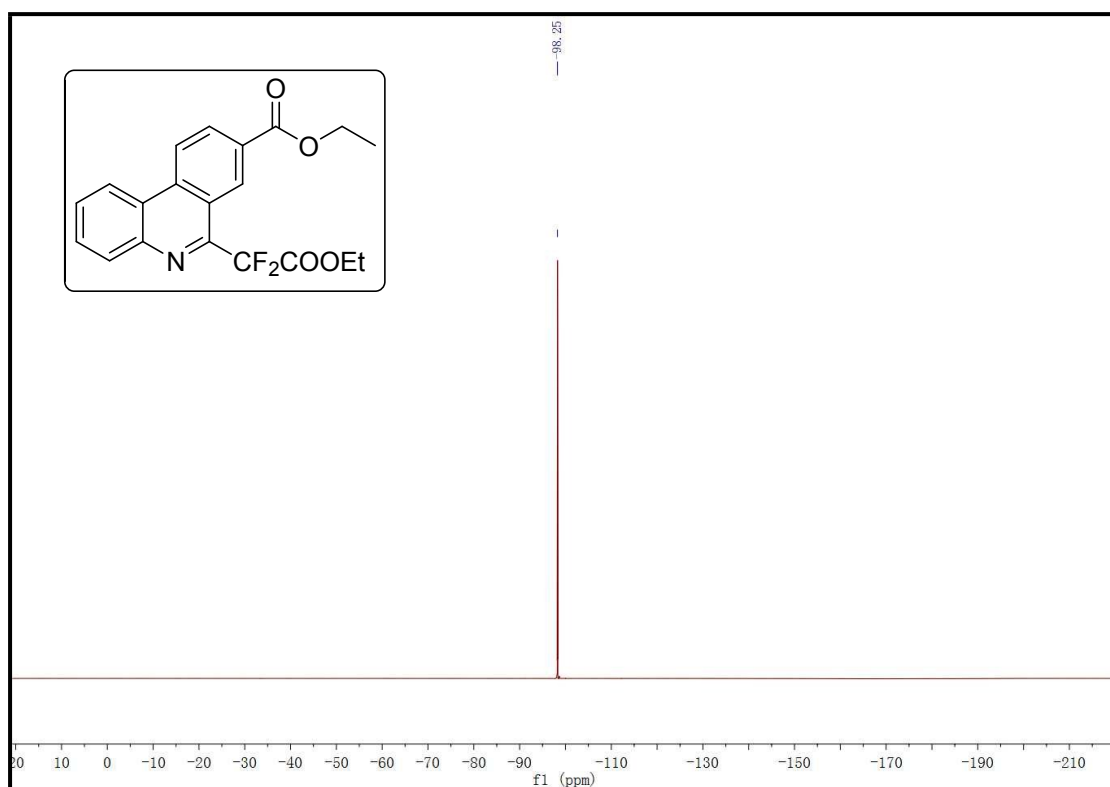

**ethyl 2-(8-acetylphenanthridin-6-yl)-2,2-difluoroacetate(3n)**

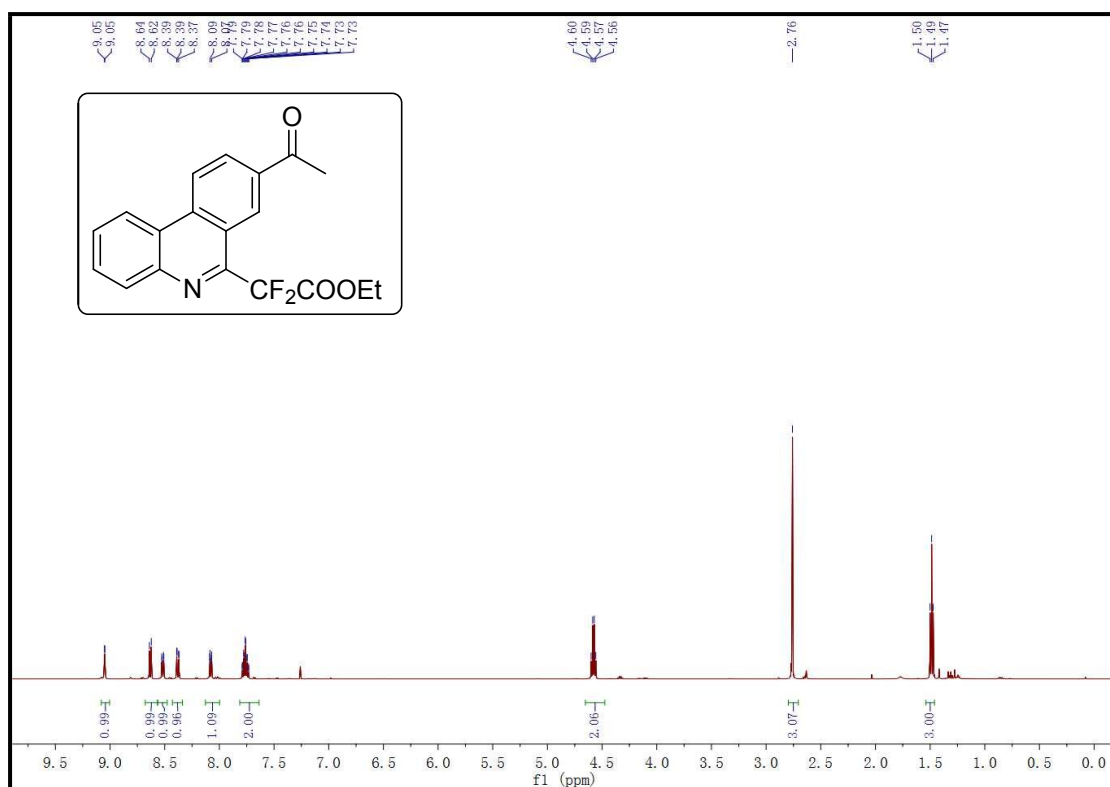

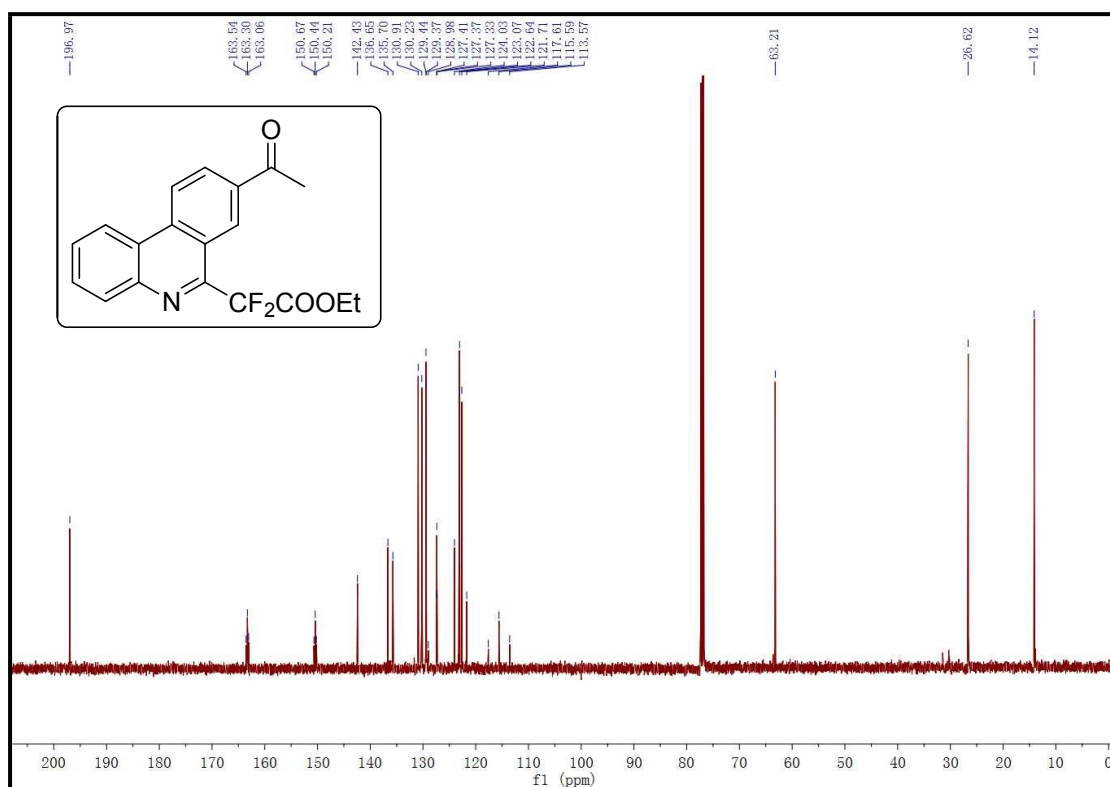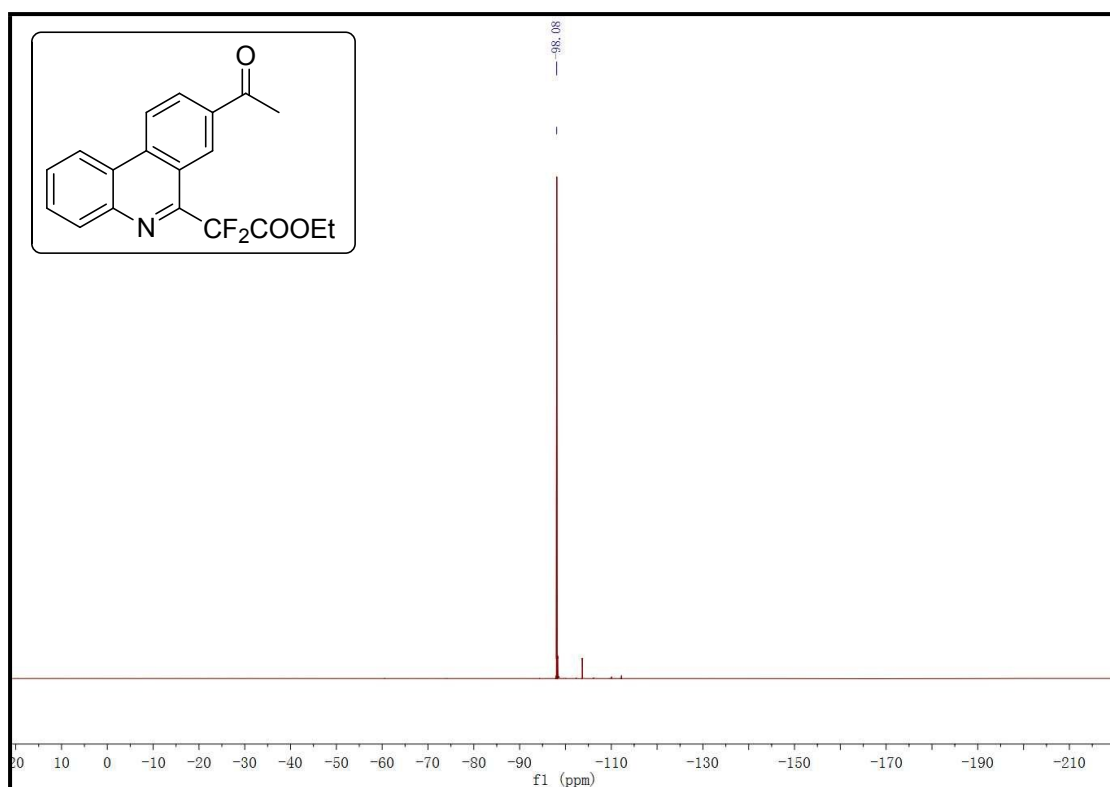

ethyl 2,2-difluoro-2-(8-(trifluoromethyl)phenanthridin-6-yl)acetate

(30)

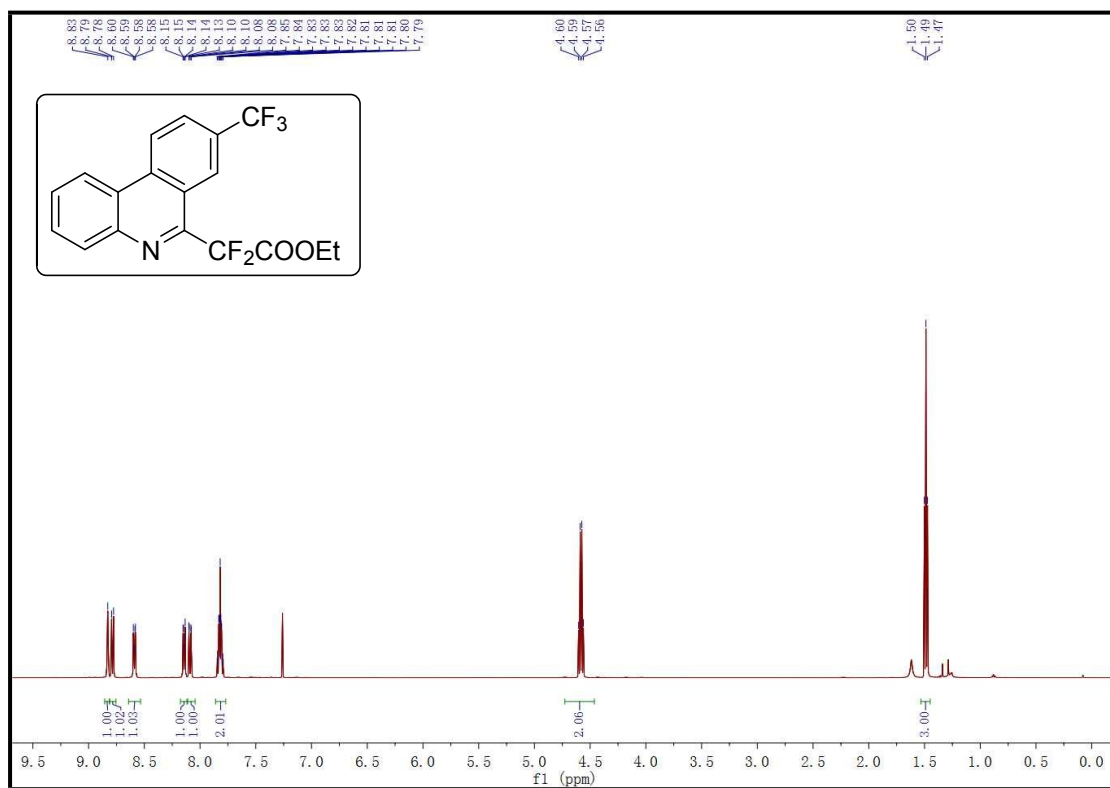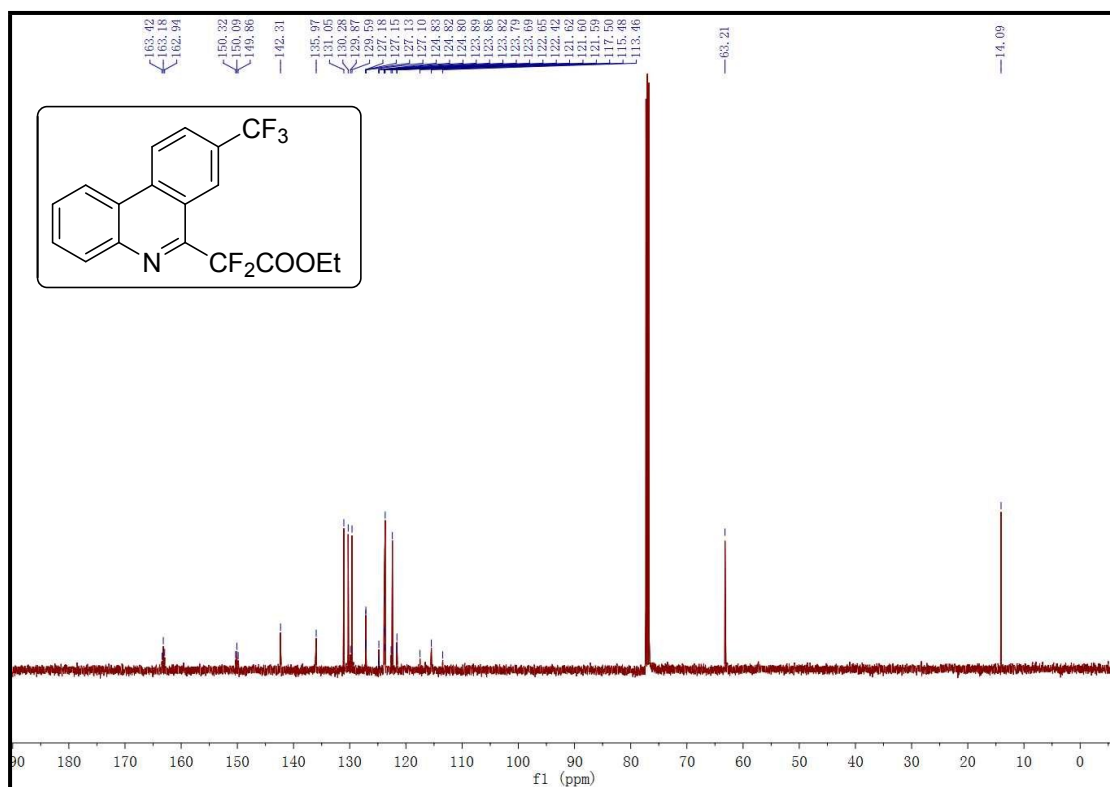



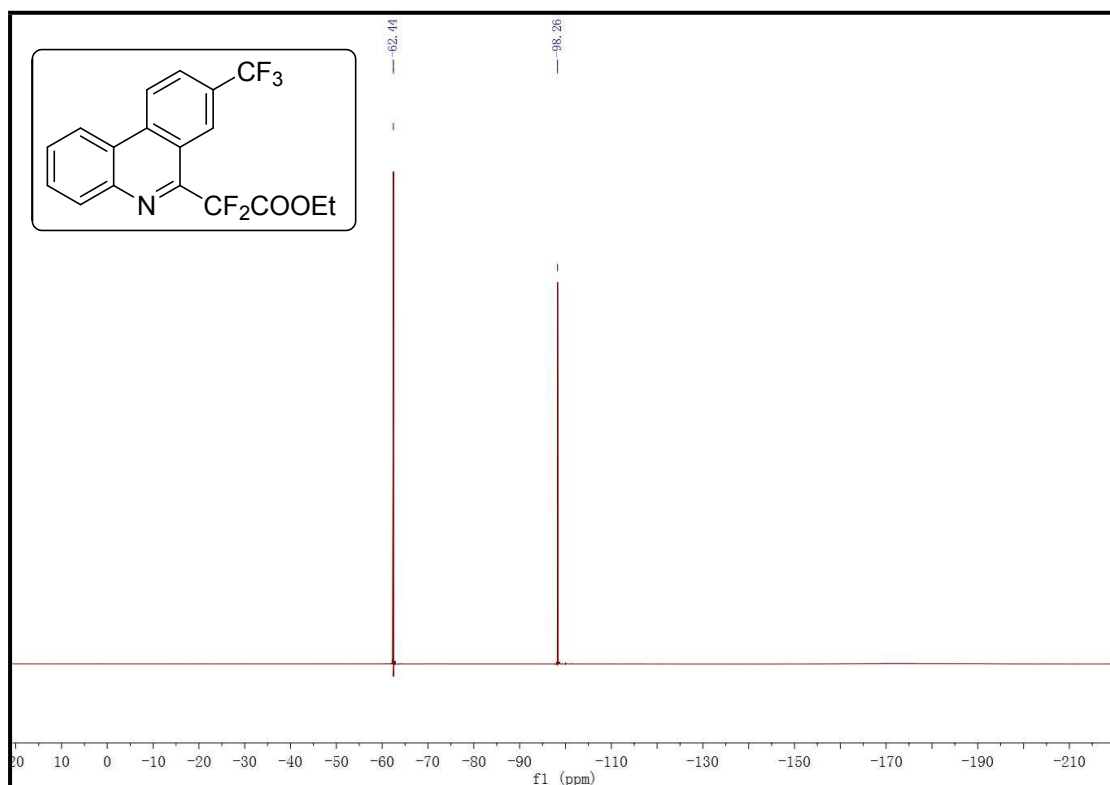

**ethyl 2-(7,9-dimethylphenanthridin-6-yl)-2,2-difluoroacetate (3p)**

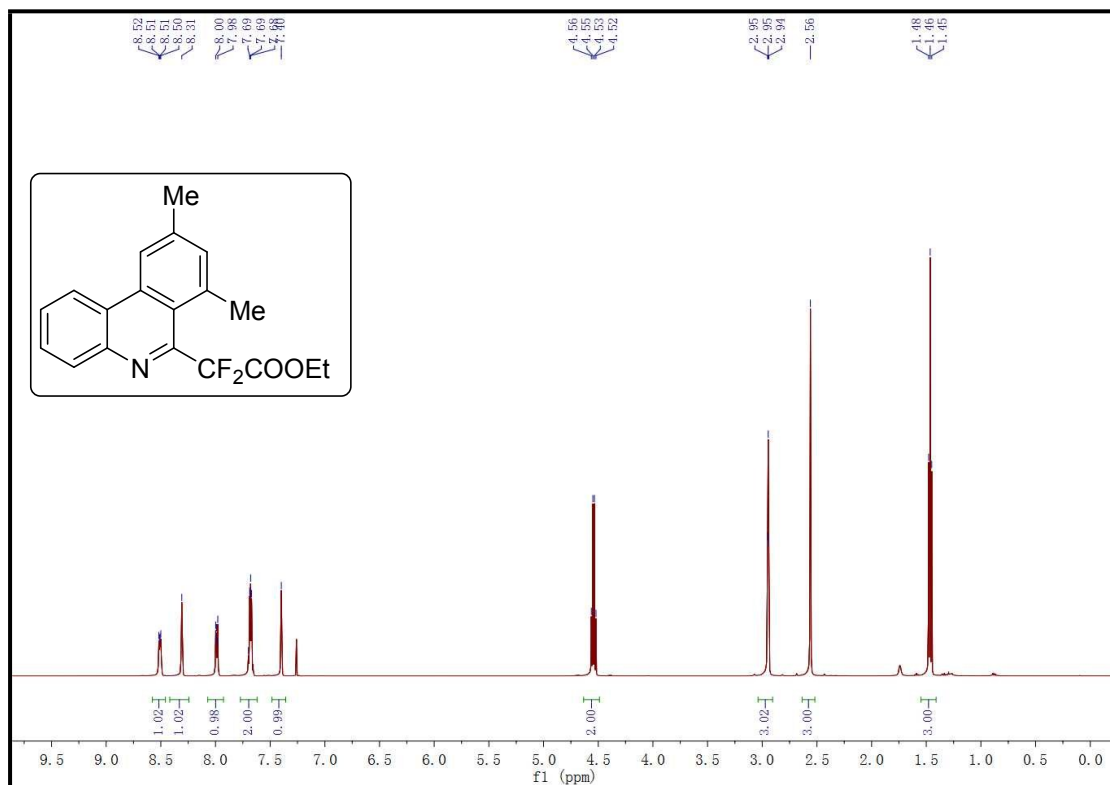

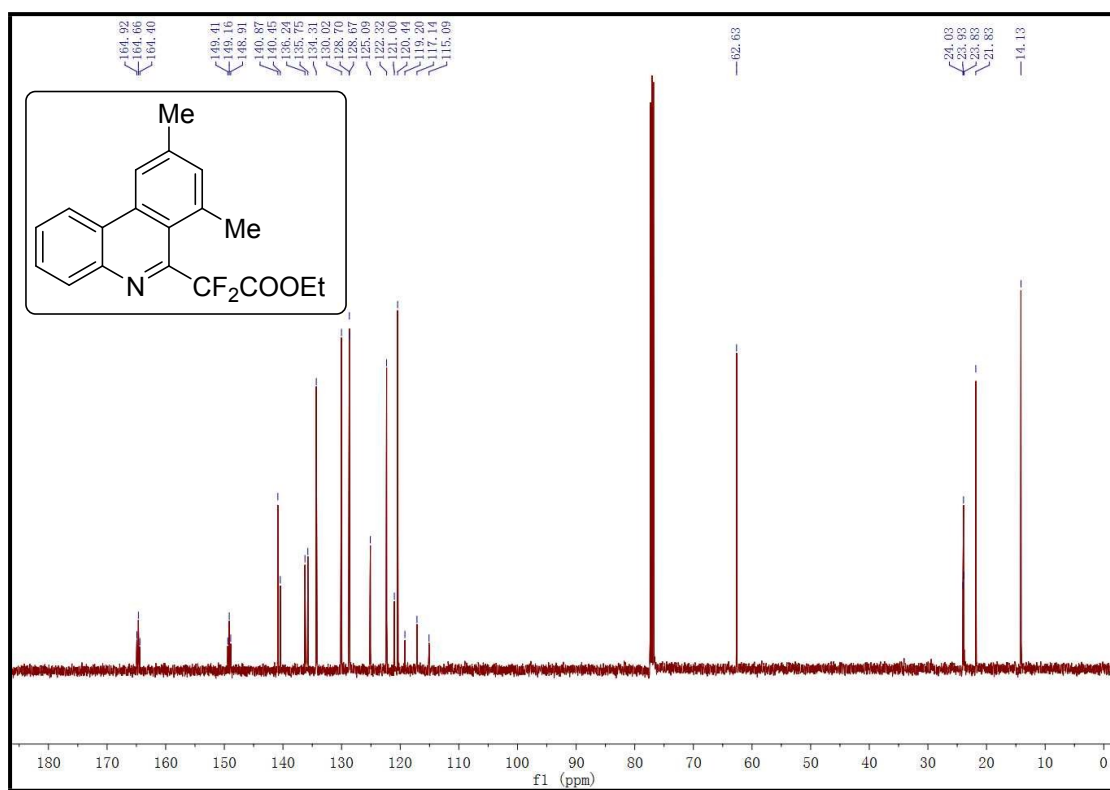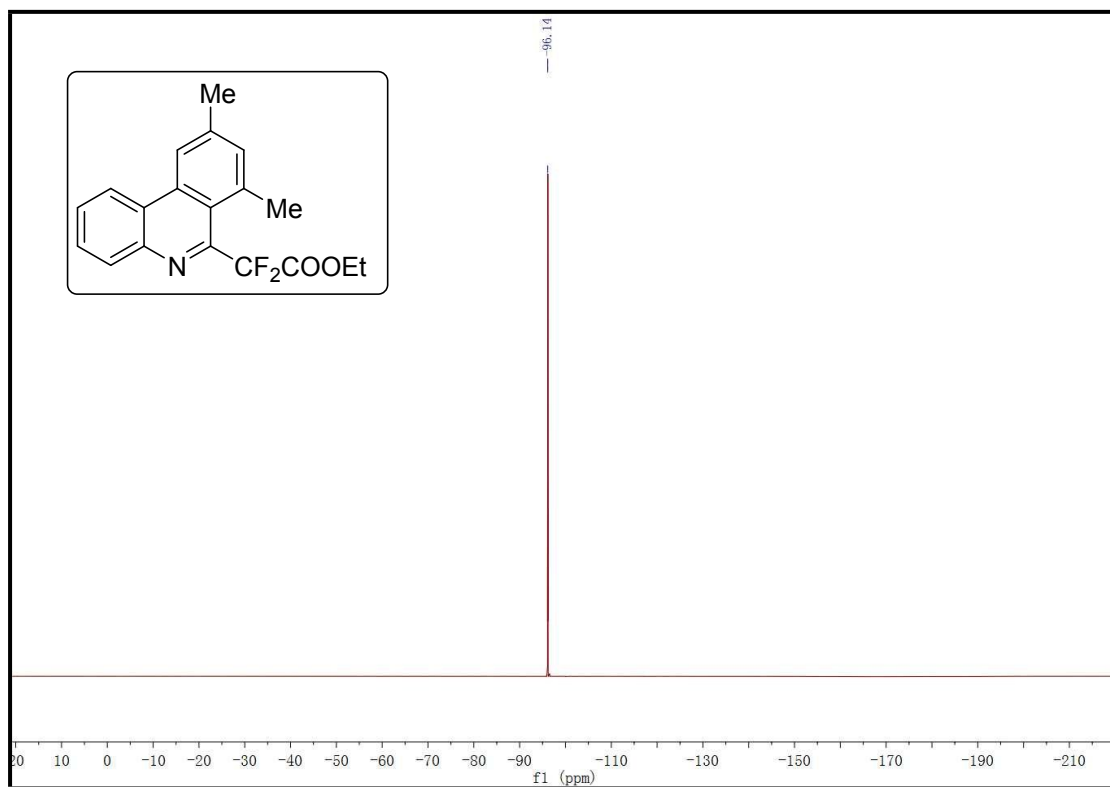

**ethyl 2-(benzo[i]phenanthridin-5-yl)-2,2-difluoroacetate (3q)**

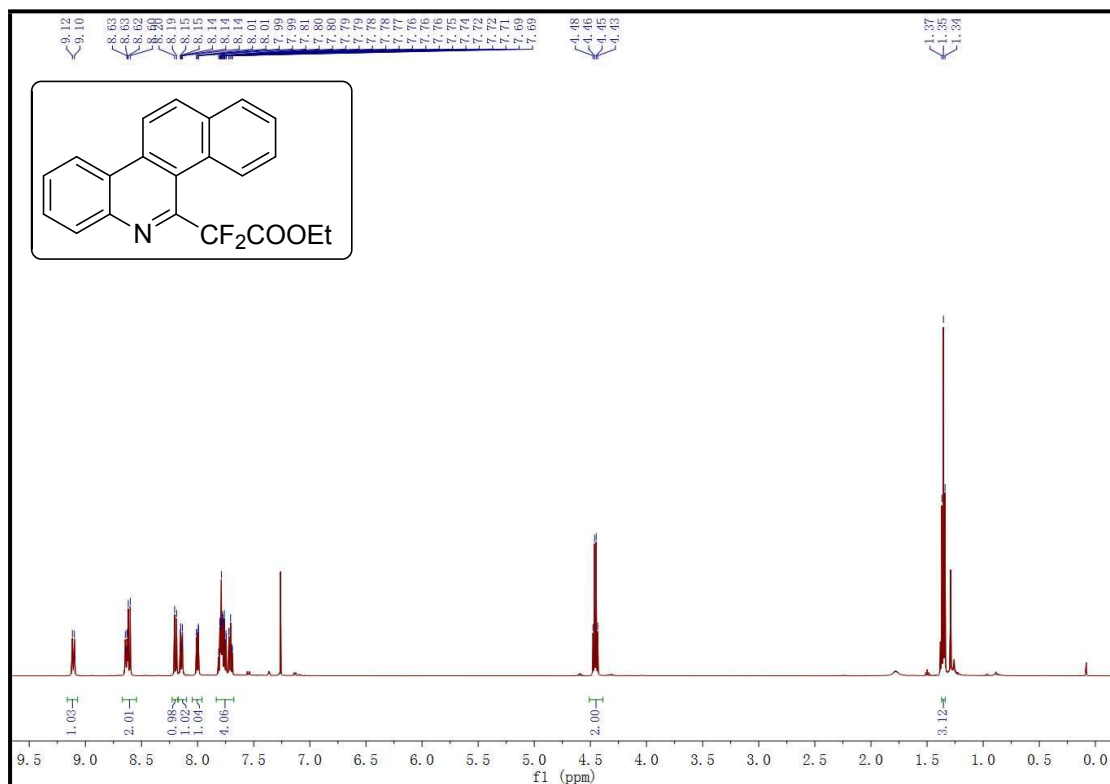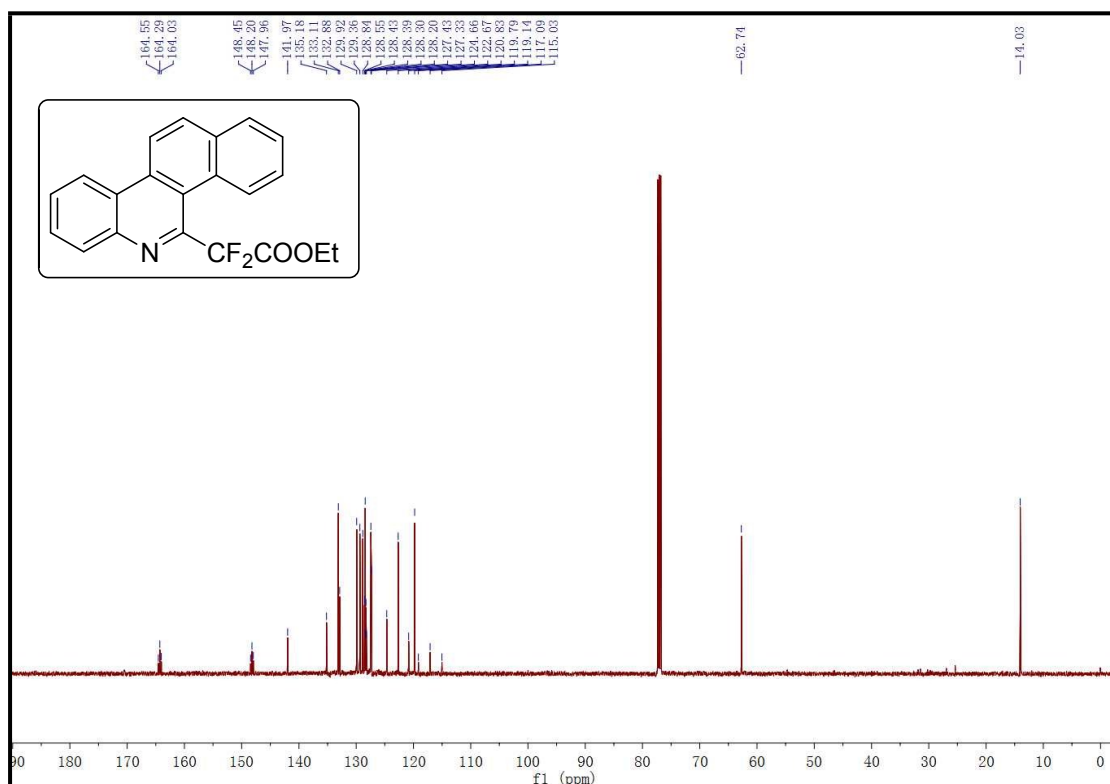

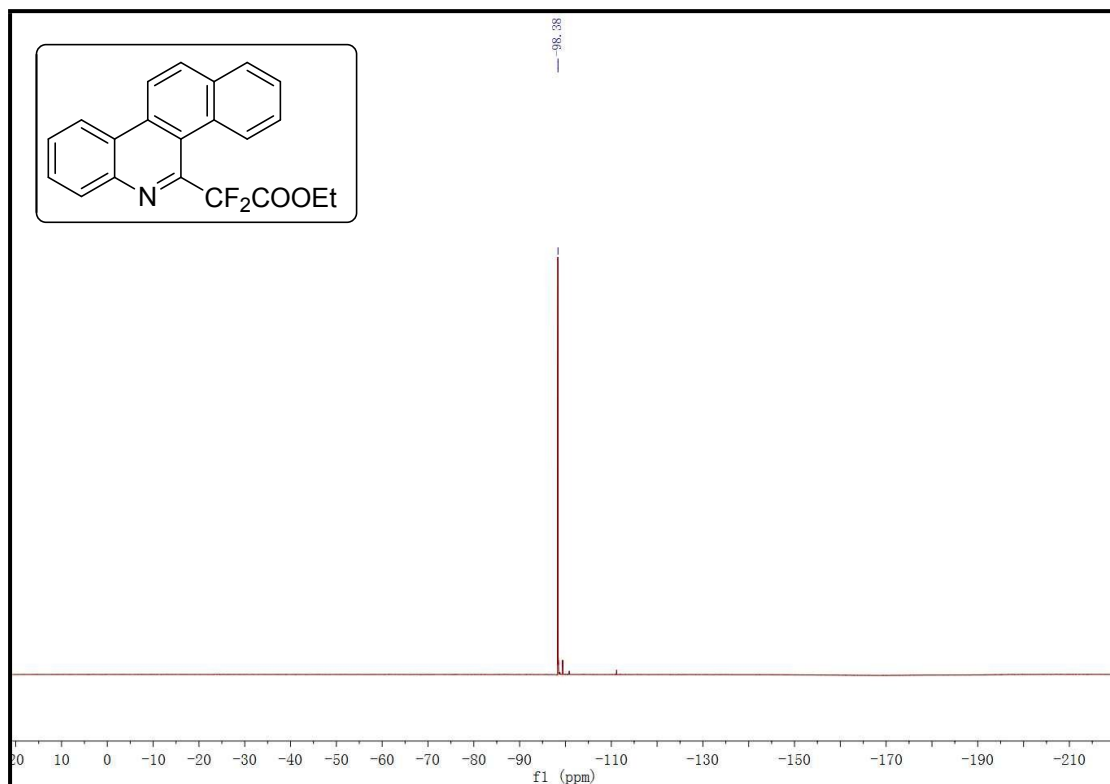

**ethyl 2-(9-chlorophenanthridin-6-yl)-2,2-difluoroacetate (3r)**

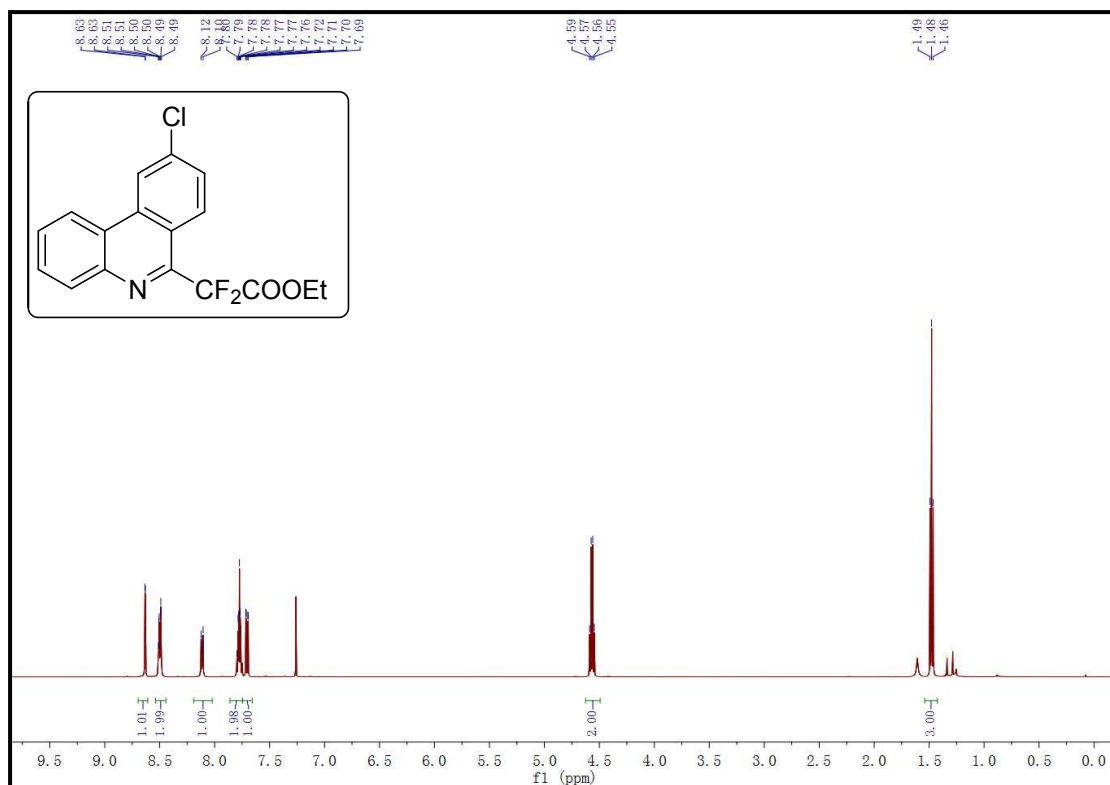

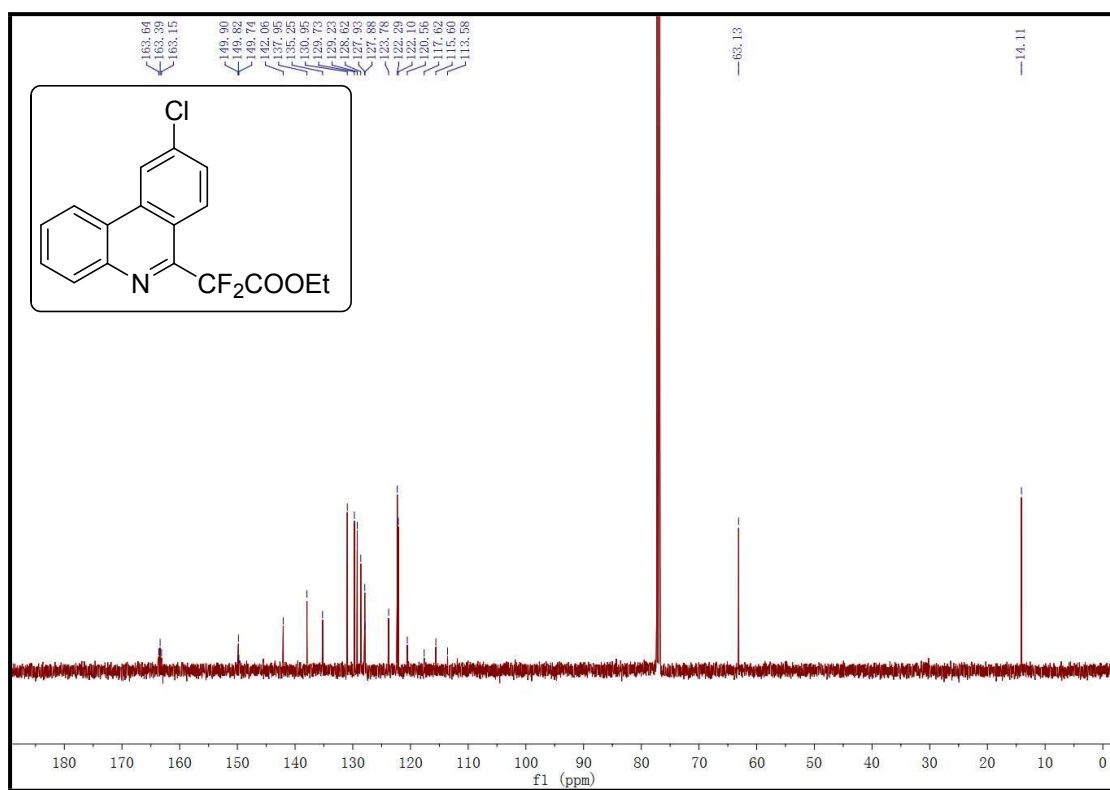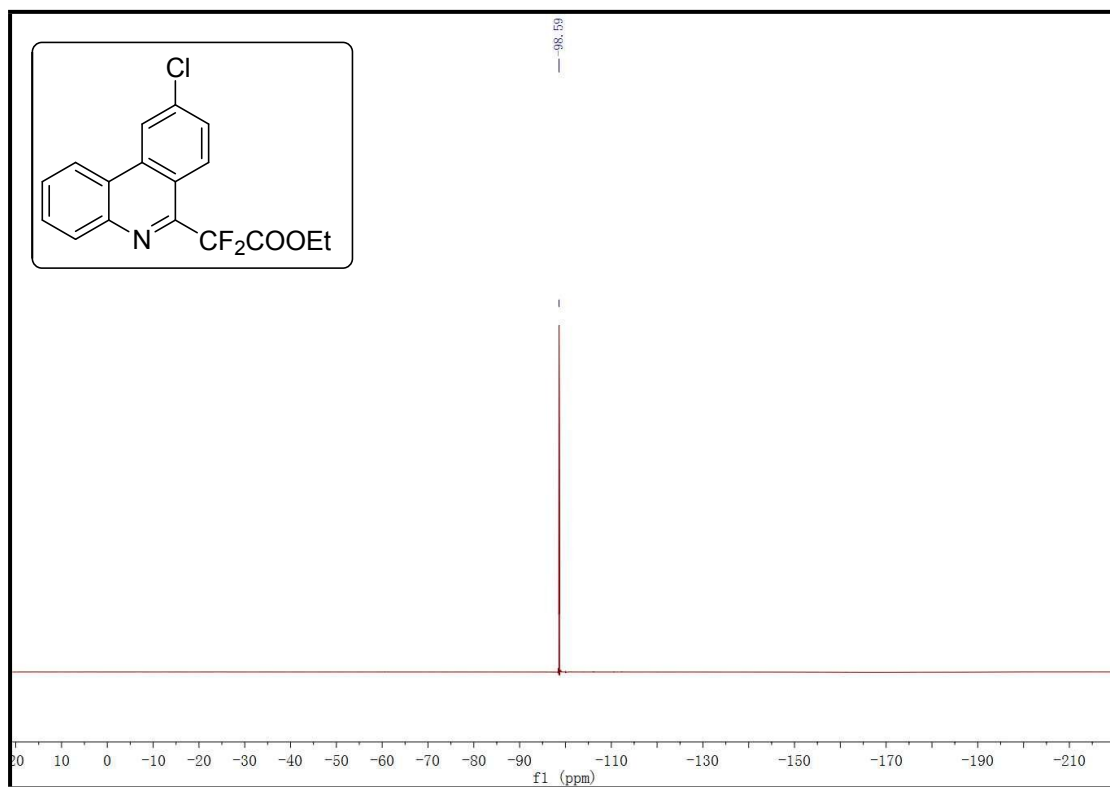

# **Ethyl 2-([1,3]dioxolo[4,5-j]phenanthridin-6-yl)-2,2-difluoroacetate (3s)**

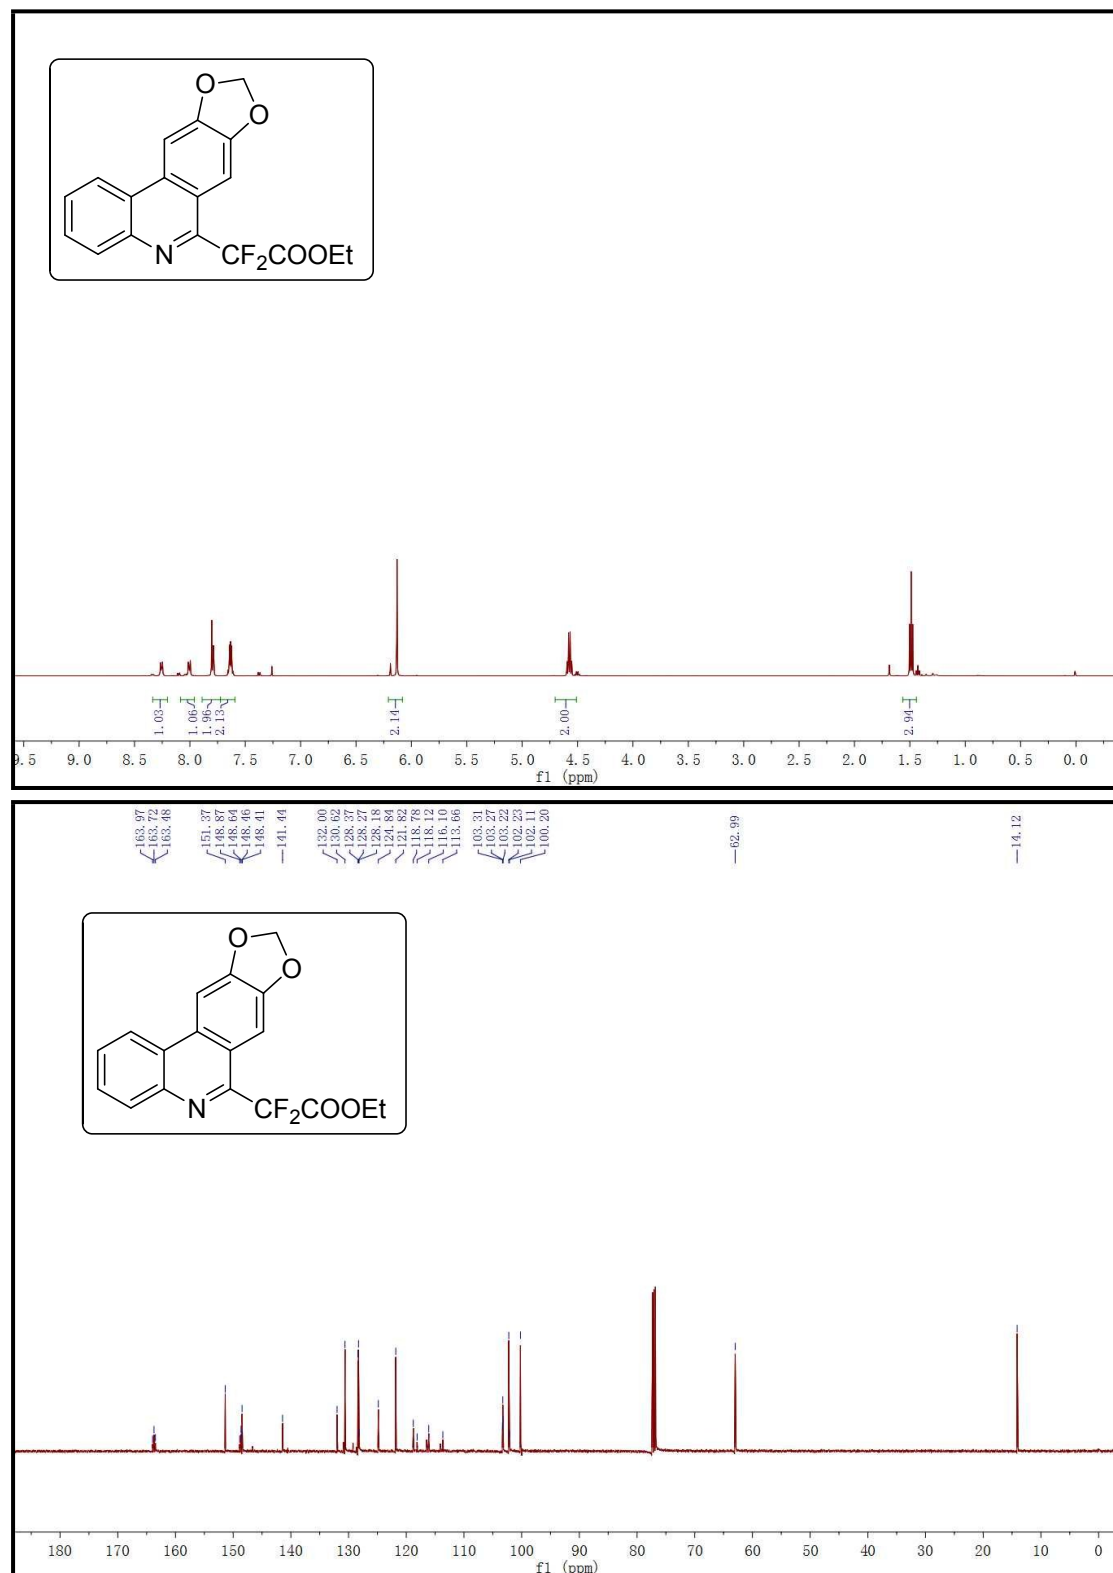

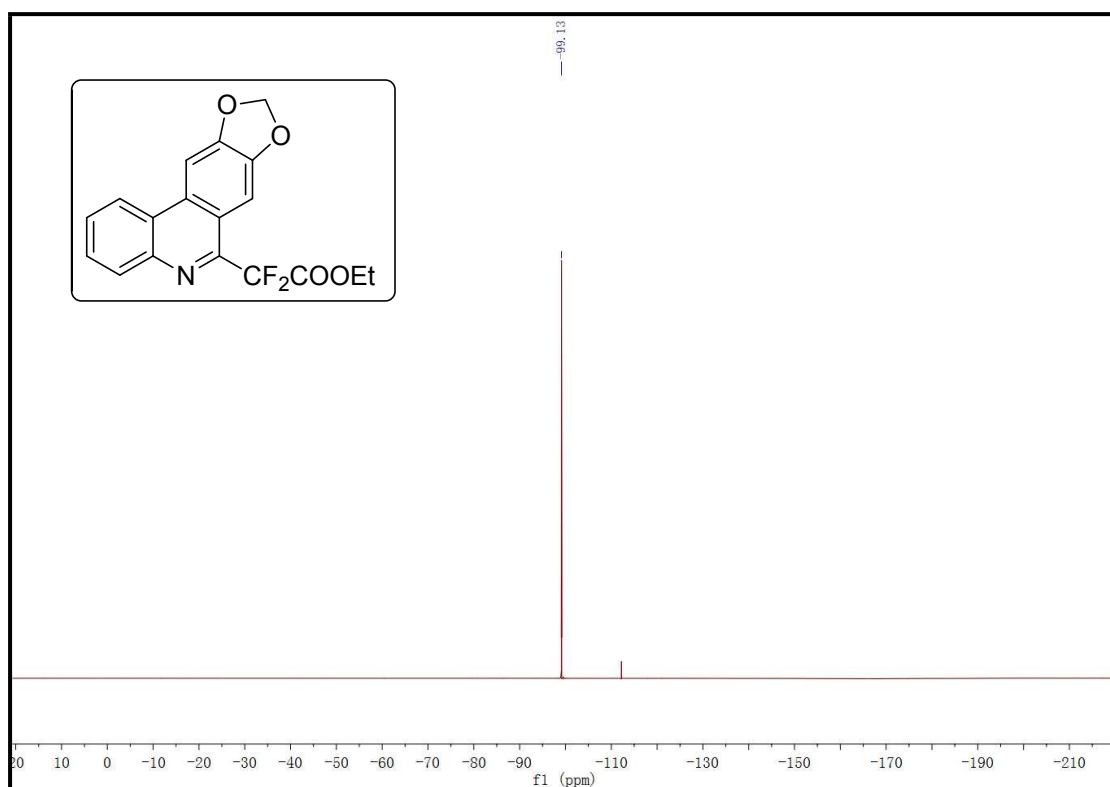

**ethyl 2,2-difluoro-2-(9-methoxyphenanthridin-6-yl)acetate (3t)**

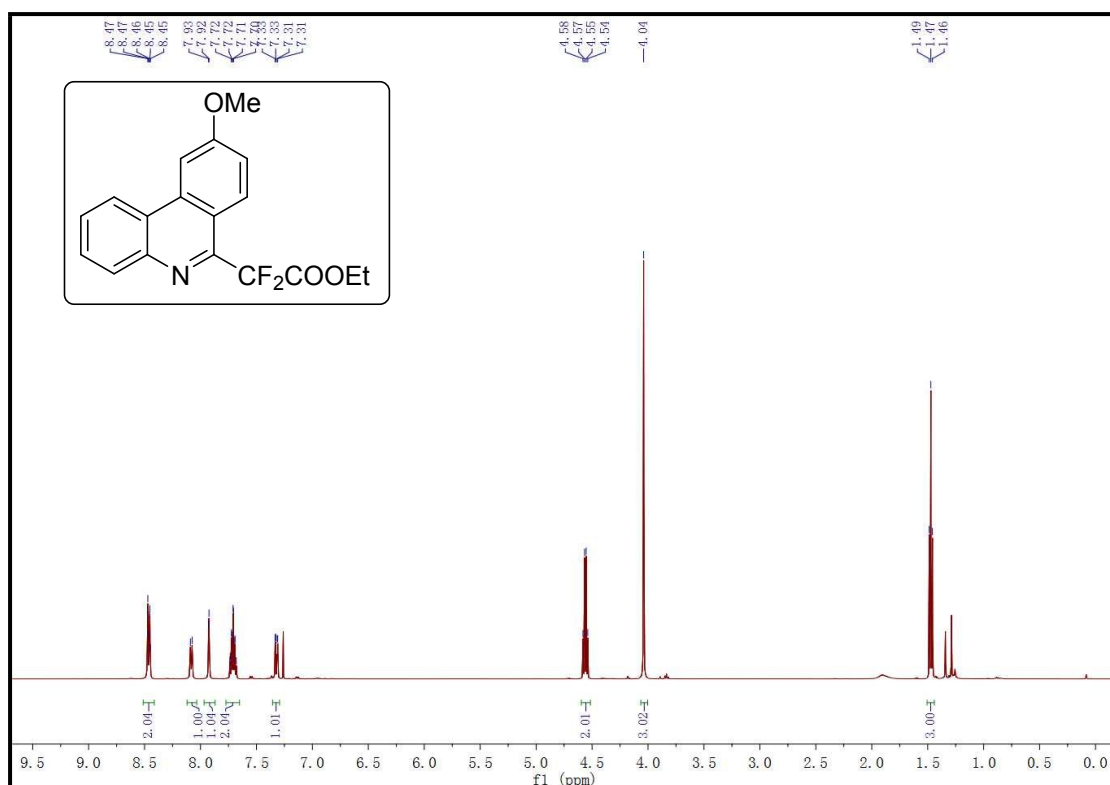

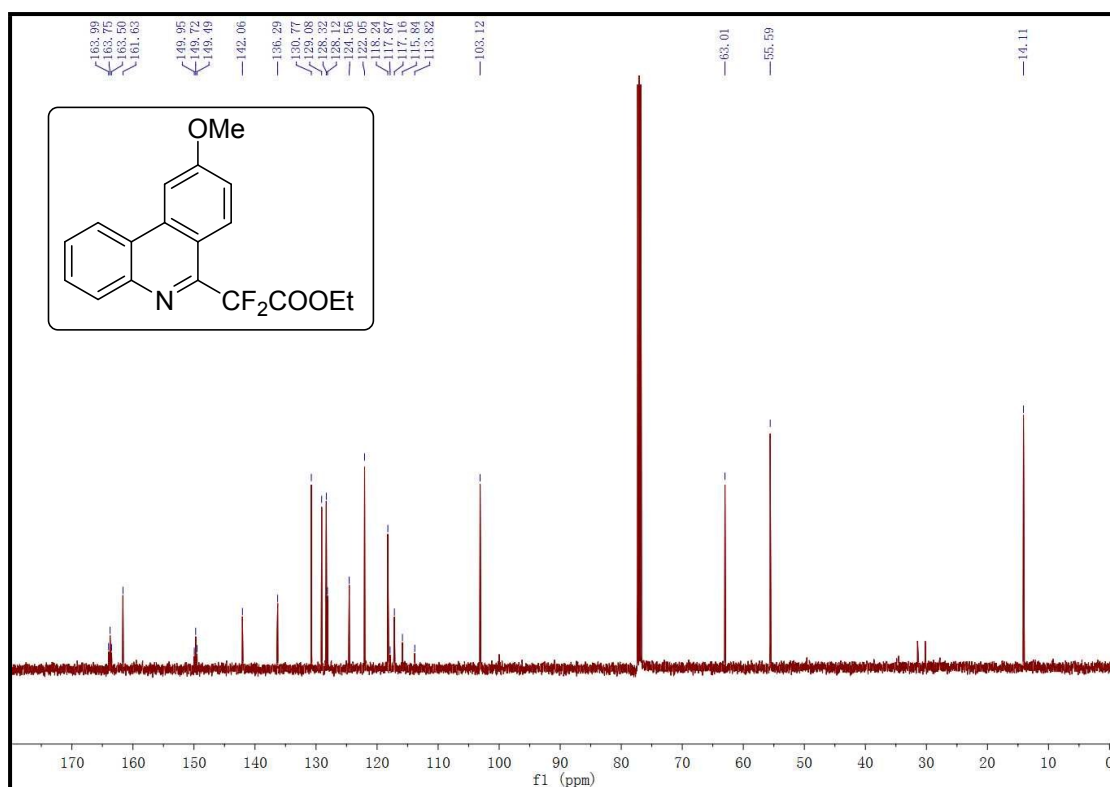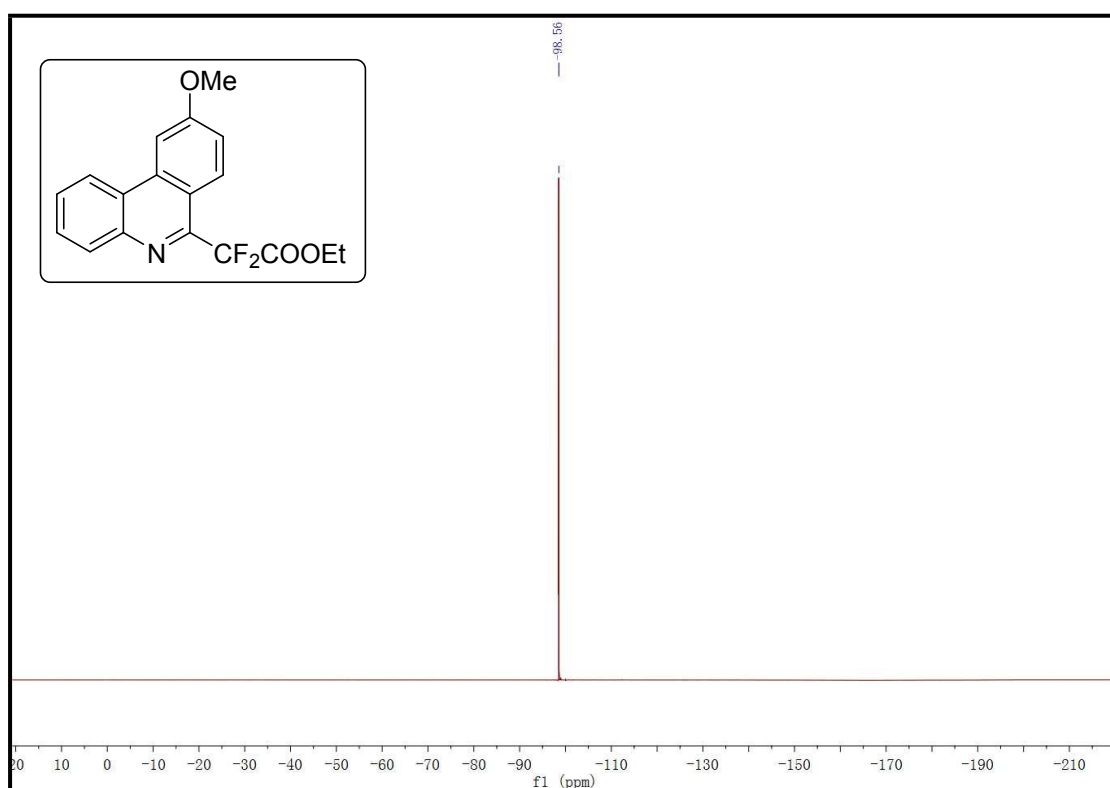



ethyl 2-(2-cyanophenanthridin-6-yl)-2,2-difluoroacetate (3u)

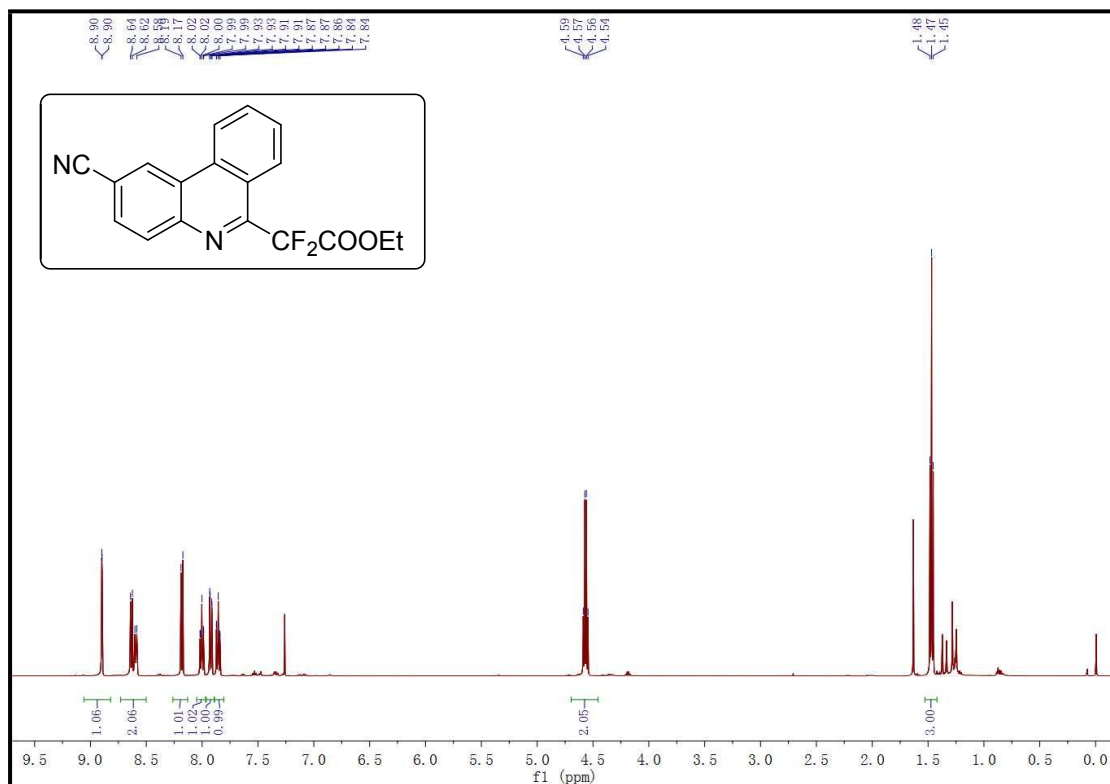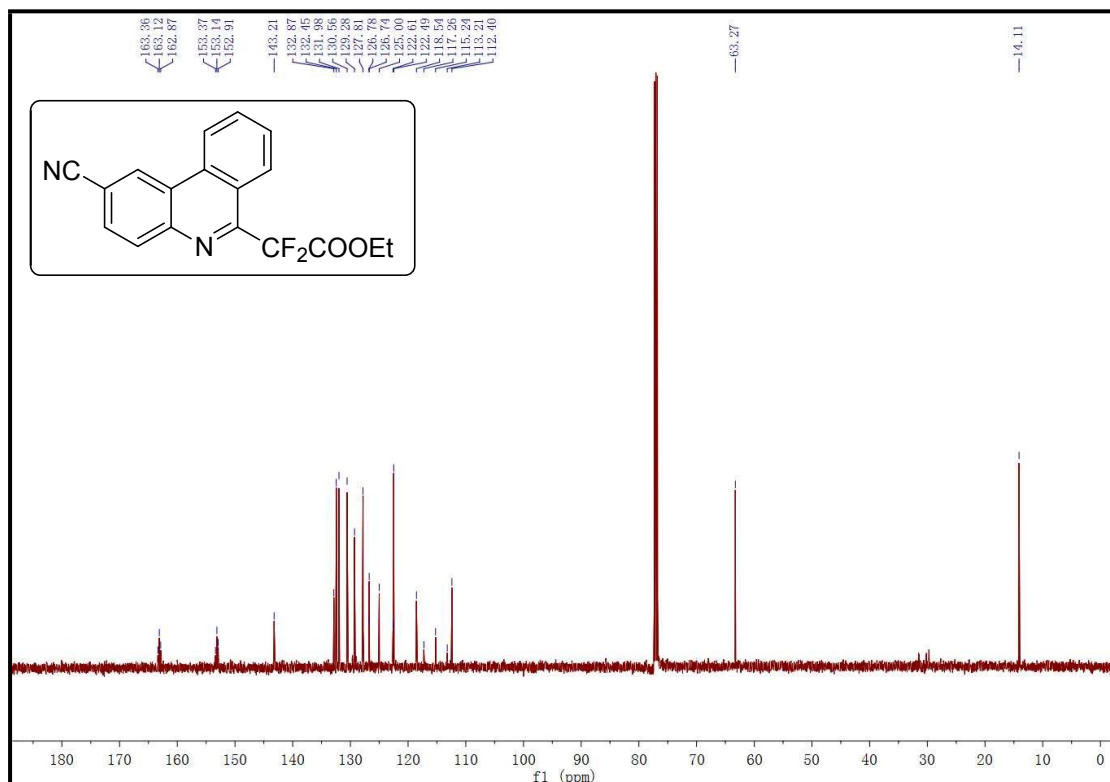

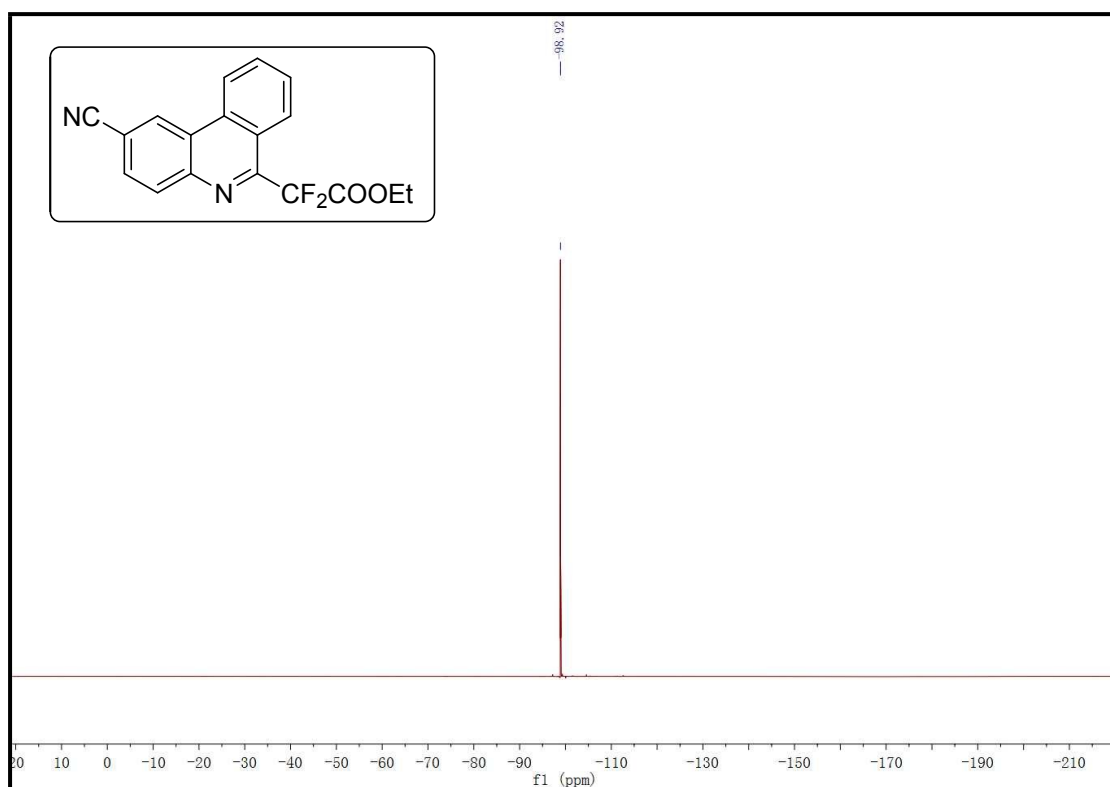

**ethyl 2,2-difluoro-2-(3-fluorophenanthridin-6-yl)acetate (3v)**

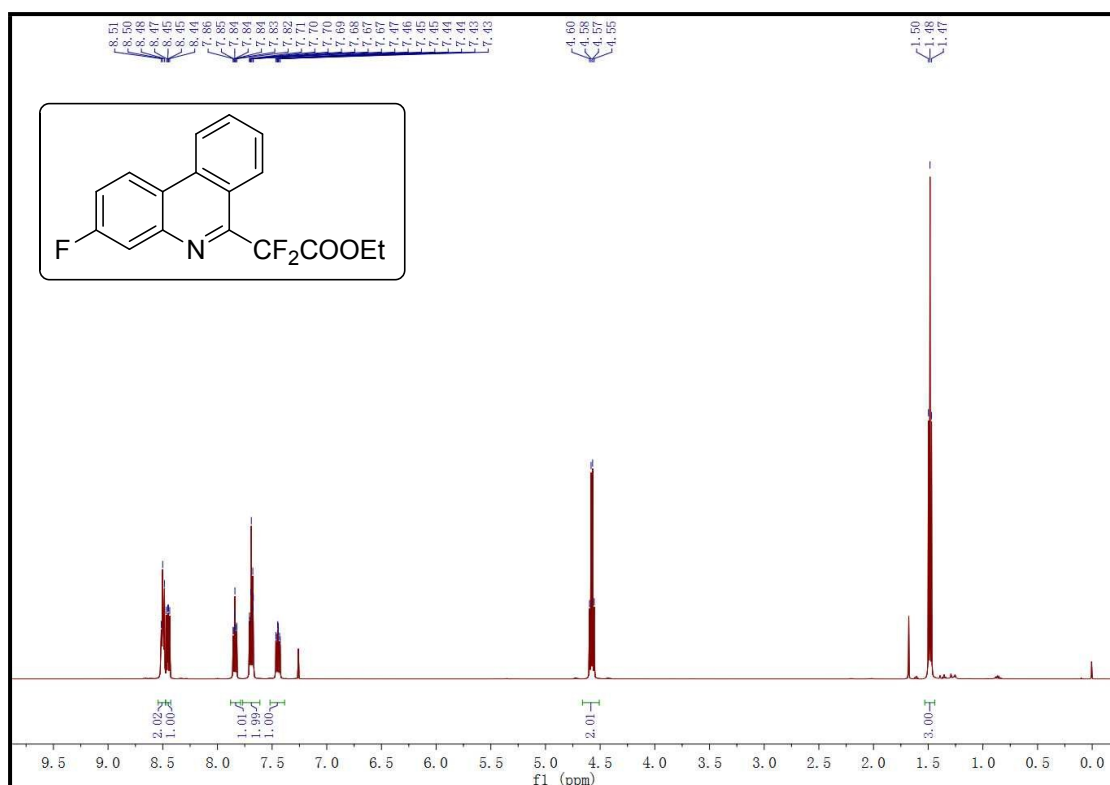

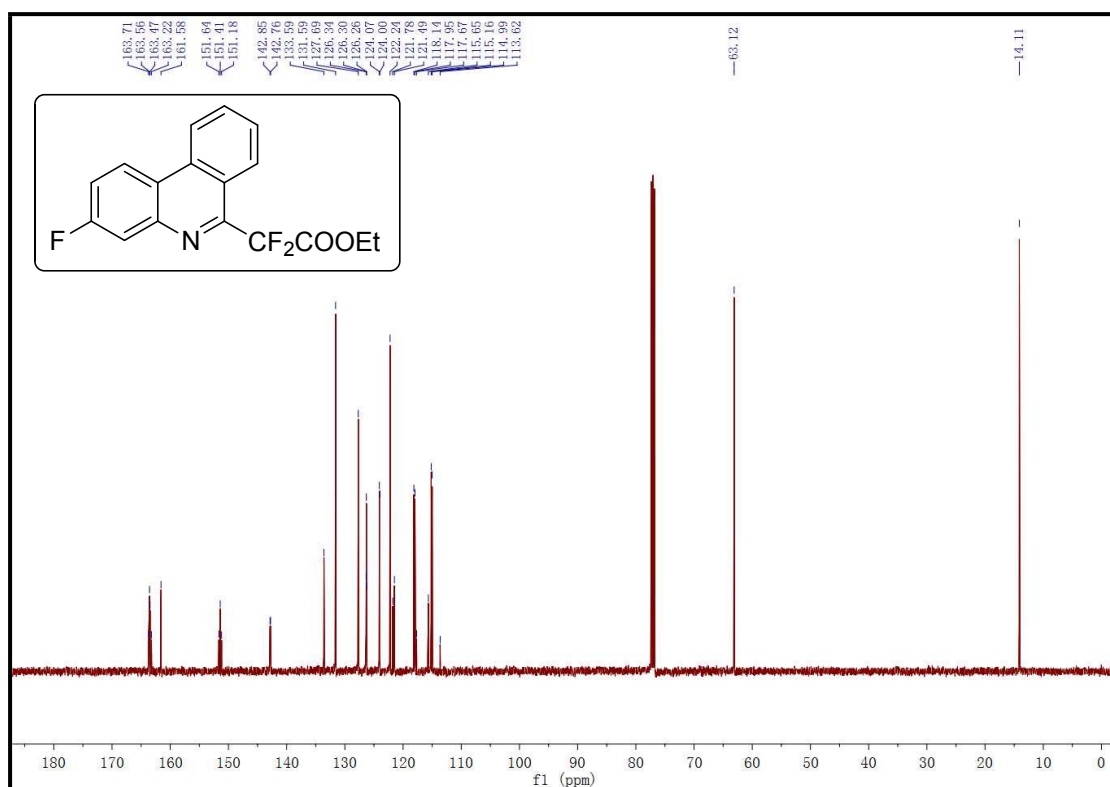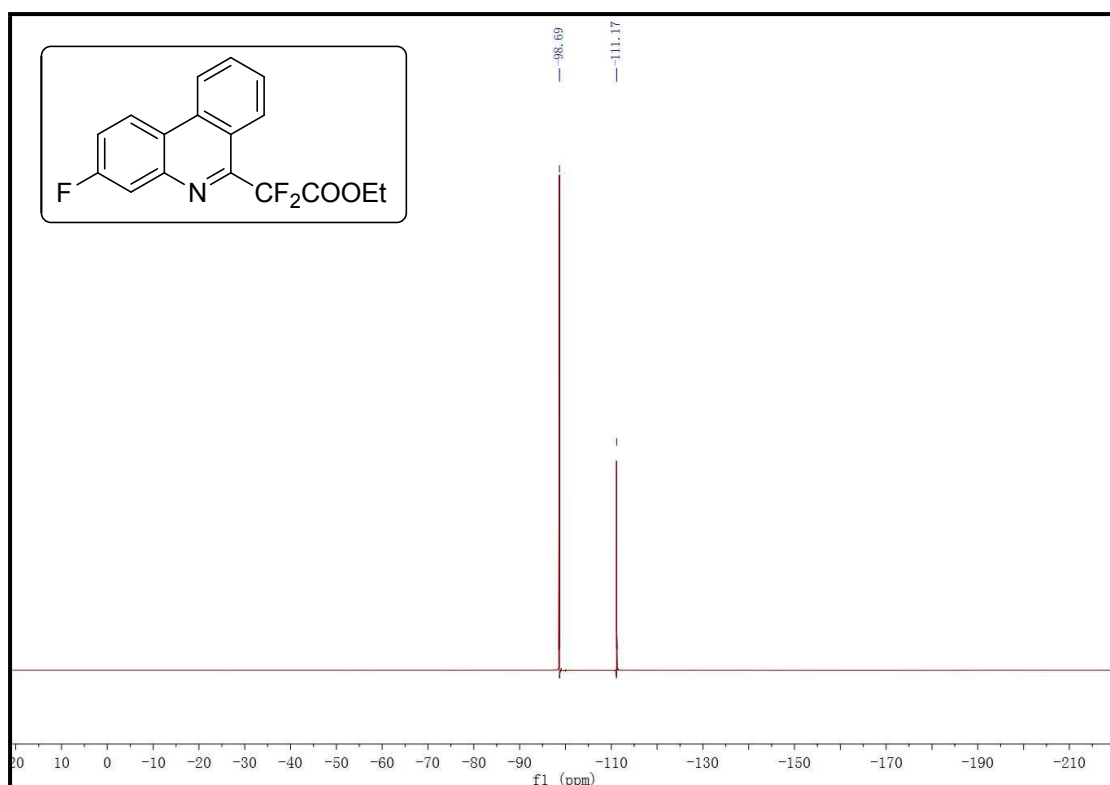

**ethyl 2,2-difluoro-2-(3-methoxyphenanthridin-6-yl)acetate (3w)**

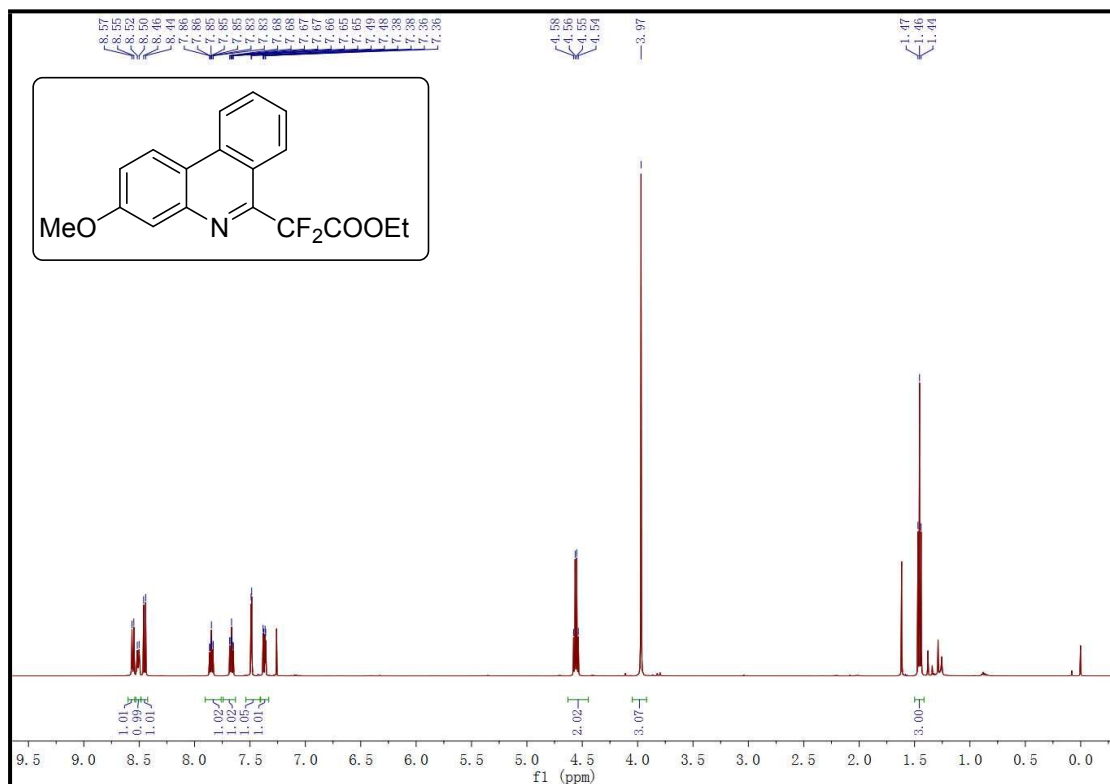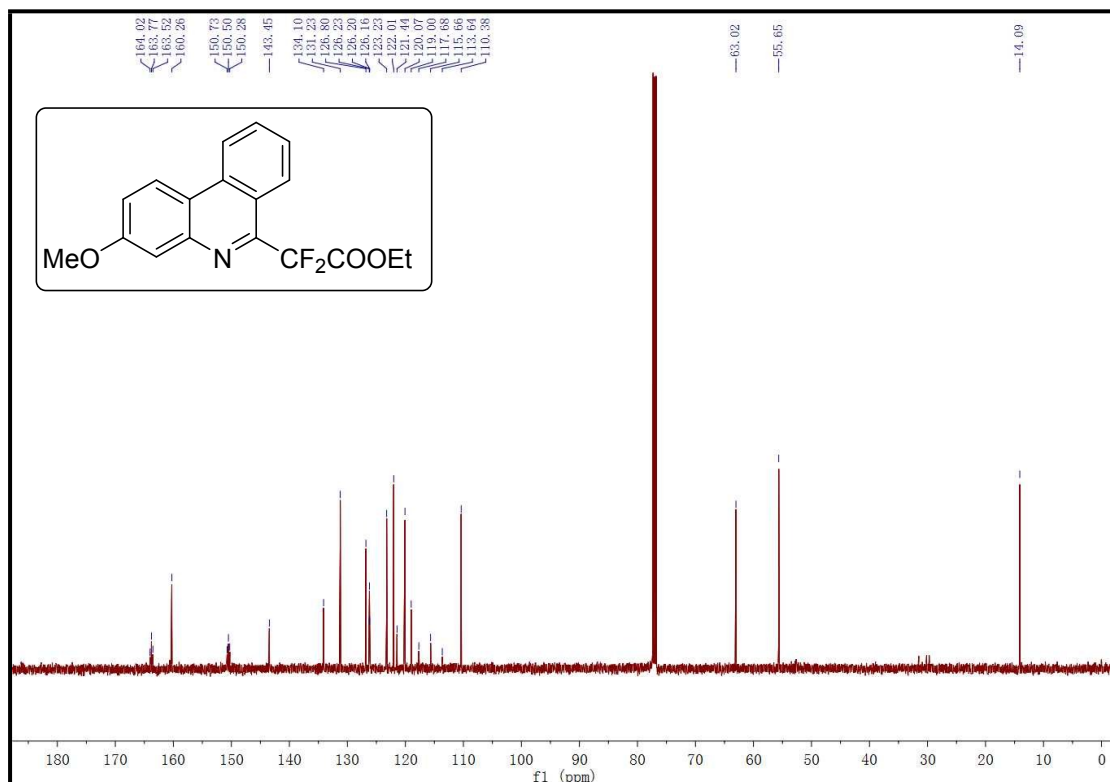

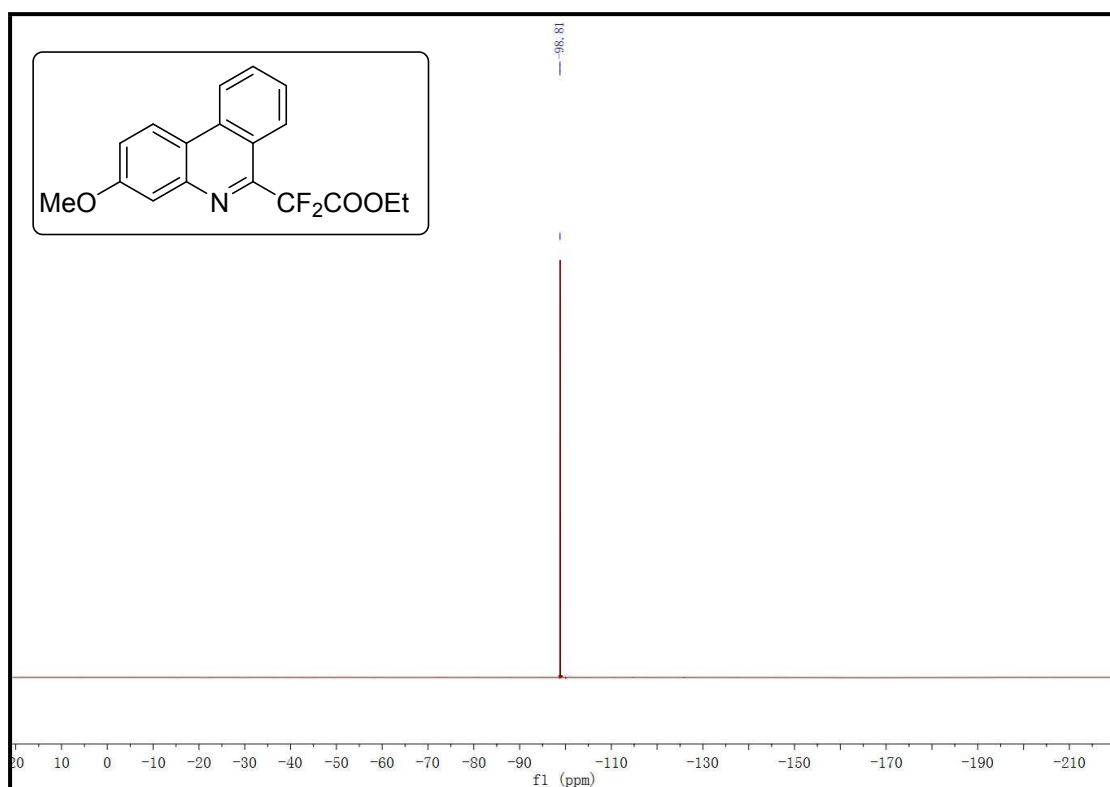

**ethyl 2,2-difluoro-2-(2-(trifluoromethyl)phenanthridin-6-yl)acetate**

**(3x)**

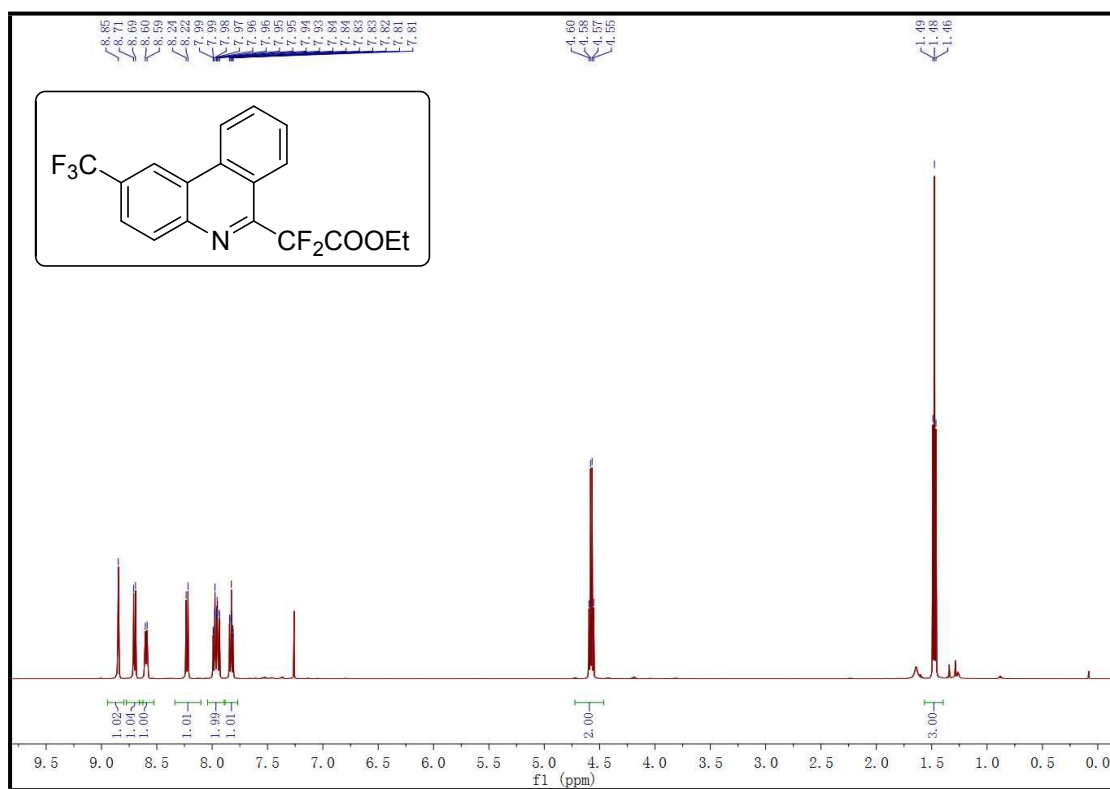

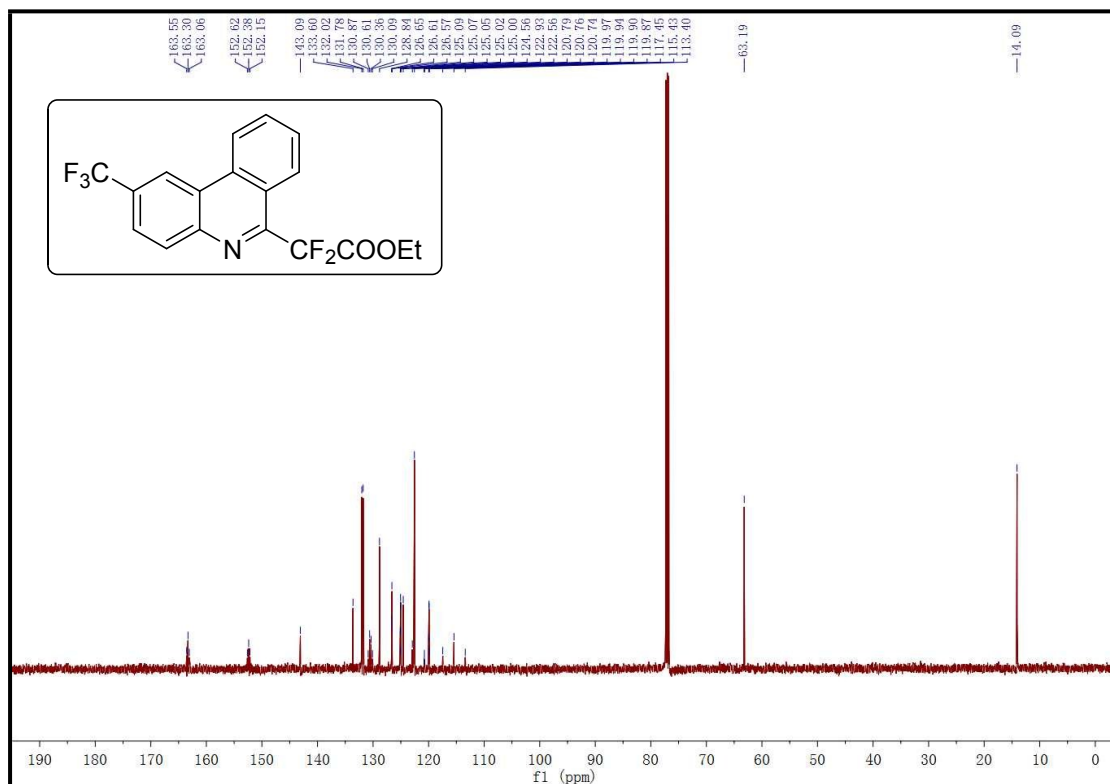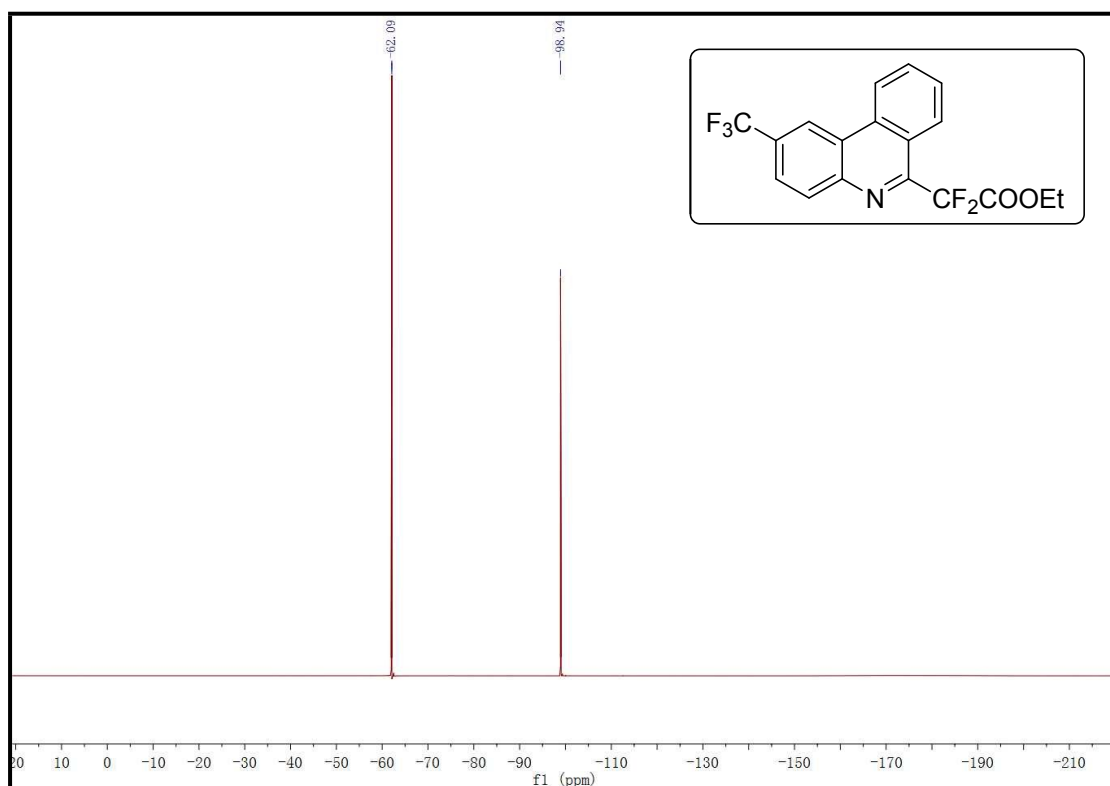

**ethyl 2,2-difluoro-2-(4-fluorophenanthridin-6-yl)acetate (3y)**

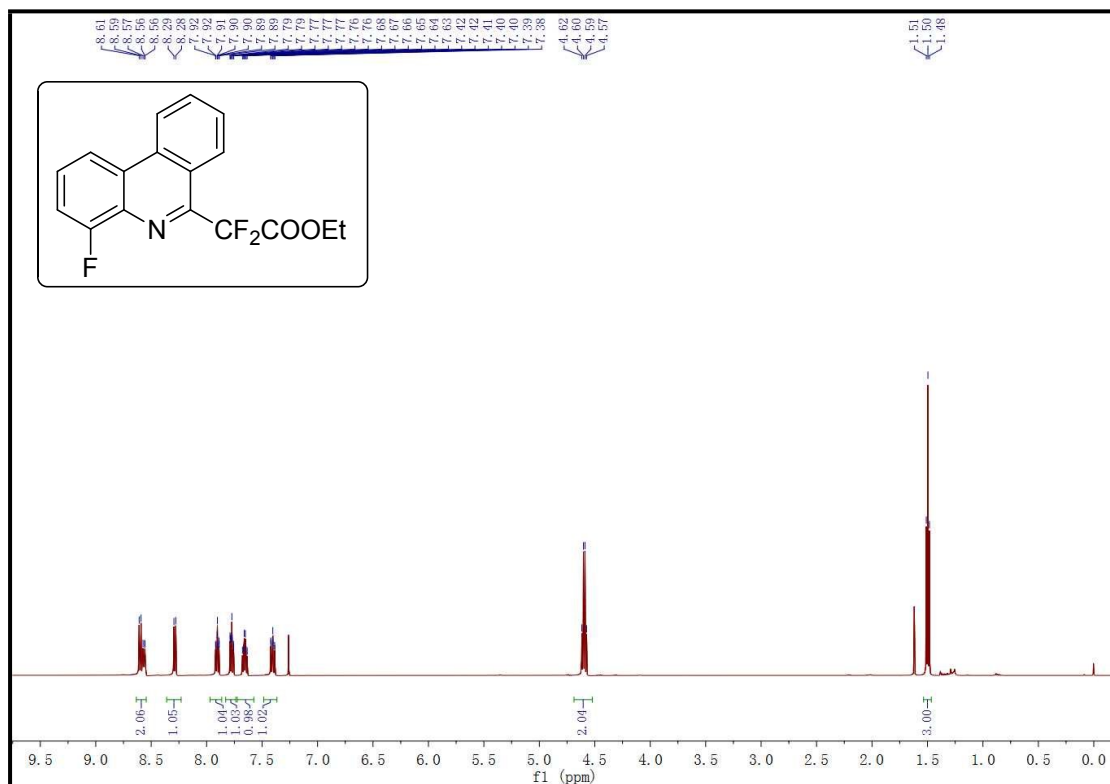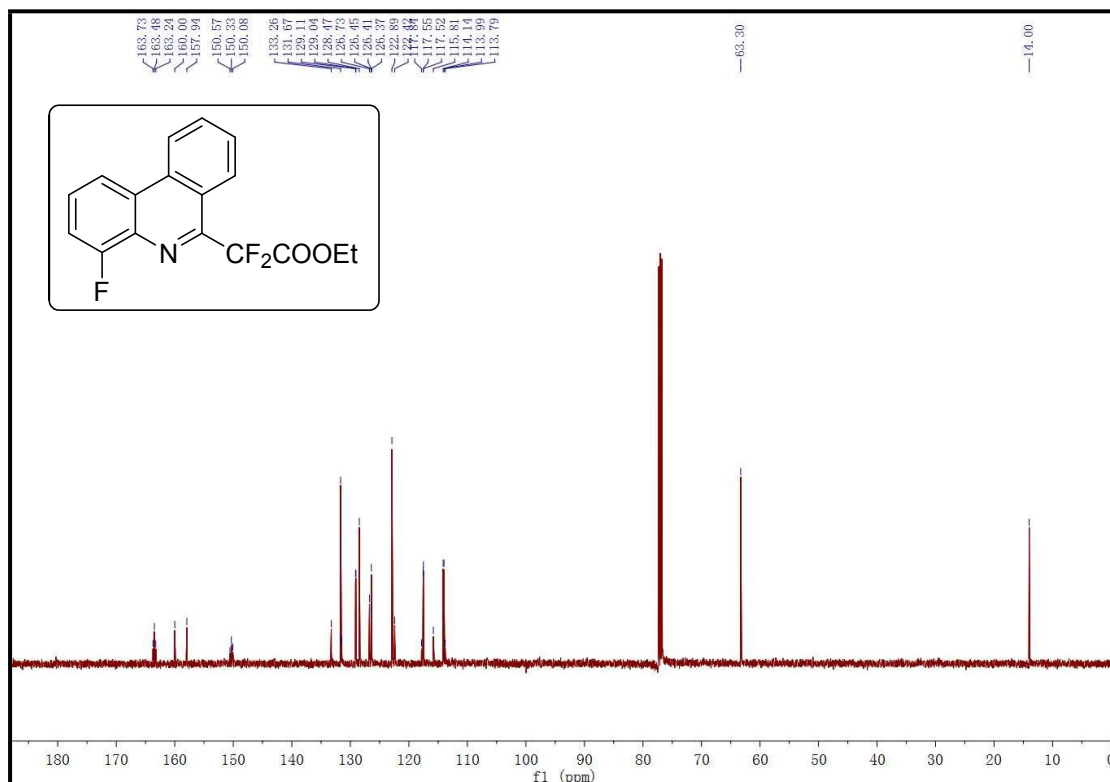





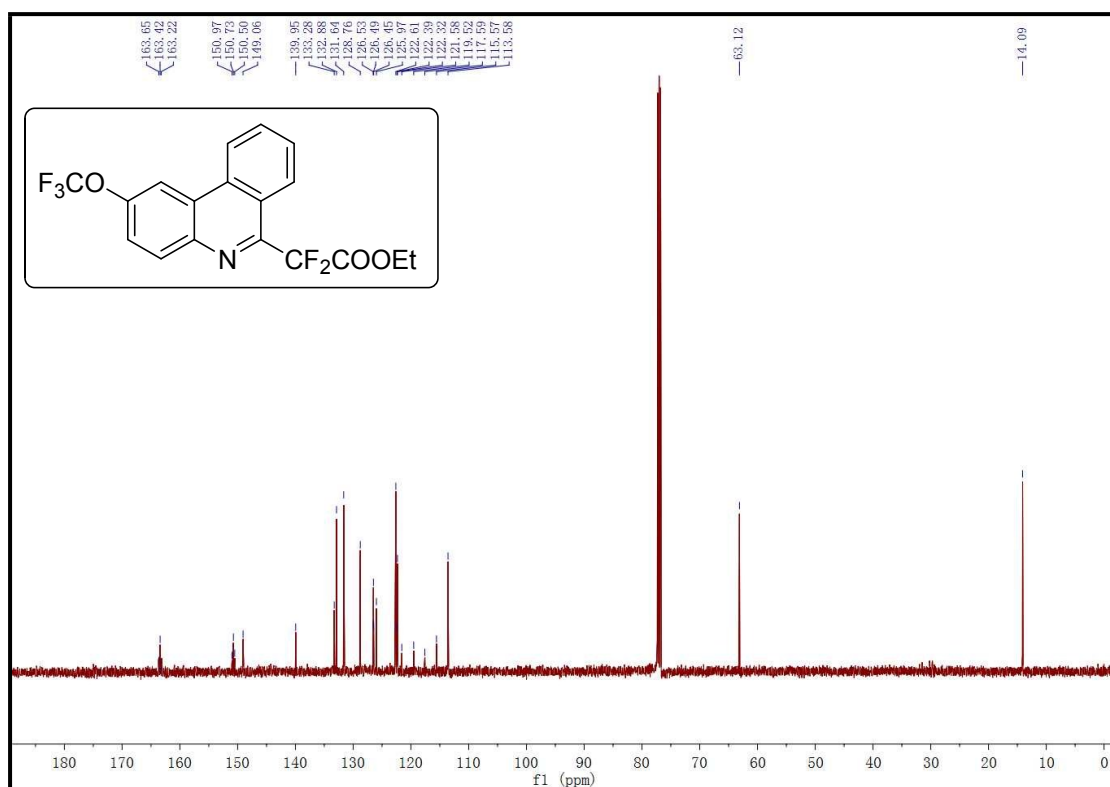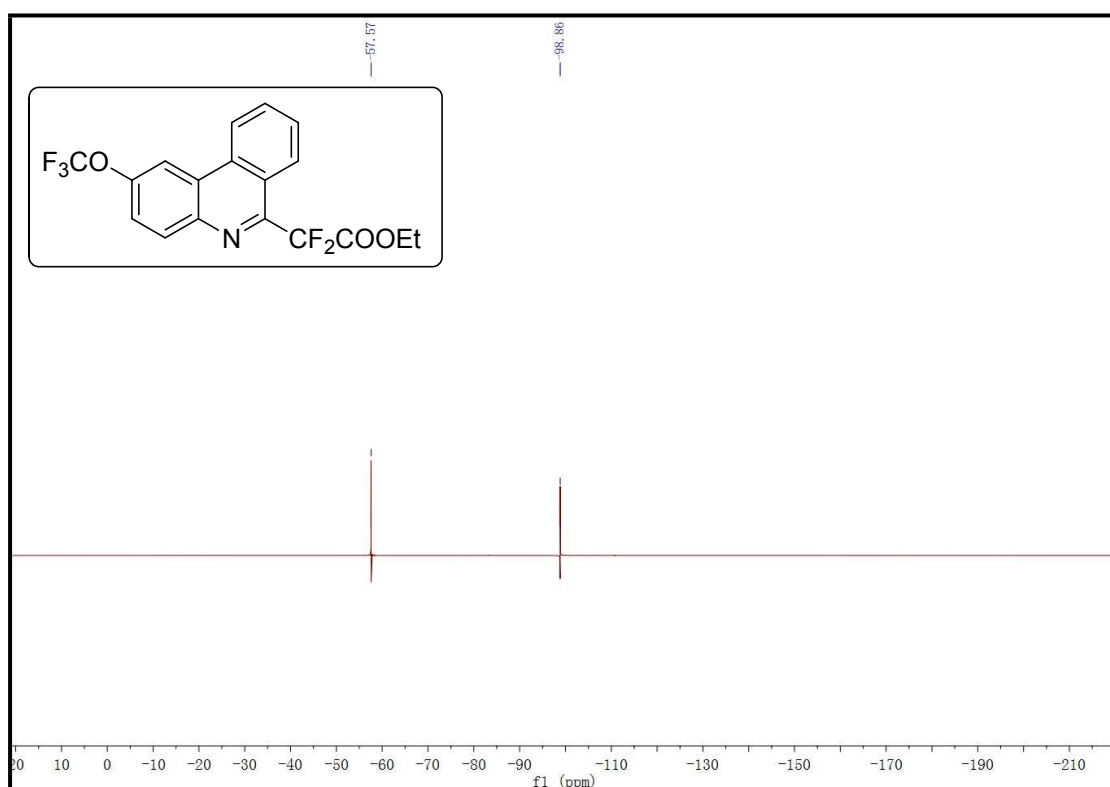

**ethyl 2-(benzo[c][1,5]naphthyridin-6-yl)-2,2-difluoroacetate (3aa)**

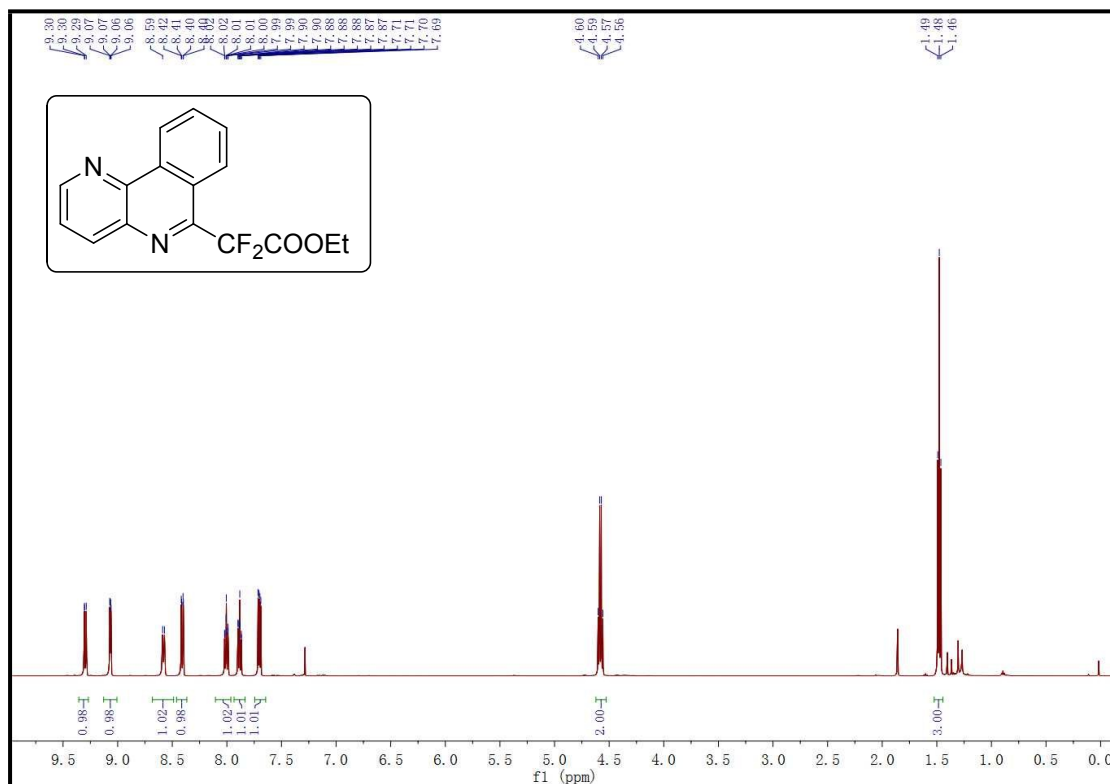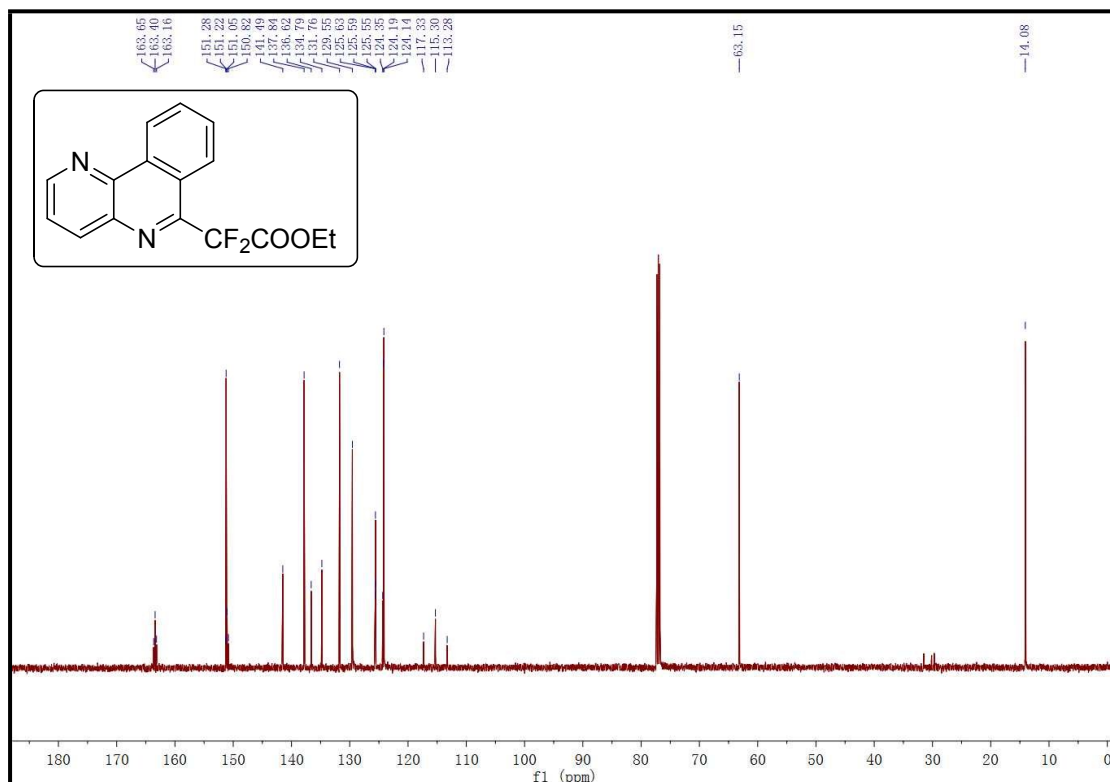

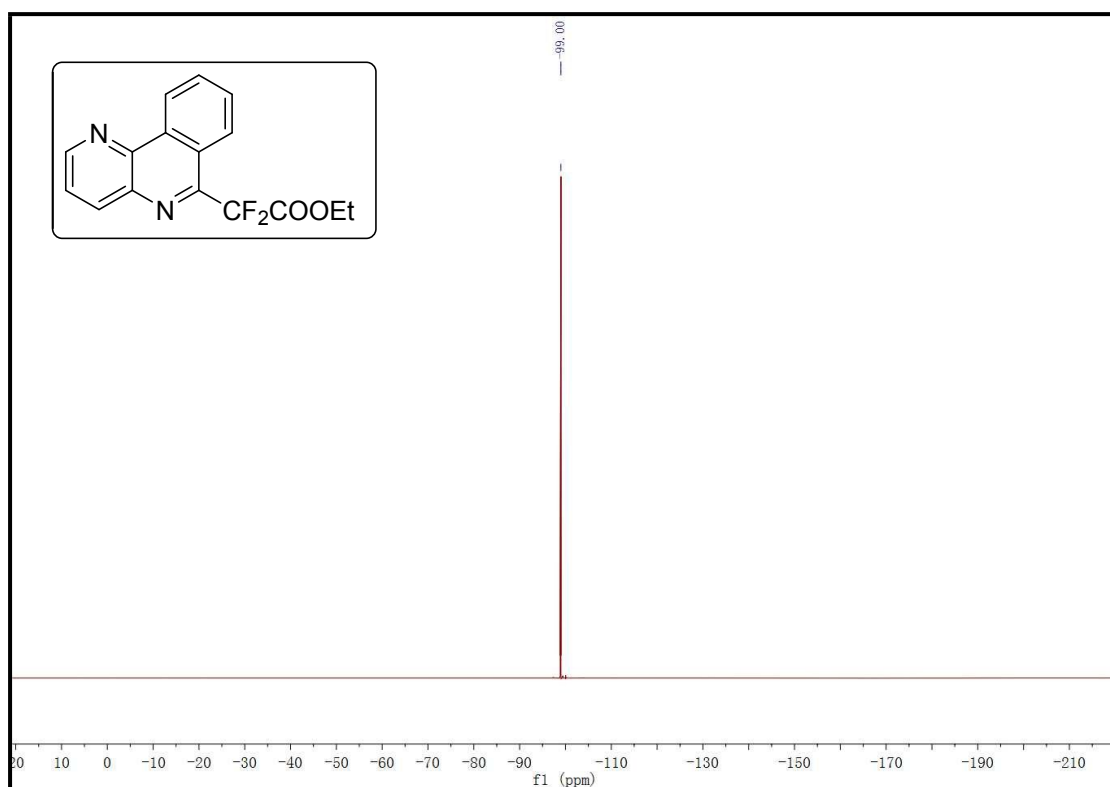

**diethyl 2,2'-(pyrrolo[1,2-a]quinoxaline-1,4-diyl)bis(2,2-difluoroacetate)**

**(3ab)**

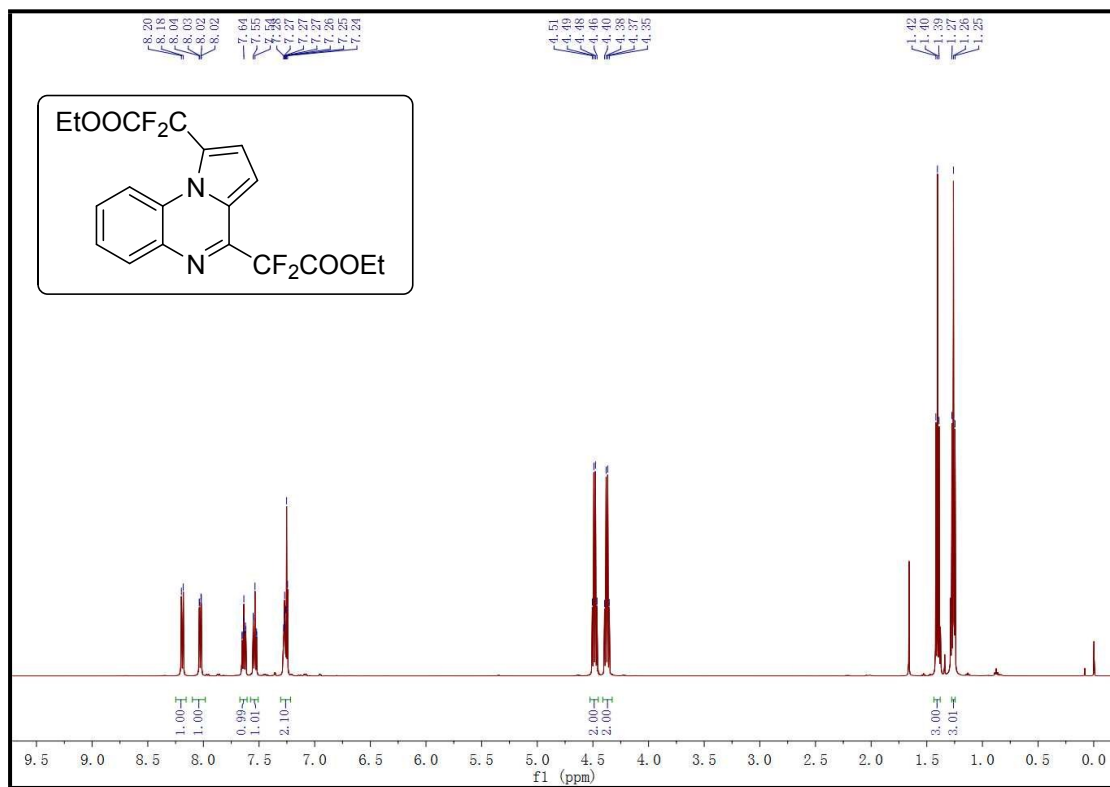

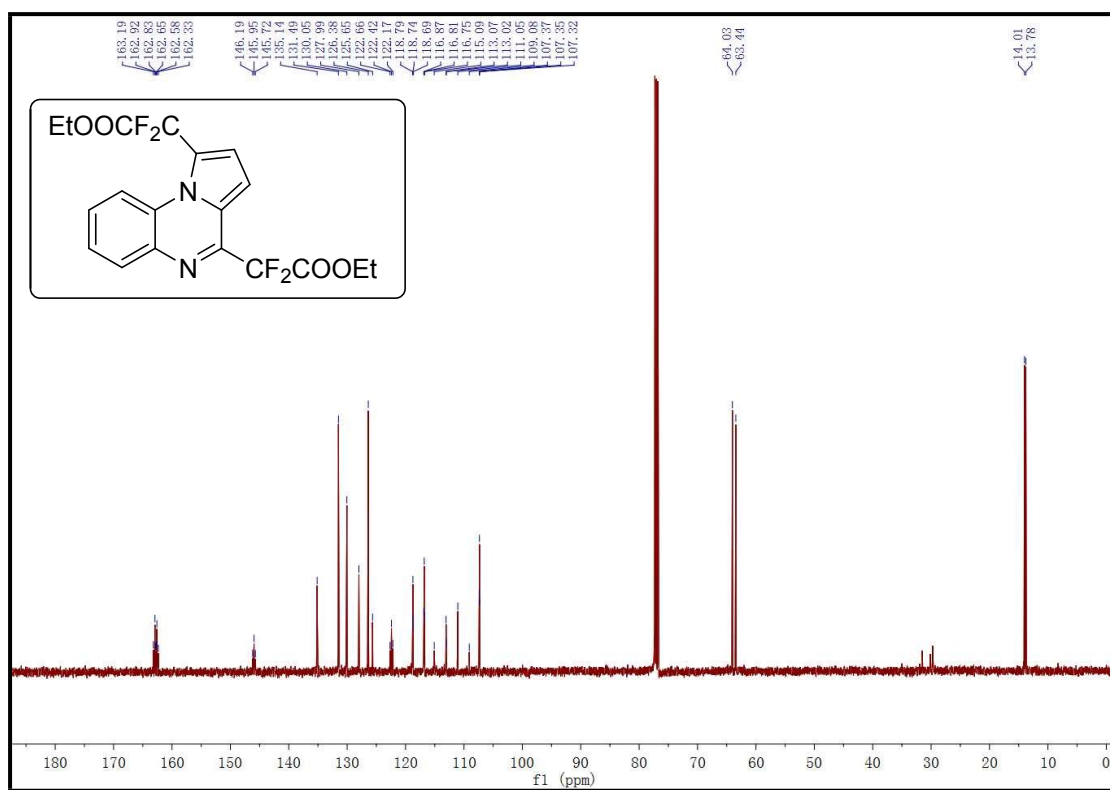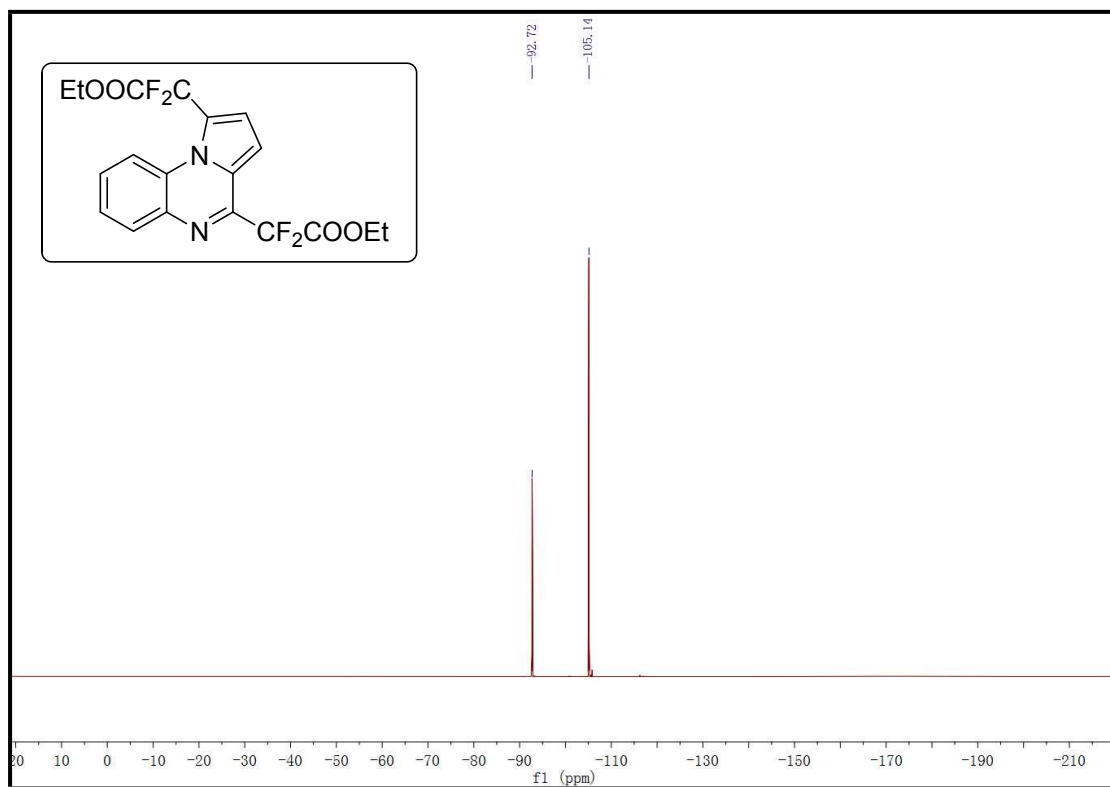

**ethyl 2-(benzo[d]thiazol-2-yl)-2,2-difluoroacetate (5a)**

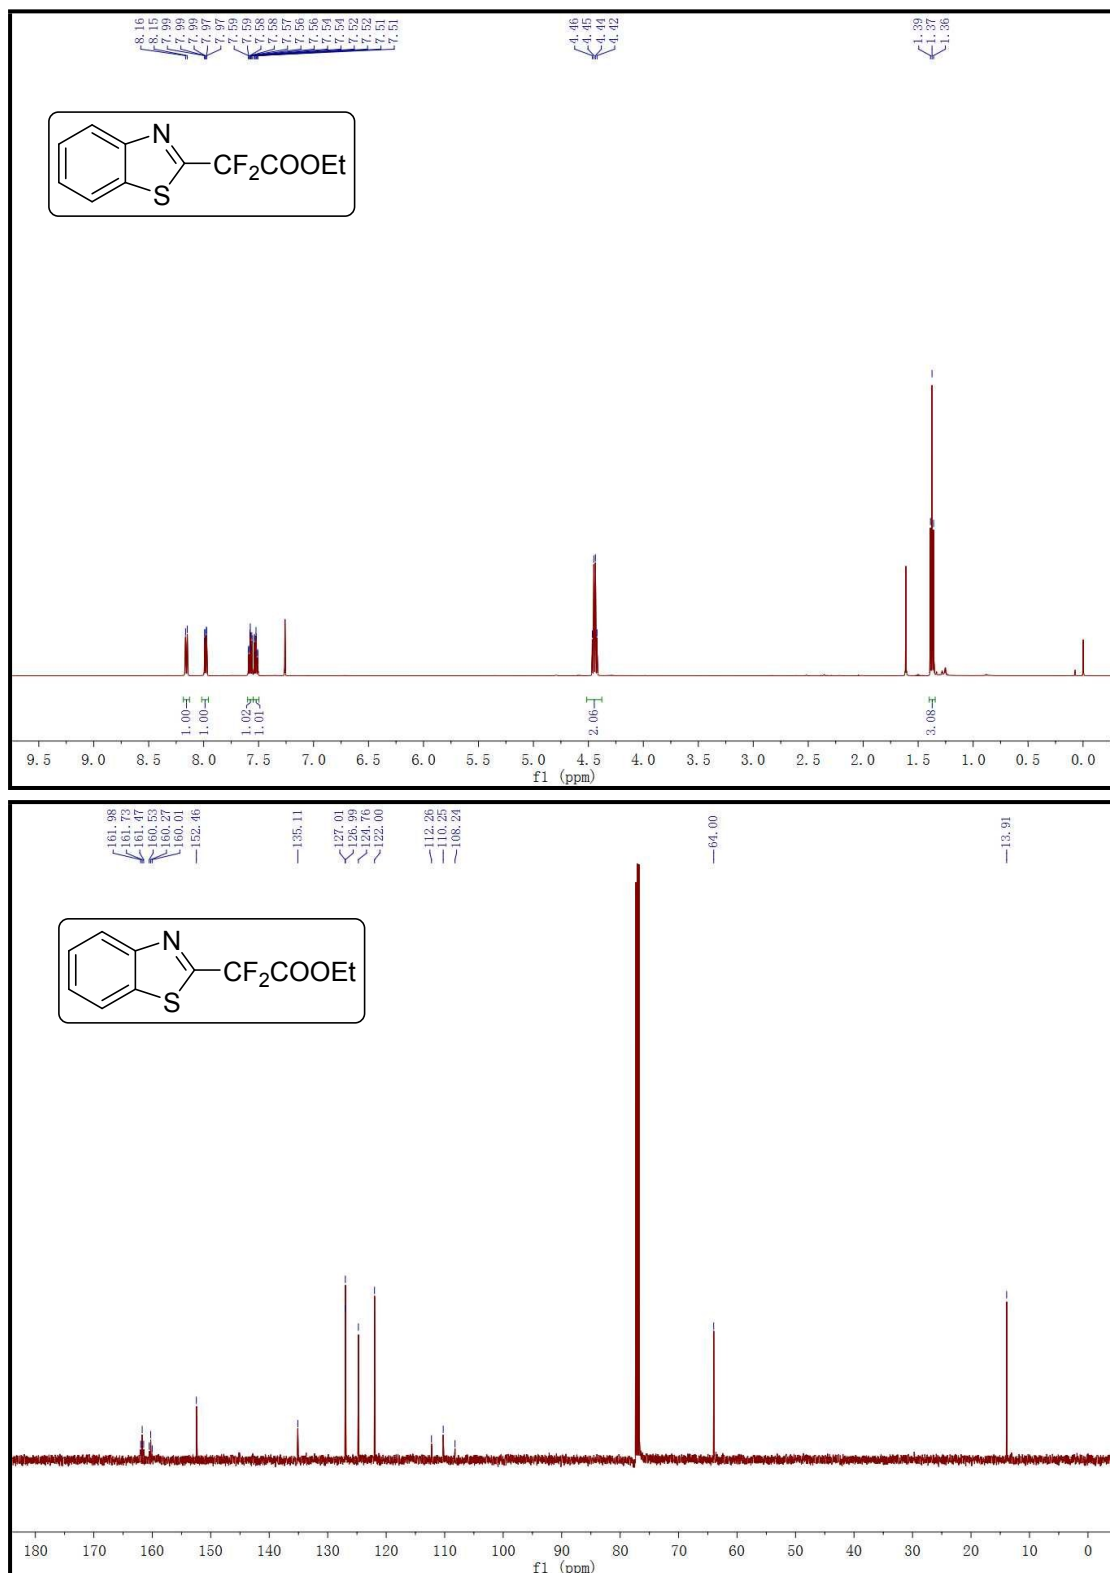

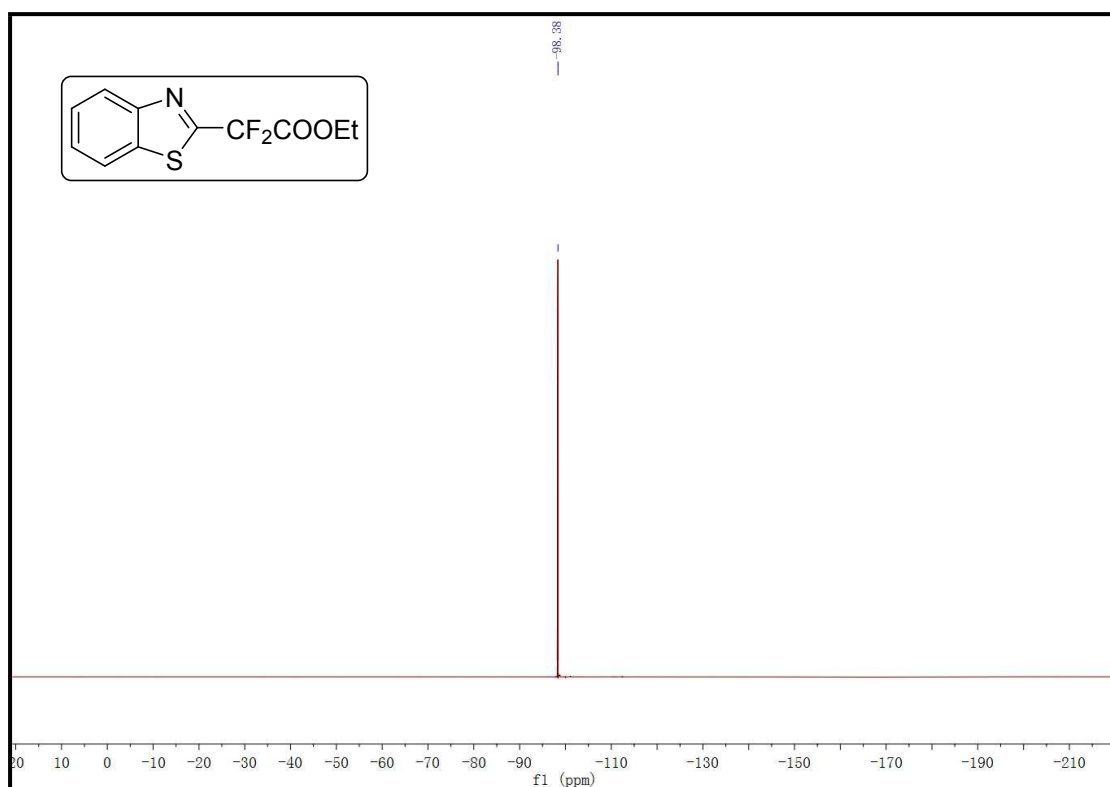

**ethyl 2,2-difluoro-2-(5-methoxybenzo[*d*]thiazol-2-yl)acetate (5b)**

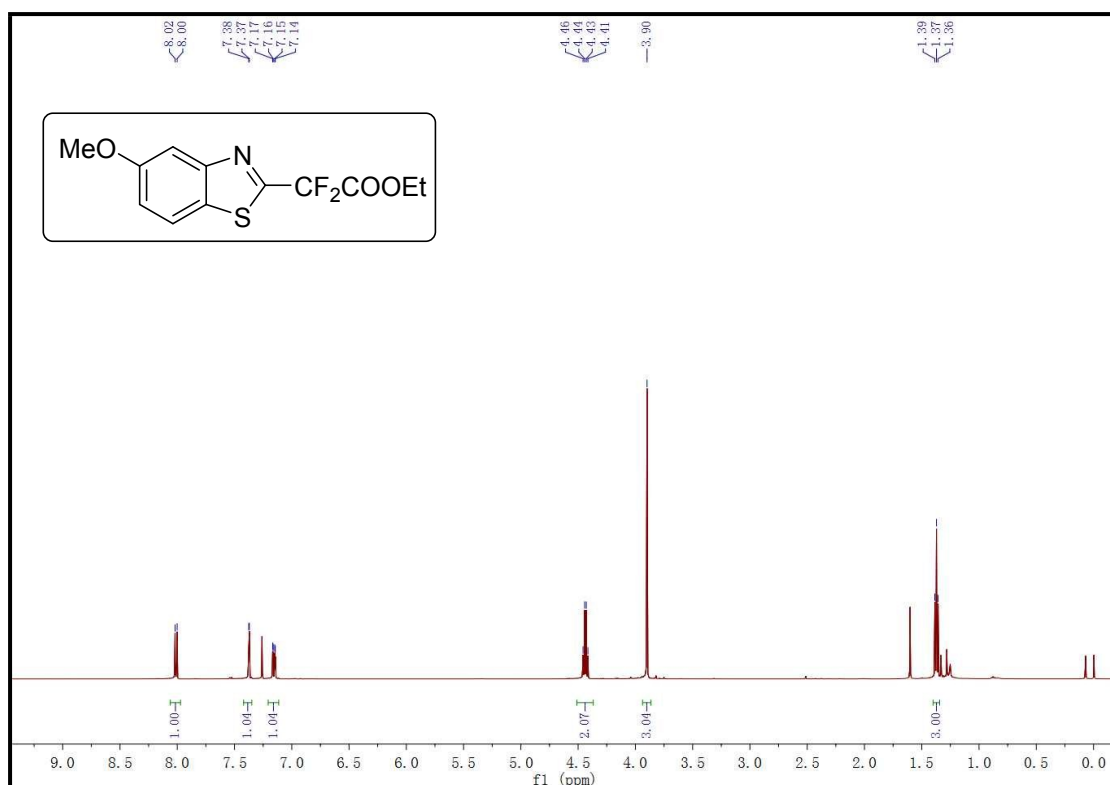

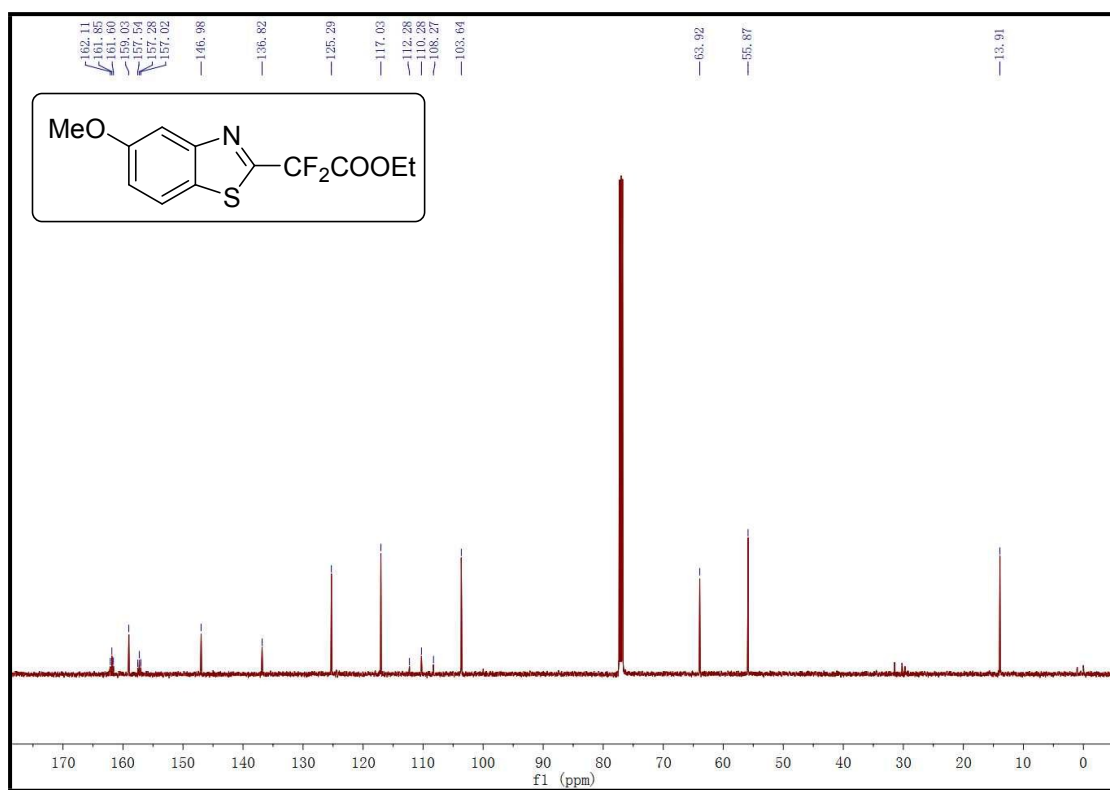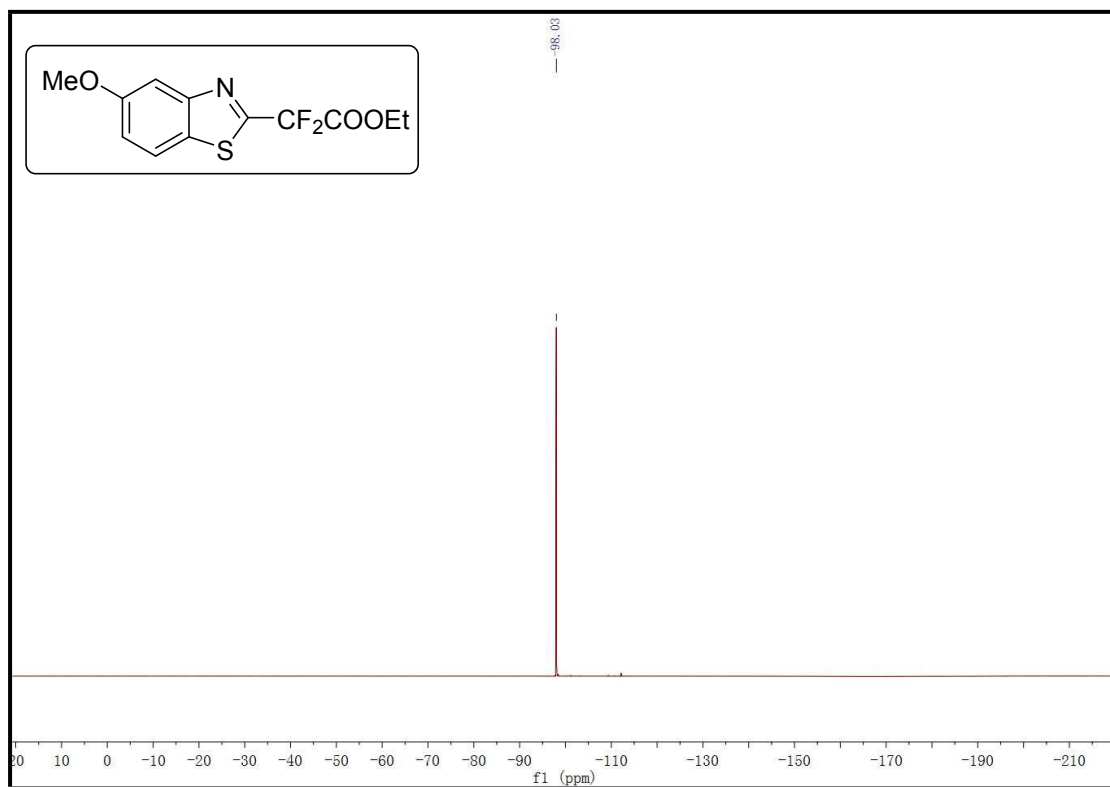

**ethyl 2-(5-ethoxybenzo[d]thiazol-2-yl)-2,2-difluoroacetate (5c)**

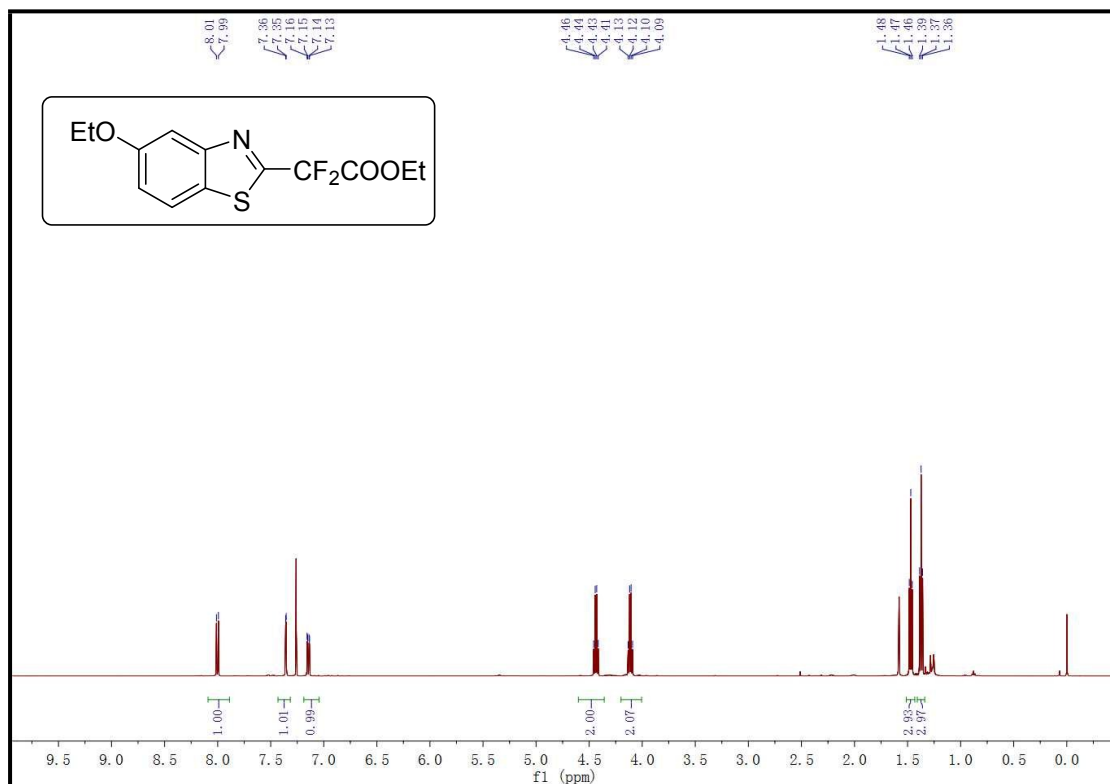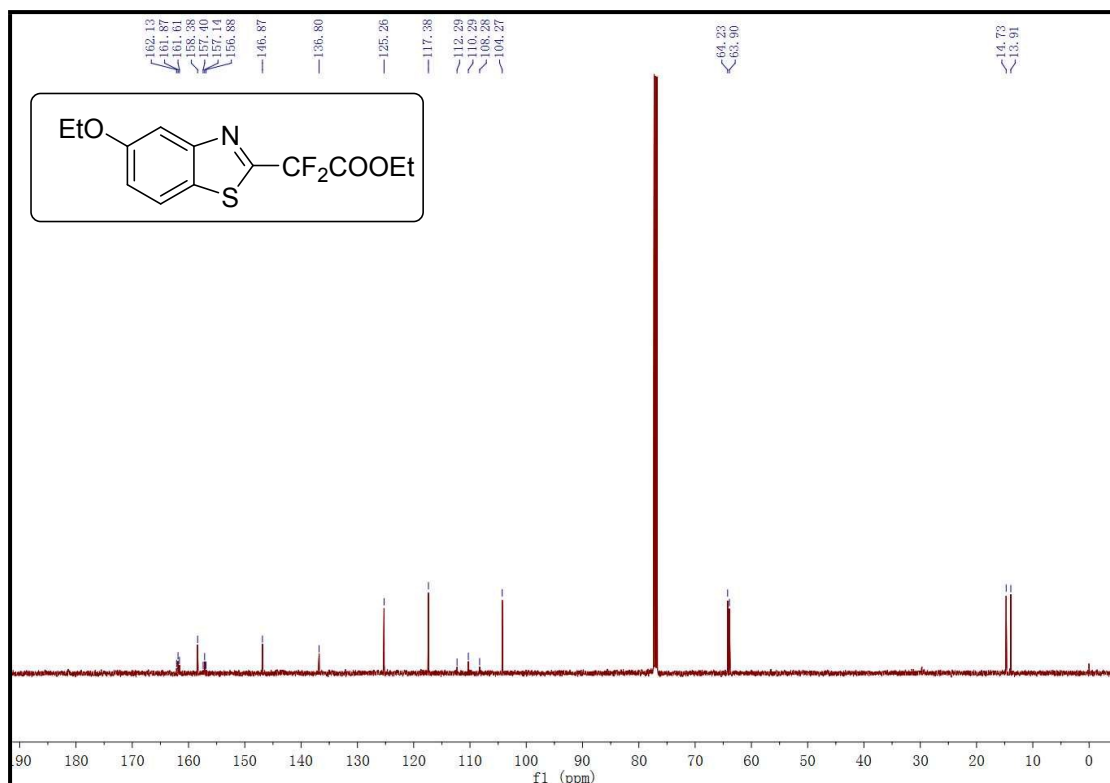



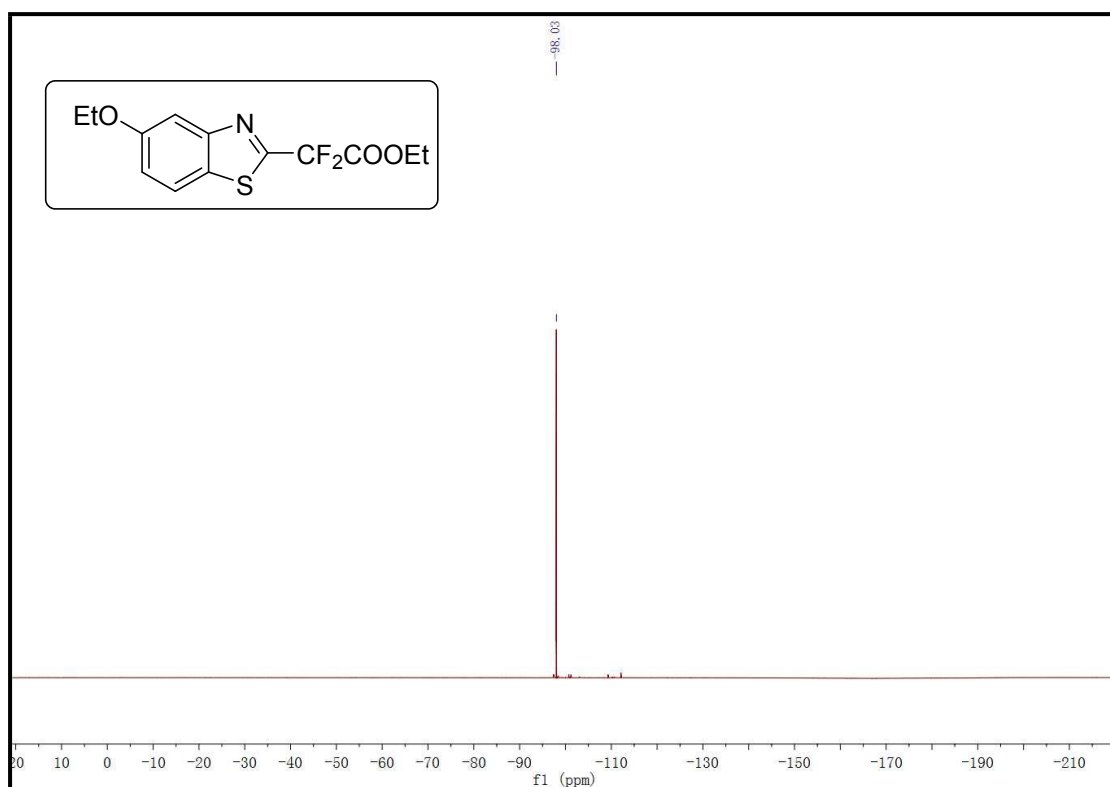

**ethyl 2,2-difluoro-2-(5-(trifluoromethoxy)benzo[*d*]thiazol-2-yl)acetate**  
**(5d)**

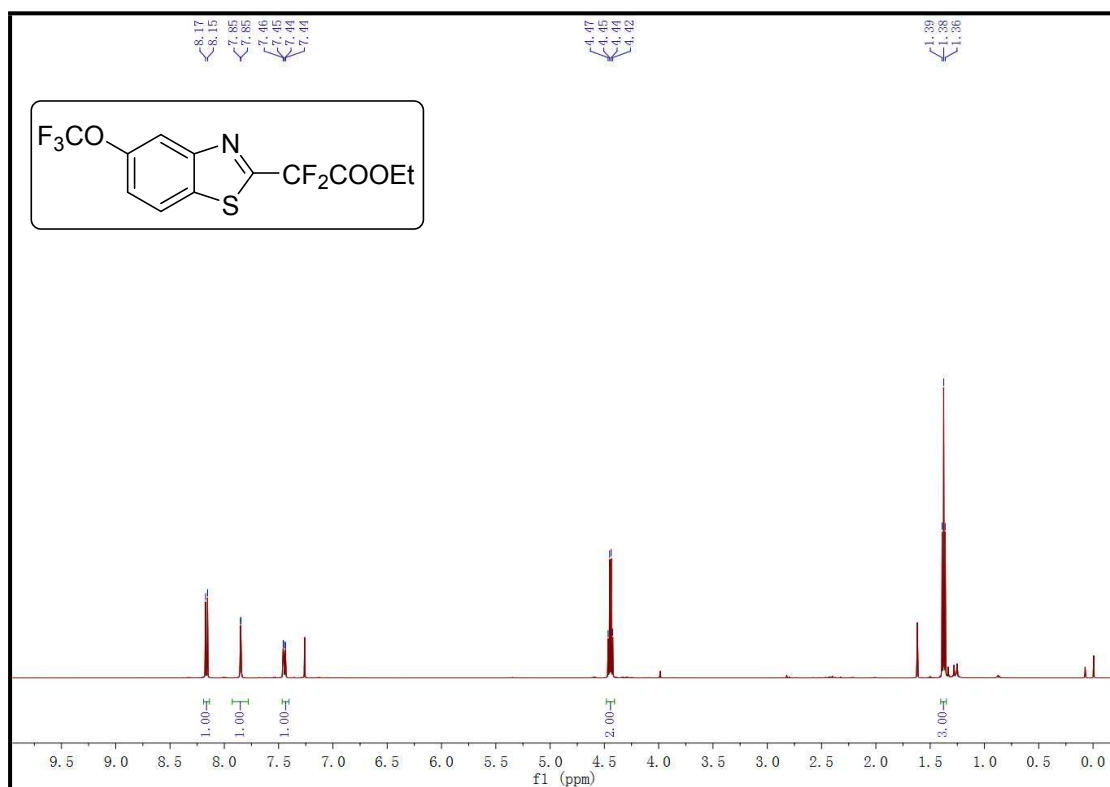

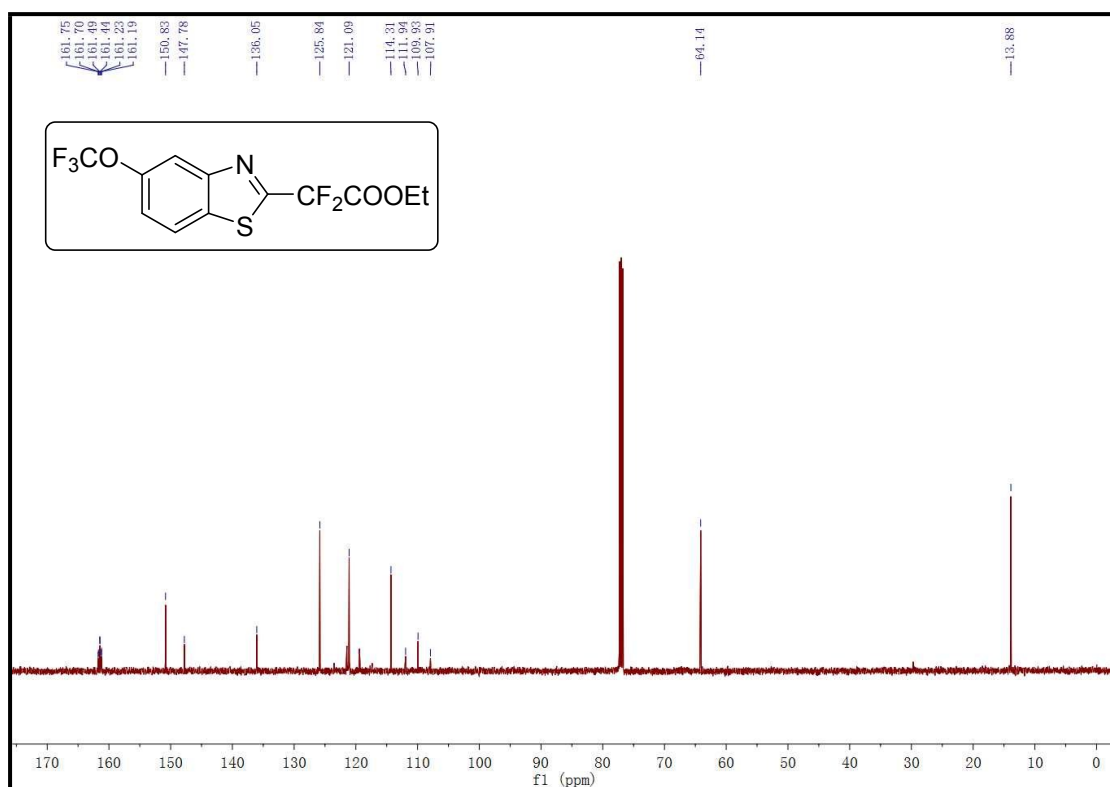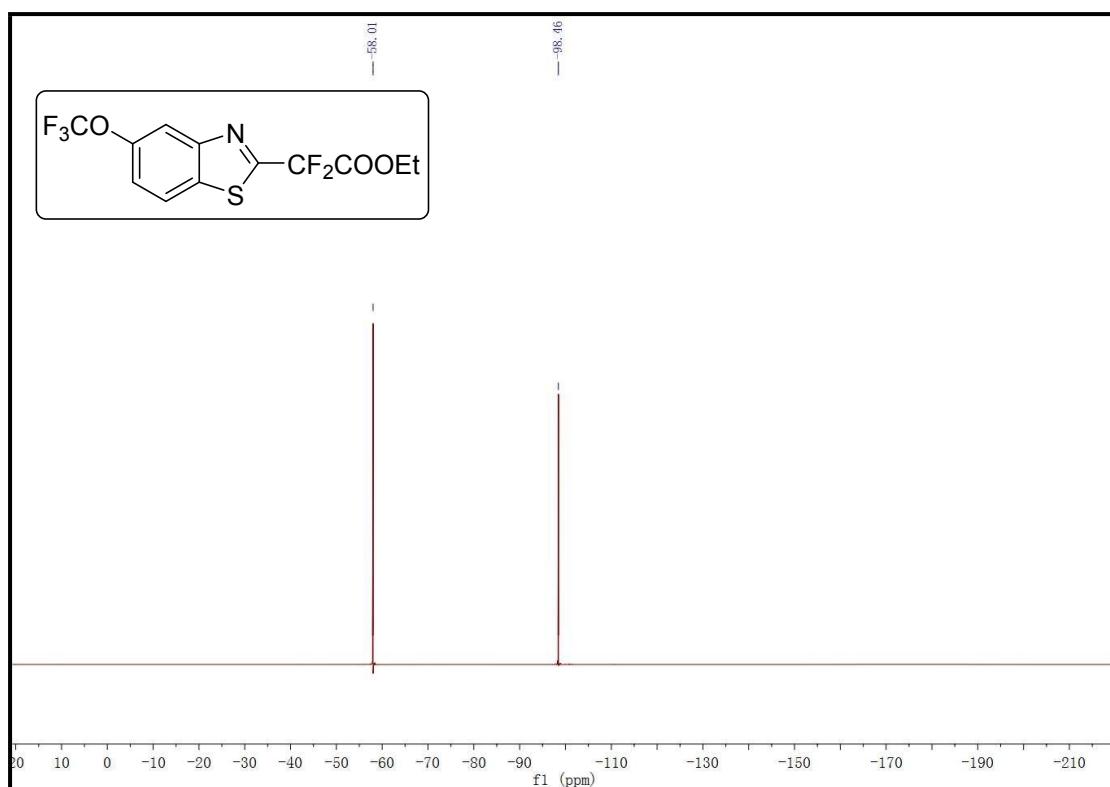

**ethyl 2,2-difluoro-2-(5-methylbenzo[d]thiazol-2-yl)acetate (5e)**

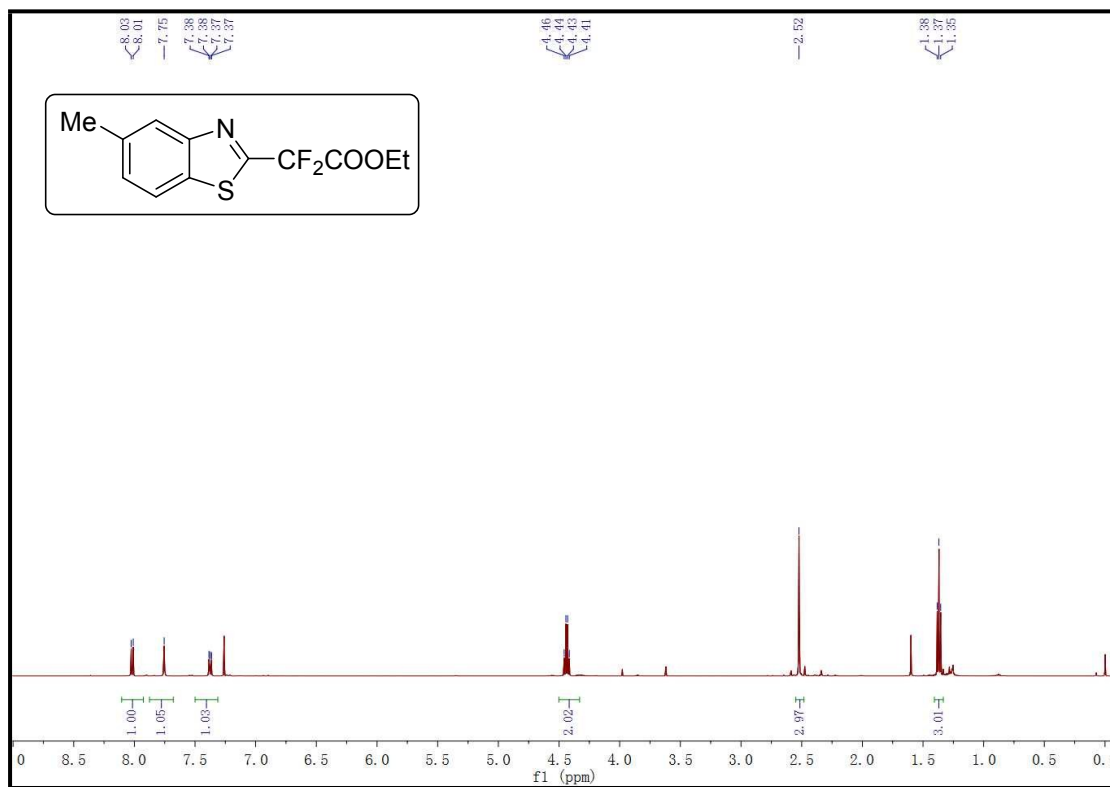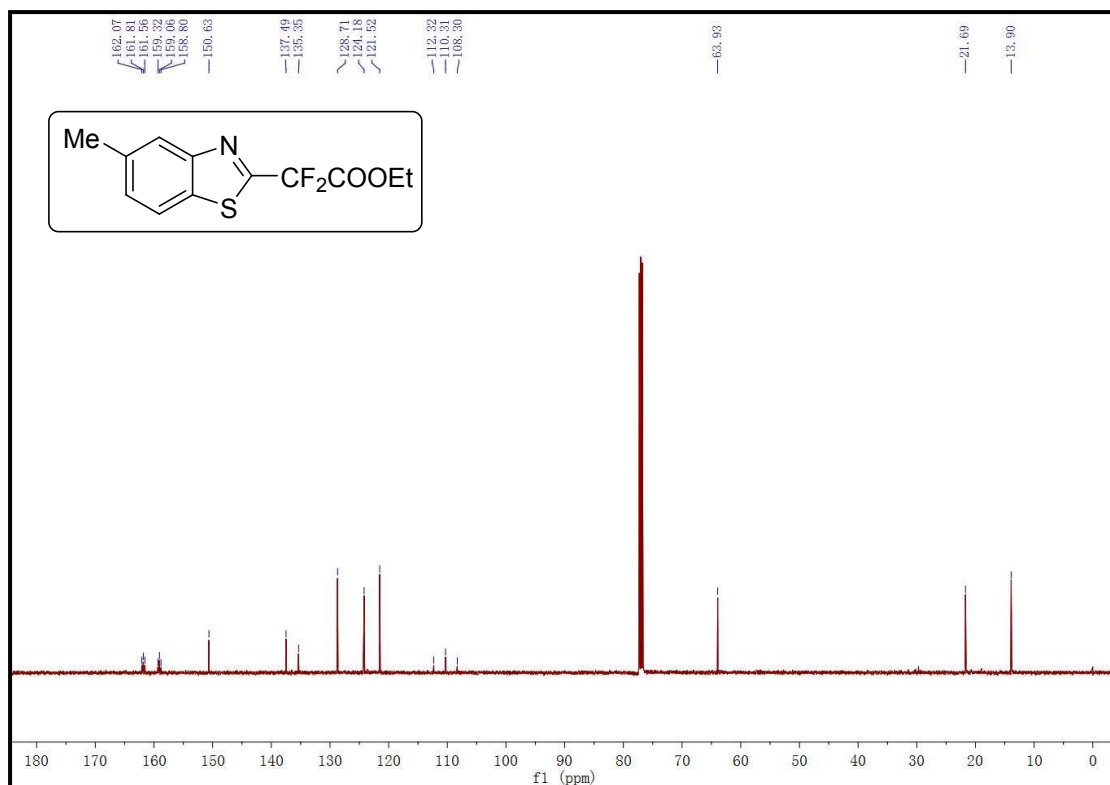

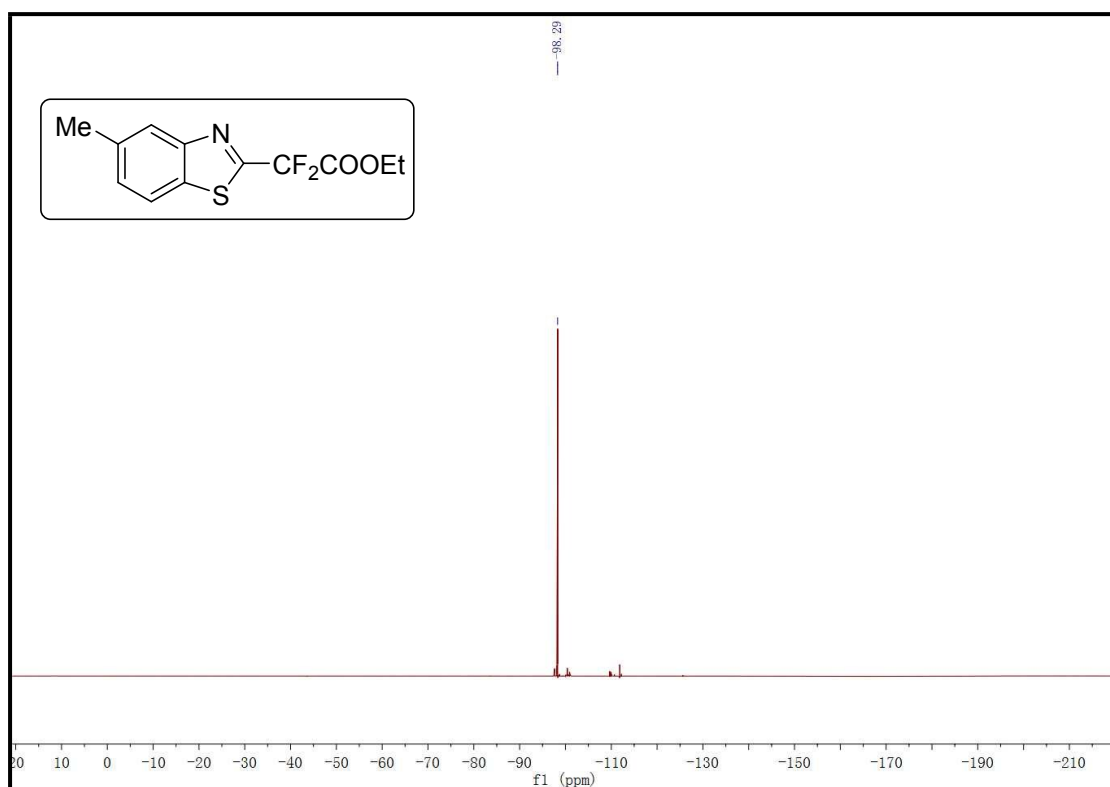

**ethyl 2-(5-bromobenzo[d]thiazol-2-yl)-2,2-difluoroacetate (5f)**

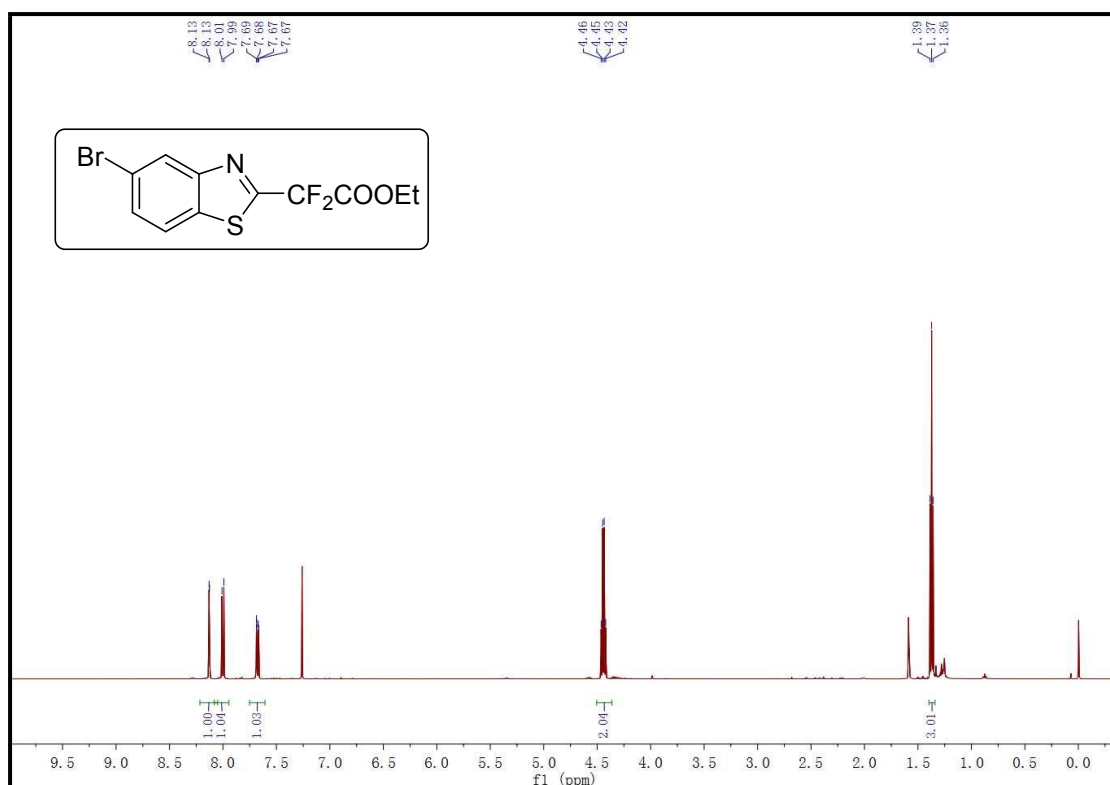

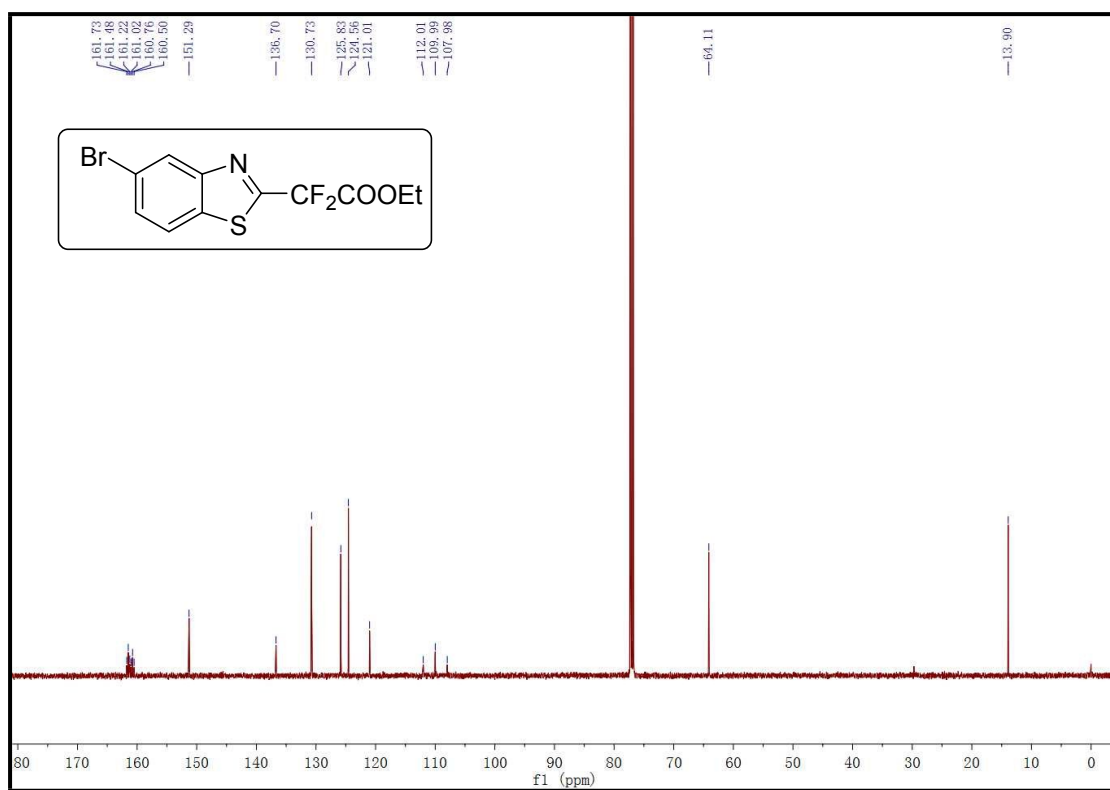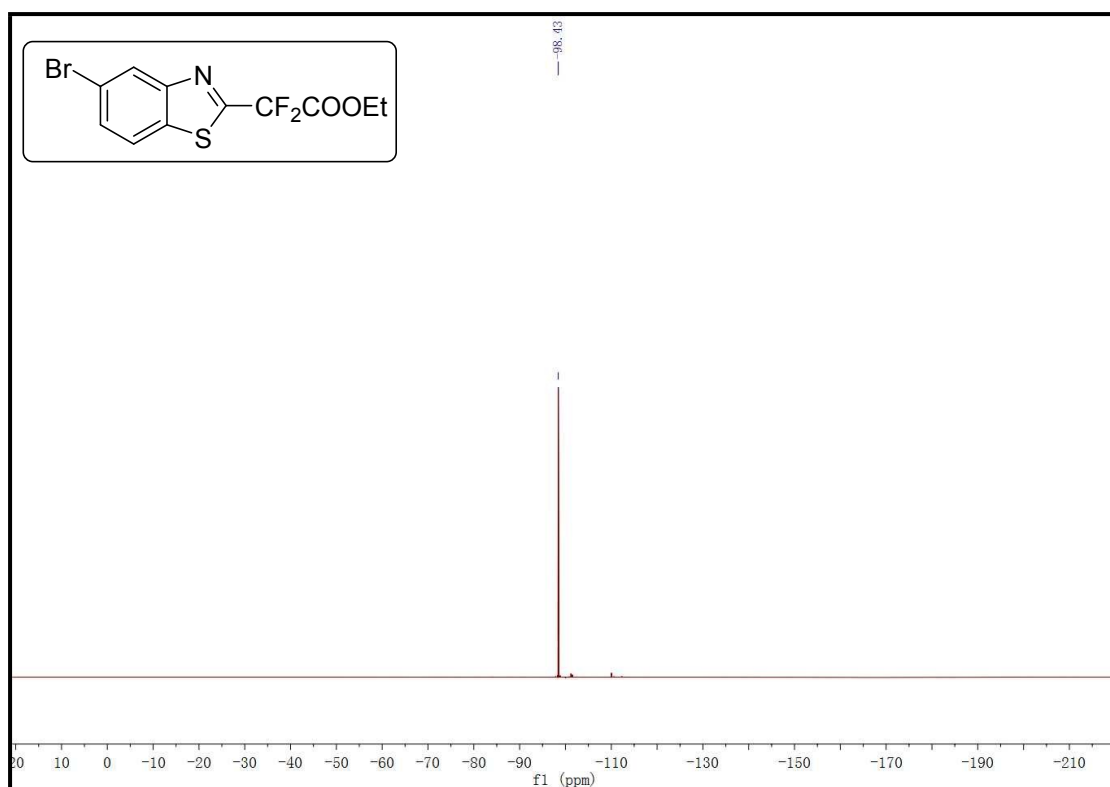

Chemical structure: CCOC(=O)C(F)(F)C1=NC2=CC=CC=C2S1

<sup>1</sup>H NMR spectrum (CDCl<sub>3</sub>) showing peaks at 7.84, 7.82, 7.91, 7.84, 7.83, 7.82, 7.31, 7.33, 7.31, 7.30, 7.29, 4.46, 4.45, 4.44, 4.42, 1.39, 1.38, 1.36 ppm. Integration values are 1.00, 1.00, 1.03, 2.05, 3.00.

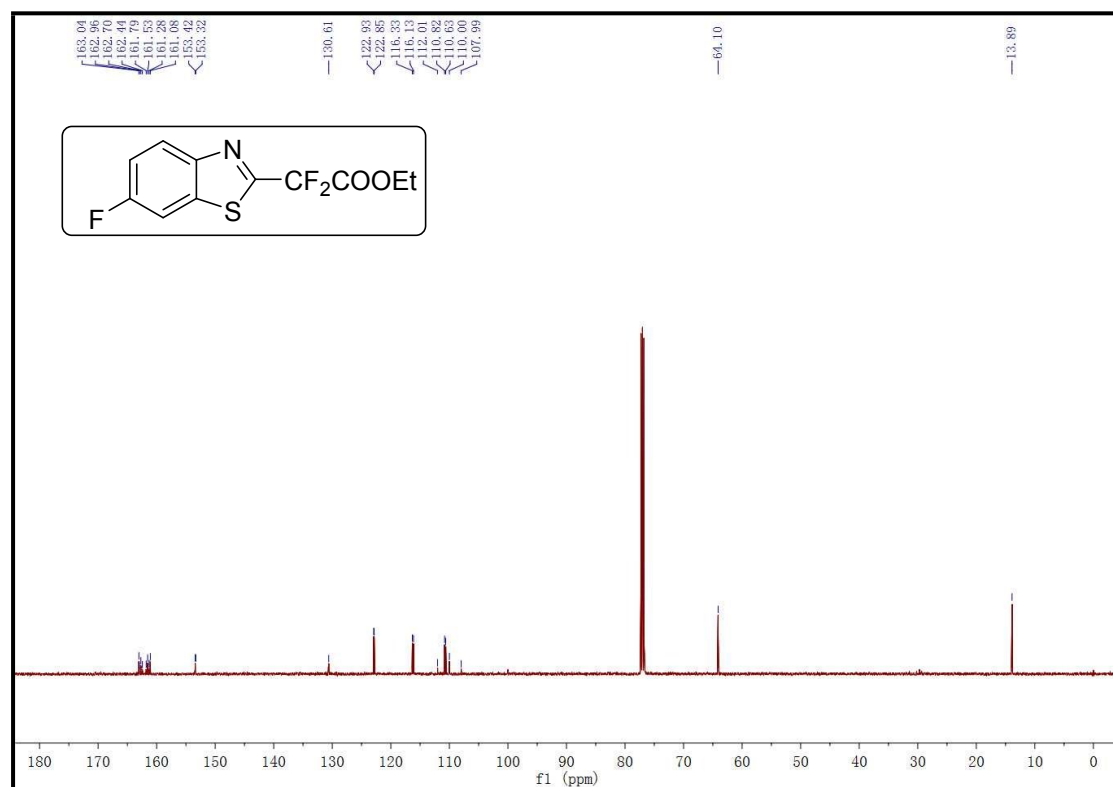

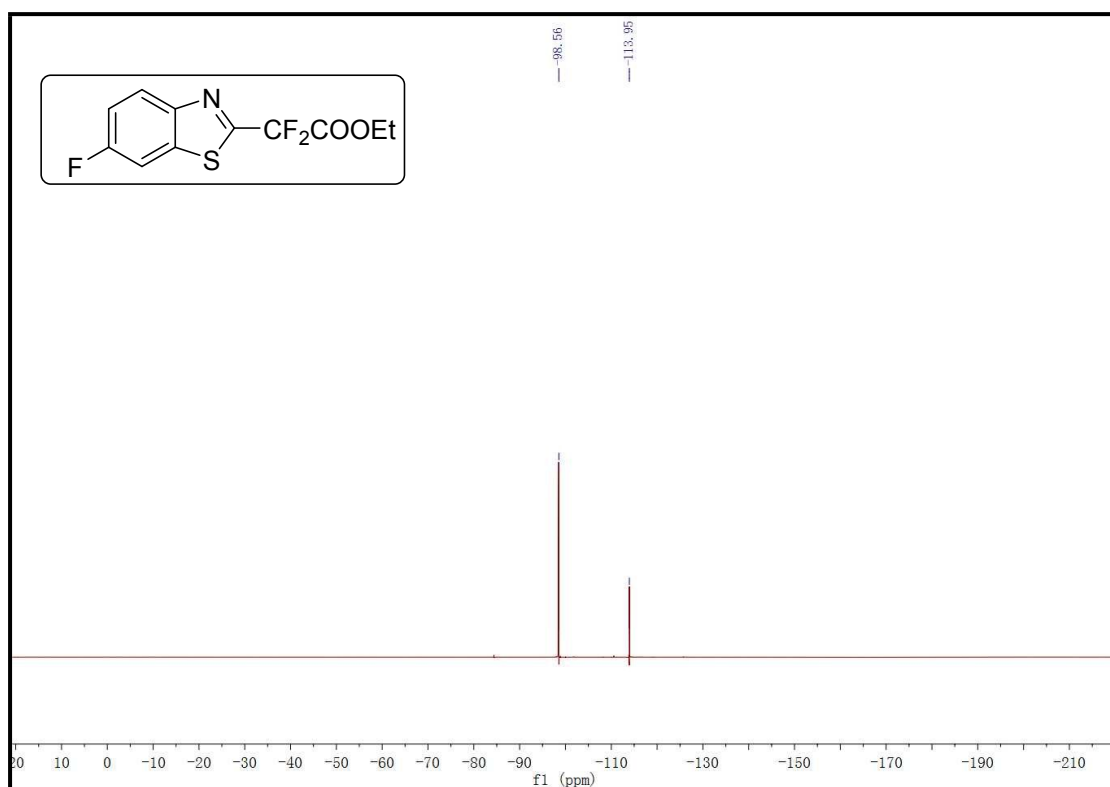

**ethyl 2-(4,6-difluorobenzo[*d*]thiazol-2-yl)-2,2-difluoroacetate (5h)**

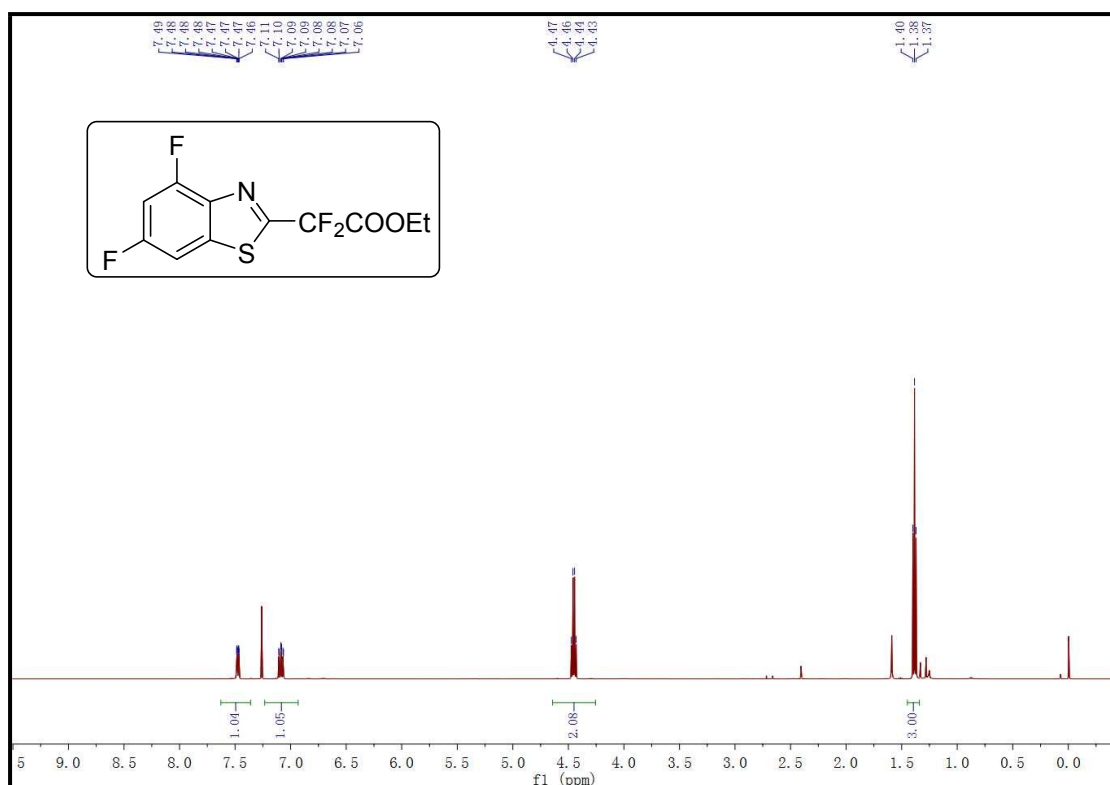

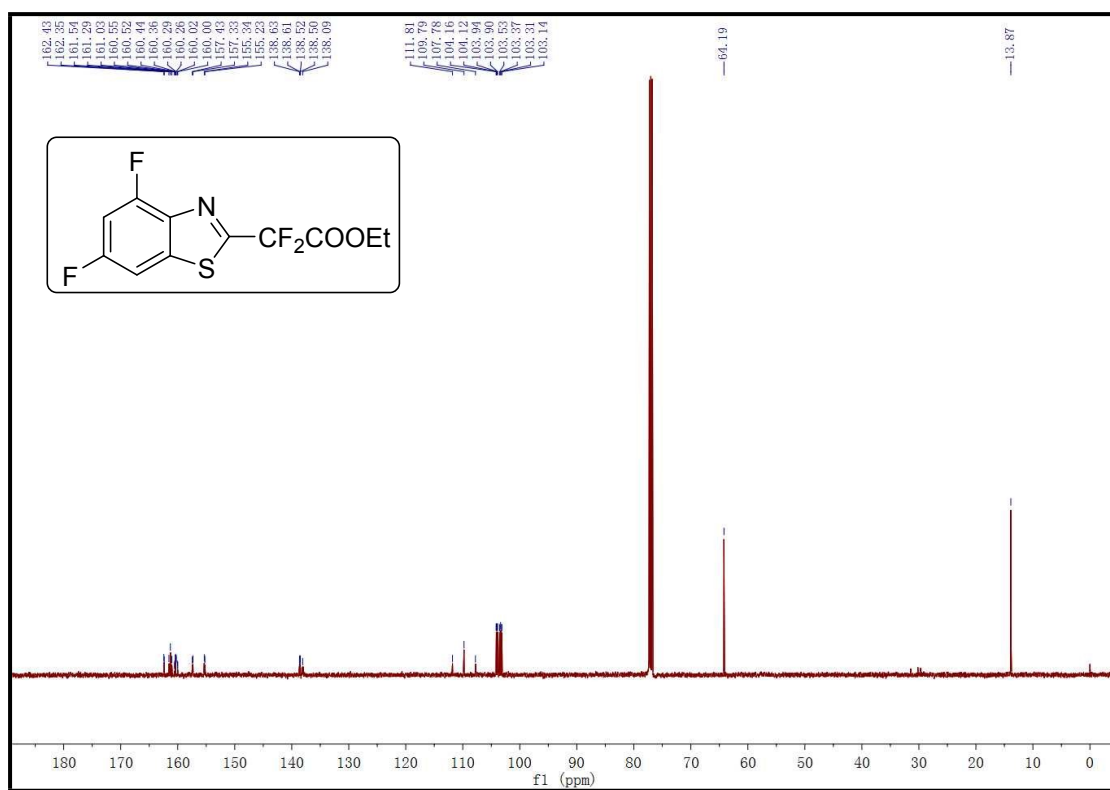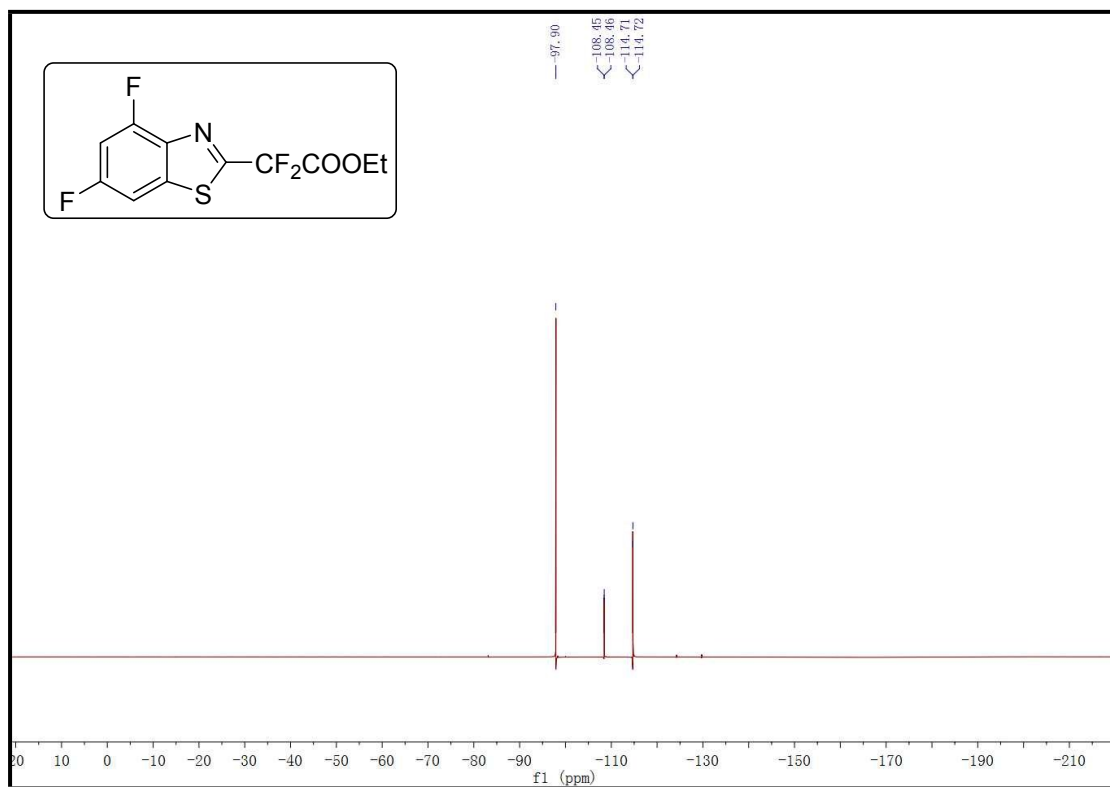



**(2'-isocyano-[1,1'-biphenyl]-4-yl)(methyl)sulfane (8)**

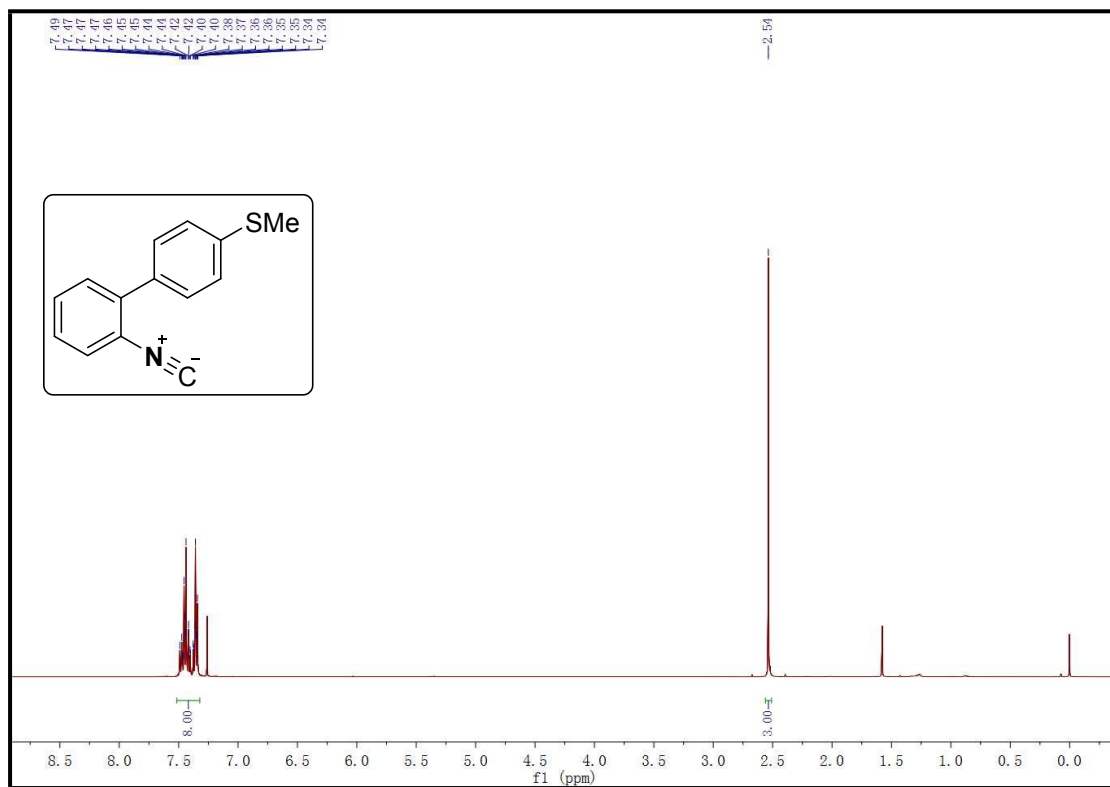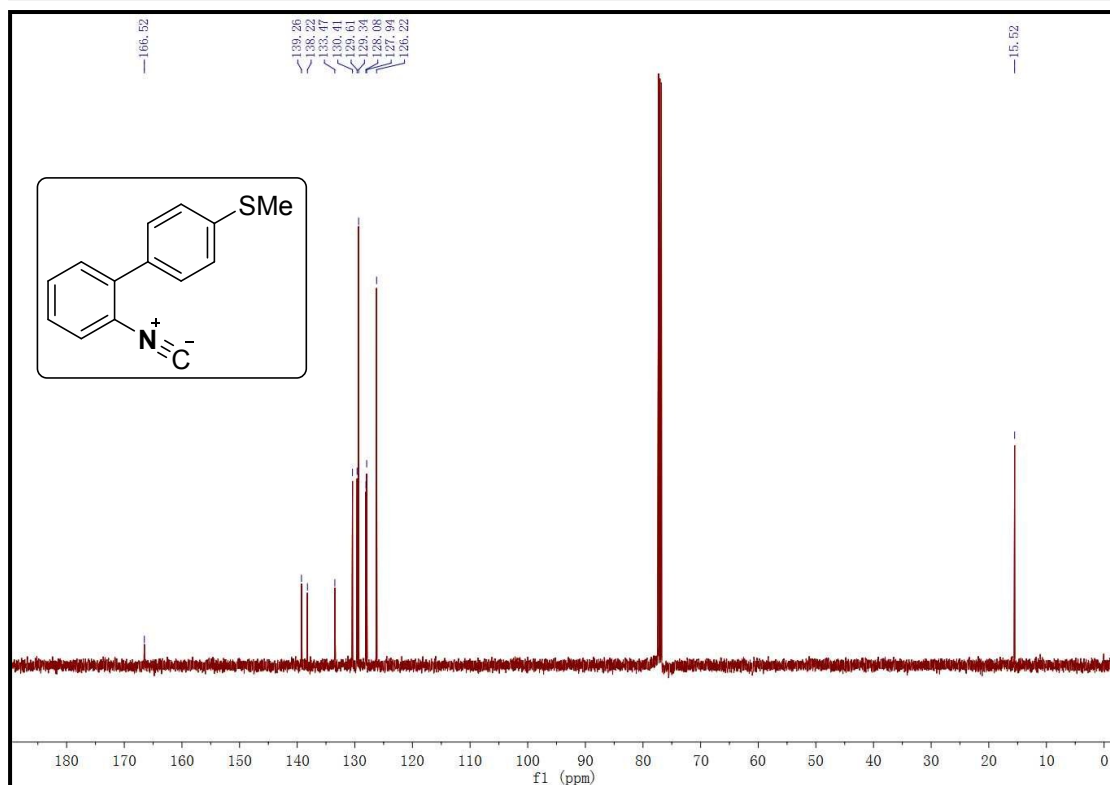

**(2'-isocyano-[1,1'-biphenyl]-4-yl)(methyl)sulfane (11)**

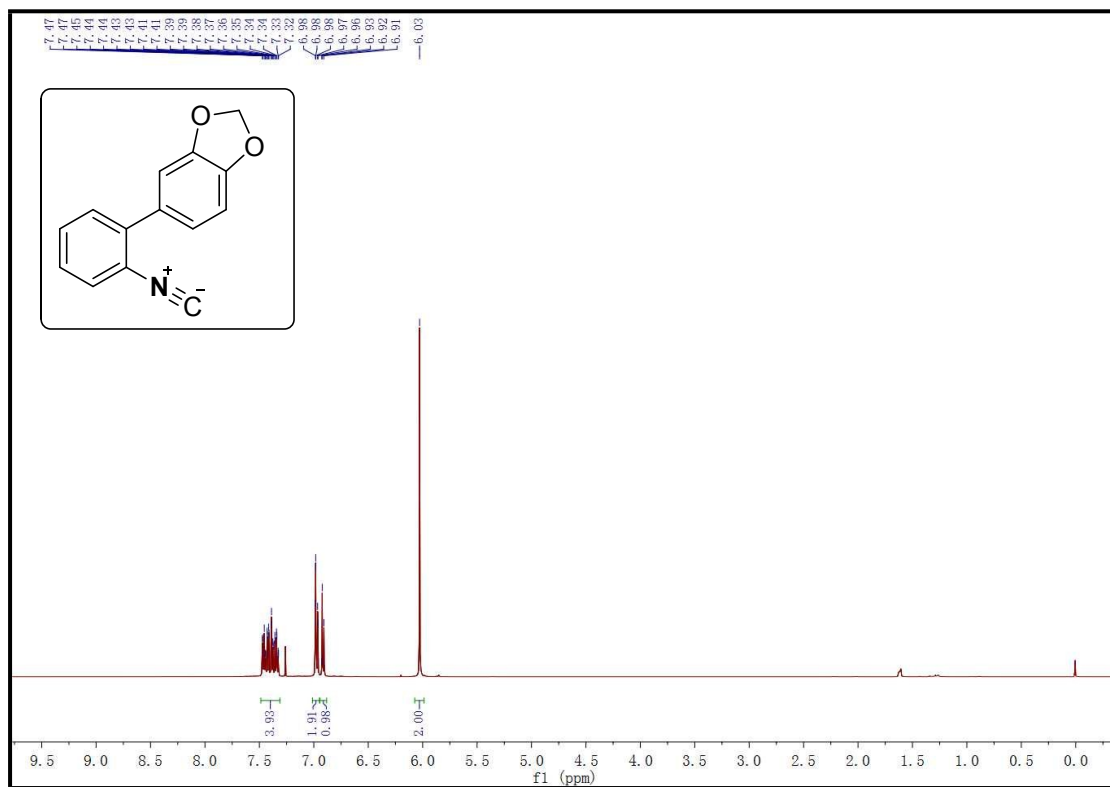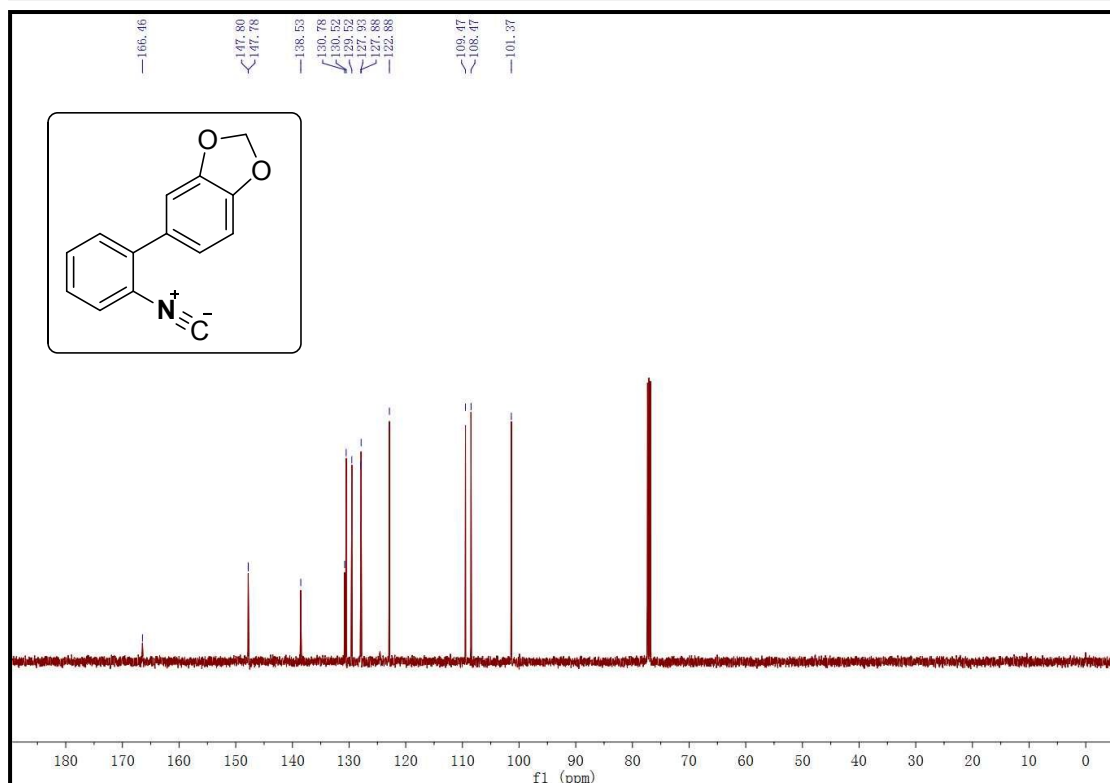

# 1-(difluoromethyl)-1*H*-benzo[d]imidazole (10)

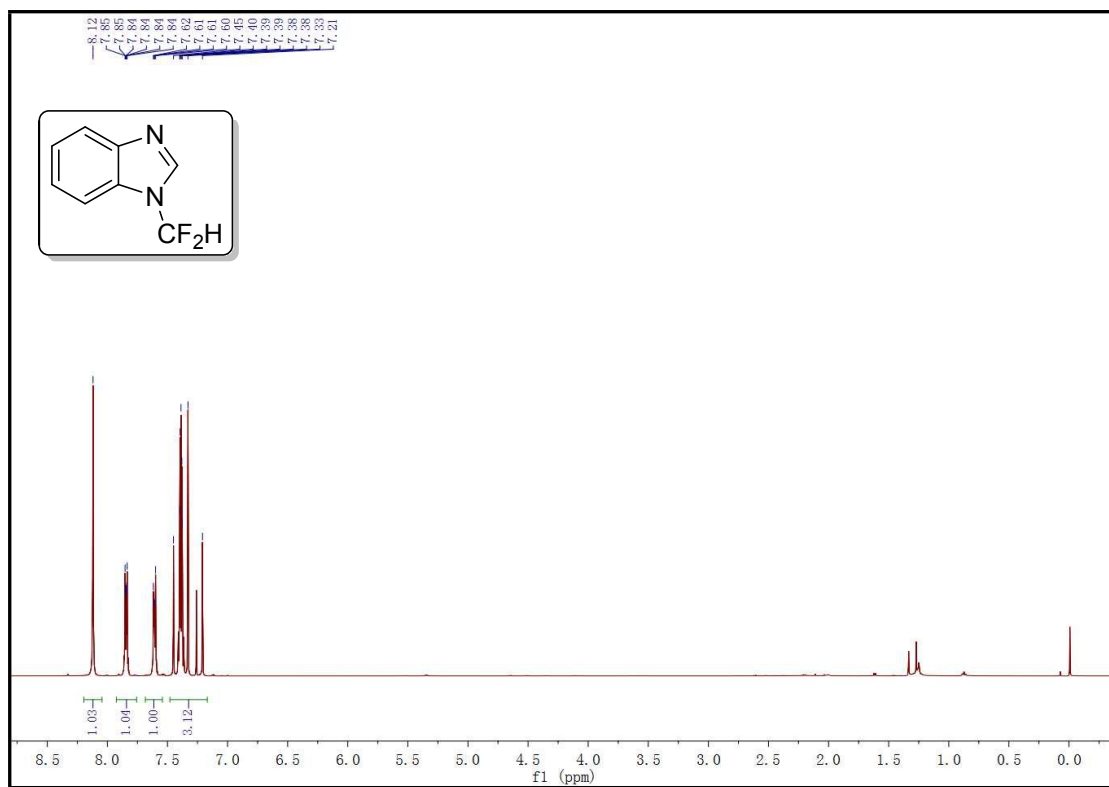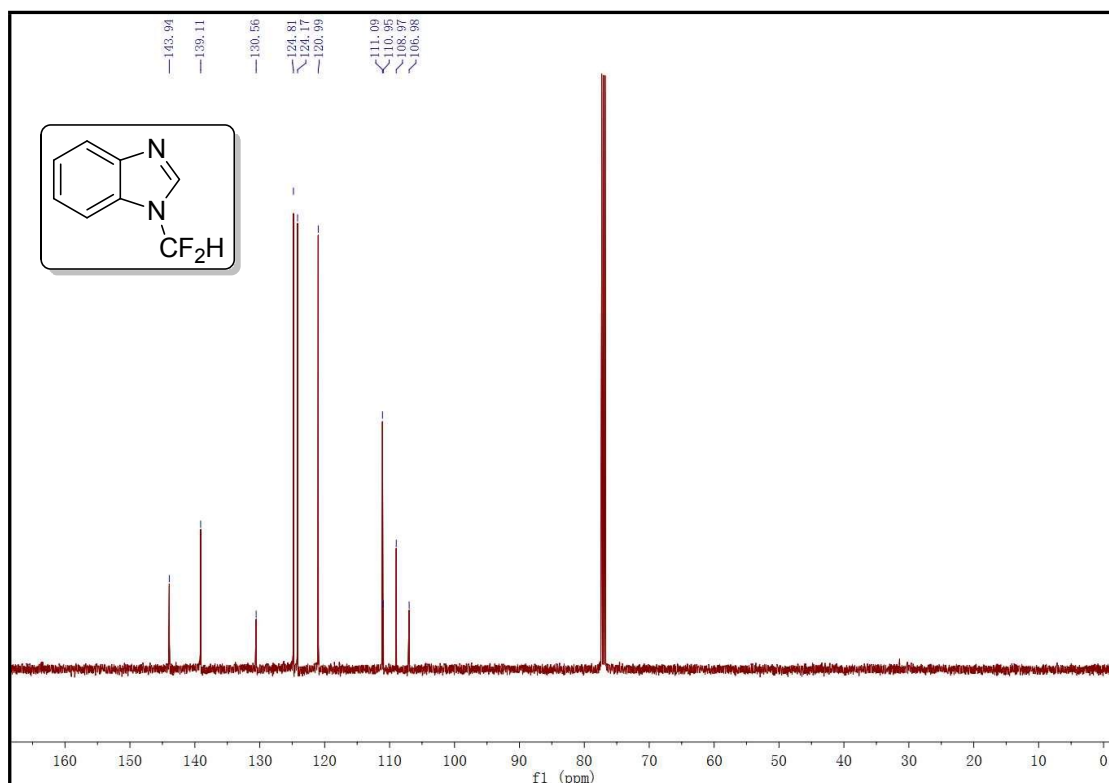

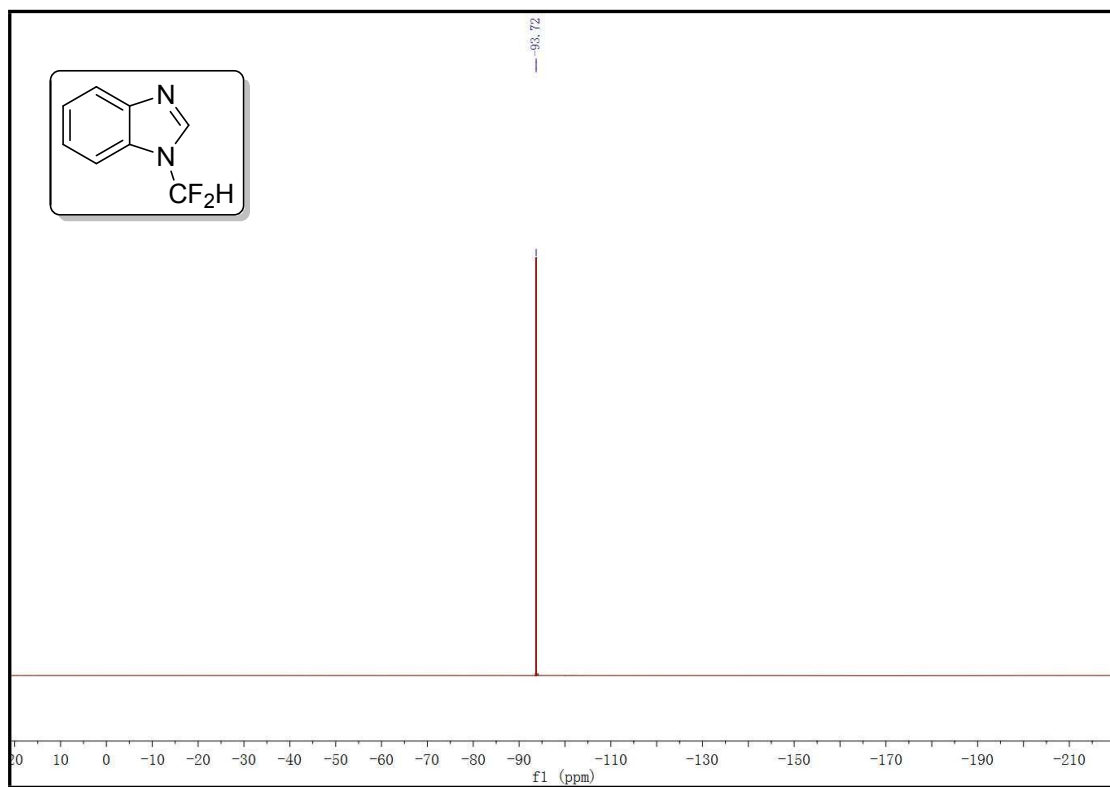

Supplement: c8cc04298e1.pdf [file c8cc04298e1.pdf]
